# Supplementary material for: Effects of Synbiotics, Probiotics, and Prebiotics on Liver Enzymes of Patients With Non-alcoholic Fatty Liver Disease: A Systematic Review and Network Meta-Analysis
Source: PubMed Central journal article supplement (PMC9167056; doi:10.3389/fnut.2022.880014), 2022-05-20
Supplement: Data_Sheet_1.pdf [file Data_Sheet_1.pdf]

## **Supplementary Material**

**Effects of Synbiotics, Probiotics, and Prebiotics on Liver Enzymes of Patients with Non-Alcoholic Fatty Liver Disease: A Systematic Review and Network Meta-analysis**

## TABLE OF CONTENTS

|                                                                                                                   |           |
|-------------------------------------------------------------------------------------------------------------------|-----------|
| <b>Appendix 1: Search strategies</b> .....                                                                        | <b>7</b>  |
| Table S1 Search algorithms .....                                                                                  | 7         |
| <b>Appendix 2: General characteristics of interventions</b> .....                                                 | <b>13</b> |
| Table S2 General characteristics of interventions.....                                                            | 13        |
| <b>Appendix 3: Description of interventions of each included study</b> .....                                      | <b>14</b> |
| Table S3 Description of interventions .....                                                                       | 14        |
| <b>Appendix 4: Baseline characteristics of included studies</b> .....                                             | <b>19</b> |
| Table S4 Baseline characteristics of patients with non-alcoholic fatty liver disease .....                        | 19        |
| <b>Appendix 5: Networks of all option comparisons for secondary outcomes</b> .....                                | <b>24</b> |
| Figure S1 Networks of all option comparisons for reduction in body mass index .....                               | 24        |
| Figure S2 Networks of all option comparisons for reduction in waist circumference .....                           | 24        |
| Figure S3 Networks of all option comparisons for reduction in total cholesterol.....                              | 25        |
| Figure S4 Networks of all option comparisons for reduction in triglycerides.....                                  | 25        |
| Figure S5 Networks of all option comparisons for reduction in low-density lipoproteins.....                       | 26        |
| Figure S6 Networks of all option comparisons for increasing in high-density lipoproteins. ....                    | 26        |
| Figure S7 Networks of all option comparisons for reduction in fasting blood sugar.....                            | 27        |
| Figure S8 Networks of all option comparisons for reduction in HOMA-IR.....                                        | 27        |
| <b>Appendix 6: Risk-of-bias assessments</b> .....                                                                 | <b>28</b> |
| Figure S9 Risk-of-bias summary graph.....                                                                         | 28        |
| Figure S10 Risk-of-bias summary: judgments about each bias item for each study.....                               | 29        |
| <b>Appendix 7: Data extracted for primary outcomes of network meta-analysis</b> .....                             | <b>30</b> |
| Table S5 AST and ALT changes in patients with non-alcoholic fatty liver disease .....                             | 30        |
| <b>Appendix 8: Data extracted for secondary outcomes of network meta-analysis</b> .....                           | <b>32</b> |
| Table S6 Body mass index and waist circumference changes in patients with non-alcoholic fatty liver disease ..... | 32        |
| Table S7 Lipid profile changes in patients with non-alcoholic fatty liver disease.....                            | 34        |
| Table S8 FBS and HOMA-IR changes in patients with non-alcoholic fatty liver disease.....                          | 36        |
| <b>Appendix 9: Result of network meta-analysis</b> .....                                                          | <b>38</b> |
| Table S9 Network-estimated, weighted mean difference of options for reduction in AST (IU/L).....                  | 38        |
| Table S10 Network-estimated, weighted mean difference of options for reduction in ALT (IU/L).....                 | 38        |
| Table S11 Network-estimated, weighted mean difference of options for reduction in BMI (kg/m <sup>2</sup> ) .....  | 38        |
| Table S12 Network-estimated, weighted mean difference of options for reduction in WC (cm).....                    | 38        |
| Table S13 Network-estimated, weighted mean difference of options for reduction in TC (mg/dL).....                 | 38        |
| Table S14 Network-estimated, weighted mean difference of options for reduction in TG (mg/dL) .....                | 39        |
| Table S15 Network-estimated, weighted mean difference of options for reduction in LDL (mg/dL).....                | 39        |
| Table S16 Network-estimated, weighted mean difference of options for increasing HDL (mg/dL) .....                 | 39        |
| Table S17 Network-estimated, weighted mean difference of options for reduction in FBS (mg/dL).....                | 39        |
| Table S18 Network-estimated, weighted mean difference of options for reduction in HOMA-IR .....                   | 39        |
| <b>Appendix 10: Surface under the cumulative ranking curves</b> .....                                             | <b>40</b> |
| Figure S11 SUCRA curves for reduction in aspartate transaminase.....                                              | 40        |
| Figure S12 SUCRA curves for reduction in alanine transaminase .....                                               | 40        |
| Figure S13 SUCRA curves for reduction in body mass index.....                                                     | 41        |
| Figure S14 SUCRA curves for reduction in waist circumference.....                                                 | 41        |
| Figure S15 SUCRA curves for reduction in total cholesterol.....                                                   | 42        |
| Figure S16 SUCRA curves for reduction in triglycerides.....                                                       | 42        |

|                                                                                                                                                                        |           |
|------------------------------------------------------------------------------------------------------------------------------------------------------------------------|-----------|
| Figure S17 SUCRA curves for reduction in low-density lipoproteins.....                                                                                                 | 43        |
| Figure S18 SUCRA curves for increasing high-density lipoproteins .....                                                                                                 | 43        |
| Figure S19 SUCRA curves for reduction in fasting blood sugar.....                                                                                                      | 44        |
| Figure S20 SUCRA curves for reduction in HOMA-IR.....                                                                                                                  | 44        |
| <b>Appendix 11: Assessment of inconsistency.....</b>                                                                                                                   | <b>45</b> |
| Table S19 Assessment of global inconsistency in network meta-analysis.....                                                                                             | 45        |
| <b>Appendix 12: Comparison-adjusted funnel plots.....</b>                                                                                                              | <b>46</b> |
| Figure S21 Comparison-adjusted funnel plot for the network of reduction in AST in all comparisons .....                                                                | 46        |
| Figure S22 Comparison-adjusted funnel plot for the network of reduction in ALT in all comparisons .....                                                                | 46        |
| Figure S23 Comparison-adjusted funnel plot for the network of reduction in BMI in all comparisons .....                                                                | 47        |
| Figure S24 Comparison-adjusted funnel plot for the network of reduction in WC in all comparisons .....                                                                 | 47        |
| Figure S25 Comparison-adjusted funnel plot for the network of reduction in TC in all comparisons.....                                                                  | 48        |
| Figure S26 Comparison-adjusted funnel plot for the network of reduction in TG in all comparisons.....                                                                  | 48        |
| Figure S27 Comparison-adjusted funnel plot for the network of reduction in LDL in all comparisons .....                                                                | 49        |
| Figure S28 Comparison-adjusted funnel plot for the network of increasing HDL in all comparisons .....                                                                  | 49        |
| Figure S29 Comparison-adjusted funnel plot for the network of reduction in FBS in all comparisons.....                                                                 | 50        |
| Figure S30 Comparison-adjusted funnel plot for the network of reduction in HOMA-IR in all comparisons.....                                                             | 50        |
| <b>Appendix 13: Sensitivity analyses of AST outcomes.....</b>                                                                                                          | <b>51</b> |
| Figure S31 Sensitivity analysis of the reduction in AST among biopsy-proven NASH patients. (a) network graph and (b) SUCRA curves.....                                 | 51        |
| Table S20 Network-estimated, weighted mean difference of options for reduction in AST among biopsy-proven NASH patients. ....                                          | 51        |
| Figure S32 Sensitivity analysis of the reduction in AST duration of treatment not less than 12 weeks among NAFLD patients. (a) network graph and (b) SUCRA curves..... | 52        |
| Table S21 Network-estimated, weighted mean difference of options for reduction in AST duration of treatment not less than 12 weeks among NAFLD patients.....           | 52        |
| Figure S33 Sensitivity analysis of the reduction in AST duration of treatment less than 12 weeks among NAFLD patients. (a) network graph and (b) SUCRA curves.....     | 53        |
| Table S22 Network-estimated, weighted mean difference of options for reduction in AST duration of treatment less than 12 weeks among NAFLD patients.....               | 53        |
| Figure S34 Sensitivity analysis of the reduction in AST duration of treatment not less than 12 weeks among NASH patients. (a) network graph and (b) SUCRA curves ..... | 54        |
| Table S23 Network-estimated, weighted mean difference of options for reduction in AST duration of treatment not less than 12 weeks among NASH patients.....            | 54        |
| Figure S35 Sensitivity analysis of the reduction in AST duration of treatment less than 12 weeks among NASH patients. (a) network graph and (b) SUCRA curves .....     | 55        |
| Table S24 Network-estimated, weighted mean difference of options for reduction in AST duration of treatment less than 12 weeks among NASH patients.....                | 55        |
| <b>Appendix 14: Sensitivity analyses of ALT outcomes.....</b>                                                                                                          | <b>56</b> |
| Figure S36 Sensitivity analysis of the reduction in ALT among biopsy-proven NASH patients. (a) network graph and (b) SUCRA curves.....                                 | 56        |
| Table S25 Network-estimated, weighted mean difference of options for reduction in ALT among biopsy-proven NASH patients. ....                                          | 56        |
| Figure S37 Sensitivity analysis of the reduction in ALT duration of treatment not less than 12 weeks among NAFLD patients. (a) network graph and (b) SUCRA curves..... | 57        |
| Table S26 Network-estimated, weighted mean difference of options for reduction in ALT duration of treatment not less than 12 weeks among NAFLD patients.....           | 57        |
| Figure S38 Sensitivity analysis of the reduction in ALT duration of treatment less than 12 weeks among NAFLD patients. (a) network graph and (b) SUCRA curves.....     | 58        |
| Table S27 Network-estimated, weighted mean difference of options for reduction in ALT duration of treatment less than 12 weeks among NAFLD patients.....               | 58        |

|                                                                                                                                                                        |           |
|------------------------------------------------------------------------------------------------------------------------------------------------------------------------|-----------|
| Figure S39 Sensitivity analysis of the reduction in ALT duration of treatment not less than 12 weeks among NASH patients. (a) network graph and (b) SUCRA curves ..... | 59        |
| Table S28 Network-estimated, weighted mean difference of options for reduction in ALT duration of treatment not less than 12 weeks among NASH patients.....            | 59        |
| Figure S40 Sensitivity analysis of the reduction in ALT duration of treatment less than 12 weeks among NASH patients. (a) network graph and (b) SUCRA curves .....     | 60        |
| Table S29 Network-estimated, weighted mean difference of options for reduction in ALT duration of treatment less than 12 weeks among NASH patients.....                | 60        |
| <b>Appendix 15: Sensitivity analyses of BMI outcomes.....</b>                                                                                                          | <b>61</b> |
| Figure S41 Sensitivity analysis of the reduction in BMI among biopsy-proven NASH patients. (a) network graph and (b) SUCRA curves.....                                 | 61        |
| Table S30 Network-estimated, weighted mean difference of options for reduction in BMI among biopsy-proven NASH patients. ....                                          | 61        |
| Figure S42 Sensitivity analysis of the reduction in BMI duration of treatment not less than 12 weeks among NAFLD patients. (a) network graph and (b) SUCRA curves..... | 62        |
| Table S31 Network-estimated, weighted mean difference of options for reduction in BMI duration of treatment not less than 12 weeks among NAFLD patients.....           | 62        |
| Figure S43 Sensitivity analysis of the reduction in BMI duration of treatment less than 12 weeks among NAFLD patients. (a) network graph and (b) SUCRA curves.....     | 63        |
| Table S32 Network-estimated, weighted mean difference of options for reduction in BMU duration of treatment less than 12 weeks among NAFLD patients.....               | 63        |
| Figure S44 Sensitivity analysis of the reduction in BMI duration of treatment not less than 12 weeks among NASH patients. (a) network graph and (b) SUCRA curves ..... | 64        |
| Table S33 Network-estimated, weighted mean difference of options for reduction in BMI duration of treatment not less than 12 weeks among NASH patients.....            | 64        |
| <b>Appendix 16: Sensitivity analyses of WC outcomes.....</b>                                                                                                           | <b>65</b> |
| Figure S45 Sensitivity analysis of the reduction in WC among biopsy-proven NASH patients. (a) network graph and (b) SUCRA curves.....                                  | 65        |
| Table S34 Network-estimated, weighted mean difference of options for reduction in WC among biopsy-proven NASH patients. ....                                           | 65        |
| Figure S46 Sensitivity analysis of the reduction in WC duration of treatment not less than 12 weeks among NAFLD patients. (a) network graph and (b) SUCRA curves.....  | 66        |
| Table S35 Network-estimated, weighted mean difference of options for reduction in WC duration of treatment not less than 12 weeks among NAFLD patients.....            | 66        |
| Figure S47 Sensitivity analysis of the reduction in WC duration of treatment less than 12 weeks among NAFLD patients. (a) network graph and (b) SUCRA curves.....      | 67        |
| Table S36 Network-estimated, weighted mean difference of options for reduction in WC duration of treatment less than 12 weeks among NAFLD patients.....                | 67        |
| Figure S48 Sensitivity analysis of the reduction in WC duration of treatment not less than 12 weeks among NASH patients. (a) network graph and (b) SUCRA curves .....  | 68        |
| Table S37 Network-estimated, weighted mean difference of options for reduction in WC duration of treatment not less than 12 weeks among NASH patients.....             | 68        |
| <b>Appendix 17: Sensitivity analyses of lipid profile outcomes.....</b>                                                                                                | <b>69</b> |
| Figure S49 Sensitivity analysis of the reduction in TC among biopsy-proven NASH patients. (a) network graph and (b) SUCRA curves.....                                  | 69        |
| Table S38 Network-estimated, weighted mean difference of options for reduction in TC among biopsy-proven NASH patients. ....                                           | 69        |
| Figure S50 Sensitivity analysis of the reduction in TC duration of treatment not less than 12 weeks among NAFLD patients. (a) network graph and (b) SUCRA curves ..... | 70        |
| Table S39 Network-estimated, weighted mean difference of options for reduction in TC duration of treatment not less than 12 weeks among NAFLD patients. ....           | 70        |

|                                                                                                                                                                         |    |
|-------------------------------------------------------------------------------------------------------------------------------------------------------------------------|----|
| Figure S51 Sensitivity analysis of the reduction in TC duration of treatment less than 12 weeks among NAFLD patients. (a) network graph and (b) SUCRA curves .....      | 71 |
| Table S40 Network-estimated, weighted mean difference of options for reduction in TC duration of treatment less than 12 weeks among NAFLD patients. ....                | 71 |
| Figure S52 Sensitivity analysis of the reduction in TC duration of treatment not less than 12 weeks among NASH patients. (a) network graph and (b) SUCRA curves.....    | 72 |
| Table S41 Network-estimated, weighted mean difference of options for reduction in TC duration of treatment not less than 12 weeks among NASH patients. ....             | 72 |
| Figure S53 Sensitivity analysis of the reduction in TG among biopsy-proven NASH patients. (a) network graph and (b) SUCRA curves.....                                   | 73 |
| Table S42 Network-estimated, weighted mean difference of options for reduction in TG among biopsy-proven NASH patients. ....                                            | 73 |
| Figure S54 Sensitivity analysis of the reduction in TG duration of treatment not less than 12 weeks among NAFLD patients. (a) network graph and (b) SUCRA curves .....  | 74 |
| Table S43 Network-estimated, weighted mean difference of options for reduction in TG duration of treatment not less than 12 weeks among NAFLD patients. ....            | 74 |
| Figure S55 Sensitivity analysis of the reduction in TG duration of treatment less than 12 weeks among NAFLD patients. (a) network graph and (b) SUCRA curves .....      | 75 |
| Table S44 Network-estimated, weighted mean difference of options for reduction in TG duration of treatment less than 12 weeks among NAFLD patients. ....                | 75 |
| Figure S56 Sensitivity analysis of the reduction in TG duration of treatment not less than 12 weeks among NASH patients. (a) network graph and (b) SUCRA curves.....    | 76 |
| Table S45 Network-estimated, weighted mean difference of options for reduction in TG duration of treatment not less than 12 weeks among NASH patients. ....             | 76 |
| Figure S57 Sensitivity analysis of the reduction in LDL among biopsy-proven NASH patients. (a) network graph and (b) SUCRA curves.....                                  | 77 |
| Table S46 Network-estimated, weighted mean difference of options for reduction in LDL among biopsy-proven NASH patients. ....                                           | 77 |
| Figure S58 Sensitivity analysis of the reduction in LDL duration of treatment not less than 12 weeks among NAFLD patients. (a) network graph and (b) SUCRA curves.....  | 78 |
| Table S47 Network-estimated, weighted mean difference of options for reduction in LDL duration of treatment not less than 12 weeks among NAFLD patients.....            | 78 |
| Figure S59 Sensitivity analysis of the reduction in LDL duration of treatment less than 12 weeks among NAFLD patients. (a) network graph and (b) SUCRA curves.....      | 79 |
| Table S48 Network-estimated, weighted mean difference of options for reduction in LDL duration of treatment less than 12 weeks among NAFLD patients.....                | 79 |
| Figure S60 Sensitivity analysis of the reduction in LDL duration of treatment not less than 12 weeks among NASH patients. (a) network graph and (b) SUCRA curves .....  | 80 |
| Table S49 Network-estimated, weighted mean difference of options for reduction in LDL duration of treatment not less than 12 weeks among NASH patients. ....            | 80 |
| Figure S61 Sensitivity analysis of the increasing in HDL among biopsy-proven NASH patients. (a) network graph and (b) SUCRA curves.....                                 | 81 |
| Table S50 Network-estimated, weighted mean difference of options for increasing in HDL among biopsy-proven NASH patients. ....                                          | 81 |
| Figure S62 Sensitivity analysis of the increasing in HDL duration of treatment not less than 12 weeks among NAFLD patients. (a) network graph and (b) SUCRA curves..... | 82 |
| Table S51 Network-estimated, weighted mean difference of options for increasing in HDL duration of treatment not less than 12 weeks among NAFLD patients.....           | 82 |
| Figure S63 Sensitivity analysis of the increasing in HDL duration of treatment less than 12 weeks among NAFLD patients. (a) network graph and (b) SUCRA curves.....     | 83 |
| Table S52 Network-estimated, weighted mean difference of options for increasing in HDL duration of treatment less than 12 weeks among NAFLD patients.....               | 83 |

|                                                                                                                                                                             |           |
|-----------------------------------------------------------------------------------------------------------------------------------------------------------------------------|-----------|
| Figure S64 Sensitivity analysis of the increasing in HDL duration of treatment not less than 12 weeks among NASH patients. (a) network graph and (b) SUCRA curves.....      | 84        |
| Table S53 Network-estimated, weighted mean difference of options for increasing in HDL duration of treatment not less than 12 weeks among NASH patients.....                | 84        |
| <b>Appendix 18: Sensitivity analyses of FBS outcome.....</b>                                                                                                                | <b>85</b> |
| Figure S65 Sensitivity analysis of the reduction in FBS among biopsy-proven NASH patients. (a) network graph and (b) SUCRA curves.....                                      | 85        |
| Table S54 Network-estimated, weighted mean difference of options for reduction in FBS among biopsy-proven NASH patients. ....                                               | 85        |
| Figure S66 Sensitivity analysis of the reduction in FBS duration of treatment not less than 12 weeks among NAFLD patients. (a) network graph and (b) SUCRA curves.....      | 86        |
| Table S55 Network-estimated, weighted mean difference of options for reduction in FBS duration of treatment not less than 12 weeks among NAFLD patients.....                | 86        |
| Figure S67 Sensitivity analysis of the reduction in FBS duration of treatment less than 12 weeks among NAFLD patients. (a) network graph and (b) SUCRA curves.....          | 87        |
| Table S56 Network-estimated, weighted mean difference of options for reduction in FBS duration of treatment less than 12 weeks among NAFLD patients.....                    | 87        |
| Figure S68 Sensitivity analysis of the reduction in FBS duration of treatment not less than 12 weeks among NASH patients. (a) network graph and (b) SUCRA curves .....      | 88        |
| Table S57 Network-estimated, weighted mean difference of options for reduction in FBS duration of treatment not less than 12 weeks among NASH patients.....                 | 88        |
| <b>Appendix 19: Sensitivity analyses of HOMA-IR outcomes .....</b>                                                                                                          | <b>89</b> |
| Figure S69 Sensitivity analysis of the reduction in HOMA-IR among biopsy-proven NASH patients. (a) network graph and (b) SUCRA curves.....                                  | 89        |
| Table S58 Network-estimated, weighted mean difference of options for reduction in HOMA-IR among biopsy-proven NASH patients.....                                            | 89        |
| Figure S70 Sensitivity analysis of the reduction in HOMA-IR duration of treatment not less than 12 weeks among NAFLD patients. (a) network graph and (b) SUCRA curves ..... | 90        |
| Table S59 Network-estimated, weighted mean difference of options for reduction in HOMA-IR duration of treatment not less than 12 weeks among NAFLD patients.....            | 90        |
| Figure S71 Sensitivity analysis of the reduction in HOMA-IR duration of treatment less than 12 weeks among NAFLD patients. (a) network graph and (b) SUCRA curves .....     | 91        |
| Table S60 Network-estimated, weighted mean difference of options for reduction in HOMA-IR duration of treatment less than 12 weeks among NAFLD patients.....                | 91        |
| Figure S72 Sensitivity analysis of the reduction in HOMA-IR duration of treatment not less than 12 weeks among NASH patients. (a) network graph and (b) SUCRA curves .....  | 92        |
| Table S61 Network-estimated, weighted mean difference of options for reduction in HOMA-IR duration of treatment not less than 12 weeks among NASH patients.....             | 92        |

## Appendix 1: Search strategies

**Table S1** Search algorithms

| Database | Search algorithm                                                                                                               | Item found |
|----------|--------------------------------------------------------------------------------------------------------------------------------|------------|
| Pubmed   | #1 synbiotics                                                                                                                  | 2006       |
|          | #2 probiotics                                                                                                                  | 36068      |
|          | #3 Lactobacillus*                                                                                                              | 455324     |
|          | #4 Bifidobacterium*                                                                                                            | 11474      |
|          | #5 "Enterococcus faecium"                                                                                                      | 7172       |
|          | #6 "Streptococcus thermophiles"                                                                                                | 32         |
|          | #7 "Bacillus clausii"                                                                                                          | 150        |
|          | #8 "Saccharomyces cerevisiae"                                                                                                  | 135887     |
|          | #9 "Saccharomyces boulardii"                                                                                                   | 798        |
|          | #10 "Escherichia coli Nissle 1917"                                                                                             | 243        |
|          | #11 prebiotics                                                                                                                 | 11686      |
|          | #12 FOS                                                                                                                        | 34164      |
|          | #13 Fructooligosaccharide*                                                                                                     | 2026       |
|          | #14 Fructo-oligosaccharide*                                                                                                    | 795        |
|          | #15 GOS                                                                                                                        | 4829       |
|          | #16 Galactooligosaccharide*                                                                                                    | 1211       |
|          | #17 Galacto-oligosaccharide*                                                                                                   | 710        |
|          | #18 XOS                                                                                                                        | 439        |
|          | #19 Xylooligosaccharide*                                                                                                       | 1176       |
|          | #20 Xylo-oligosaccharide*                                                                                                      | 407        |
|          | #21 TOS                                                                                                                        | 4536       |
|          | #22 Transgalactooligosaccharide*                                                                                               | 33         |
|          | #23 Trans-galactooligosaccharide*                                                                                              | 14         |
|          | #24 Inulin                                                                                                                     | 12037      |
|          | #25 Lactitol                                                                                                                   | 332        |
|          | #26 Lactulose                                                                                                                  | 4251       |
|          | #27 Lactosucrose                                                                                                               | 73         |
|          | #28 Soy oligosaccharide*                                                                                                       | 172        |
|          | #29 NAFLD                                                                                                                      | 28193      |
|          | #30 NASH                                                                                                                       | 21517      |
|          | #31 Fatty liver*                                                                                                               | 91695      |
|          | #32 Non alcoholic fatty liver disease                                                                                          | 24306      |
|          | #33 Non-alcoholic fatty liver disease                                                                                          | 24306      |
|          | #34 Nonalcoholic fatty liver disease                                                                                           | 30008      |
|          | #35 Nonalcoholic fatty liver*                                                                                                  | 28553      |
|          | #36 Nonalcoholic steatohepati*                                                                                                 | 12617      |
|          | #37 #2 OR #3 OR #4 OR #5 OR #6 OR #7 OR #8 OR #9 OR #10                                                                        | 212888     |
|          | #38 #11 OR #12 OR #13 OR #14 OR #15 OR #16 OR #17 OR #18 OR #19 OR #20 OR #21 OR #22 OR #23 OR #24 OR #25 OR #26 OR #27 OR #28 | 70866      |
|          | #39 #37 AND #38                                                                                                                | 7174       |
|          | #40 #1 OR #39                                                                                                                  | 7549       |
|          | #41 #29 OR #30 OR #31 OR #32 OR #33 OR #34 OR #35 OR #36                                                                       | 106373     |

| Database       | Search algorithm |                                                                                                                            | Item found  |
|----------------|------------------|----------------------------------------------------------------------------------------------------------------------------|-------------|
|                | #42              | #40 AND #41                                                                                                                | 247         |
|                | #43              | #37 AND #41                                                                                                                | 1363        |
|                | #44              | #38 AND #41                                                                                                                | 723         |
|                | #45              | #42 OR #43 OR #44                                                                                                          | <b>1851</b> |
| Web of science | #1               | synbiotics                                                                                                                 | 1012        |
|                | #2               | probiotics                                                                                                                 | 20980       |
|                | #3               | Lactobacillus*                                                                                                             | 45704       |
|                | #4               | Bifidobacterium*                                                                                                           | 10065       |
|                | #5               | "Enterococcus faecium"                                                                                                     | 7074        |
|                | #6               | "Streptococcus thermophiles"                                                                                               | 28          |
|                | #7               | "Bacillus clausii"                                                                                                         | 164         |
|                | #8               | "Saccharomyces cerevisiae"                                                                                                 | 154122      |
|                | #9               | "Saccharomyces boulardii"                                                                                                  | 1430        |
|                | #10              | "Escherichia coli Nissle 1917"                                                                                             | 230         |
|                | #11              | prebiotics                                                                                                                 | 8551        |
|                | #12              | FOS                                                                                                                        | 41104       |
|                | #13              | Fructooligosaccharide*                                                                                                     | 2162        |
|                | #14              | Fructo-oligosaccharide*                                                                                                    | 1478        |
|                | #15              | GOS                                                                                                                        | 4244        |
|                | #16              | Galactooligosaccharide*                                                                                                    | 837         |
|                | #17              | Galacto-oligosaccharide*                                                                                                   | 1069        |
|                | #18              | XOS                                                                                                                        | 429         |
|                | #19              | Xylooligosaccharide*                                                                                                       | 1071        |
|                | #20              | Xylo-oligosaccharide*                                                                                                      | 714         |
|                | #21              | TOS                                                                                                                        | 3514        |
|                | #22              | Transgalactooligosaccharide*                                                                                               | 20          |
|                | #23              | Trans-galactooligosaccharide*                                                                                              | 17          |
|                | #24              | Inulin                                                                                                                     | 9367        |
|                | #25              | Lactitol                                                                                                                   | 456         |
|                | #26              | Lactulose                                                                                                                  | 4046        |
|                | #27              | Lactosucrose                                                                                                               | 95          |
|                | #28              | Soy oligosaccharide*                                                                                                       | 277         |
|                | #29              | NAFLD                                                                                                                      | 12007       |
|                | #30              | NASH                                                                                                                       | 29926       |
|                | #31              | Fatty liver*                                                                                                               | 68564       |
|                | #32              | Non alcoholic fatty liver disease                                                                                          | 9793        |
|                | #33              | Non-alcoholic fatty liver disease                                                                                          | 9654        |
|                | #34              | Nonalcoholic fatty liver disease                                                                                           | 13373       |
|                | #35              | Nonalcoholic fatty liver*                                                                                                  | 14054       |
|                | #36              | Nonalcoholic steatohepati*                                                                                                 | 11947       |
|                | #37              | #10 OR #9 OR #8 OR #7 OR #6 OR #5 OR #4 OR #3 OR #2                                                                        | 216781      |
|                | #38              | #28 OR #27 OR #26 OR #25 OR #24 OR #23 OR #22 OR #21 OR #20 OR #19 OR #18 OR #17 OR #16 OR #15 OR #14 OR #13 OR #12 OR #11 | 71702       |
|                | #39              | #38 AND #37                                                                                                                | 4246        |
|                | #40              | #39 OR #1                                                                                                                  | 4637        |
|                | #41              | #36 OR #35 OR #34 OR #33 OR #32 OR #31 OR #30 OR #29                                                                       | 97922       |



| Database | Search algorithm |                                                                                                                            | Item found  |
|----------|------------------|----------------------------------------------------------------------------------------------------------------------------|-------------|
|          | #42              | #41 AND #40                                                                                                                | 92          |
|          | #43              | #41 AND #37                                                                                                                | 859         |
|          | #44              | #38 AND #41                                                                                                                | 347         |
|          | #45              | #42 OR #43 OR #44                                                                                                          | <b>1153</b> |
| EMBASE   | #1               | 'synbiotics':ti, ab, kw                                                                                                    | 868         |
|          | #2               | 'probiotics':ti, ab, kw                                                                                                    | 17, 624     |
|          | #3               | 'Lactobacillus*':ti, ab, kw                                                                                                | 31, 164     |
|          | #4               | 'Bifidobacterium*':ti, ab, kw                                                                                              | 8, 372      |
|          | #5               | 'Enterococcus faecium':ti, ab, kw                                                                                          | 5, 893      |
|          | #6               | 'Streptococcus thermophiles':ti, ab, kw                                                                                    | 27          |
|          | #7               | 'Bacillus clausii' :ti, ab, kw                                                                                             | 140         |
|          | #8               | 'Saccharomyces cerevisiae':ti, ab, kw                                                                                      | 70, 981     |
|          | #9               | 'Saccharomyces boulardii':ti, ab, kw                                                                                       | 855         |
|          | #10              | Escherichia coli Nissle 1917':ti, ab, kw                                                                                   | 230         |
|          | #11              | 'prebiotics':ti, ab, kw                                                                                                    | 5, 753      |
|          | #12              | 'FOS':ti, ab, kw                                                                                                           | 32, 474     |
|          | #13              | 'Fructooligosaccharide*':ti, ab, kw                                                                                        | 1, 189      |
|          | #14              | 'Fructo-oligosaccharide*':ti, ab, kw                                                                                       | 79          |
|          | #15              | 'GOS':ti, ab, kw                                                                                                           | 4, 719      |
|          | #16              | 'Galactooligosaccharide*':ti, ab, kw                                                                                       | 585         |
|          | #17              | 'Galacto-oligosaccharide*':ti, ab, kw                                                                                      | 682         |
|          | #18              | 'XOS':ti, ab, kw                                                                                                           | 255         |
|          | #19              | 'Xylooligosaccharide*':ti, ab, kw                                                                                          | 659         |
|          | #20              | 'Xylo-oligosaccharide*':ti, ab, kw                                                                                         | 324         |
|          | #21              | 'TOS':ti, ab, kw                                                                                                           | 3, 268      |
|          | #22              | 'Transgalactooligosaccharide*':ti, ab, kw                                                                                  | 13          |
|          | #23              | 'Trans-galactooligosaccharide*':ti, ab, kw                                                                                 | 14          |
|          | #24              | 'Inulin':ti, ab, kw                                                                                                        | 9, 324      |
|          | #25              | 'Lactitol':ti, ab, kw                                                                                                      | 377         |
|          | #26              | 'Lactulose':ti, ab, kw                                                                                                     | 5, 192      |
|          | #27              | 'Lactosucrose':ti, ab, kw                                                                                                  | 71          |
|          | #28              | 'Soy oligosaccharide*':ti, ab, kw                                                                                          | 12          |
|          | #29              | 'NAFLD':ti, ab, kw                                                                                                         | 20, 334     |
|          | #30              | 'NASH':ti, ab, kw                                                                                                          | 13, 786     |
|          | #31              | 'Fatty liver*':ti, ab, kw                                                                                                  | 37, 760     |
|          | #32              | 'Non alcoholic fatty liver disease':ti, ab, kw                                                                             | 12, 940     |
|          | #33              | 'Non-alcoholic fatty liver disease':ti, ab, kw                                                                             | 12, 789     |
|          | #34              | 'Nonalcoholic fatty liver disease':ti, ab, kw                                                                              | 11, 890     |
|          | #35              | 'Nonalcoholic fatty liver*':ti, ab, kw                                                                                     | 12, 391     |
|          | #36              | 'Nonalcoholic steatohepati*':ti, ab, kw                                                                                    | 6, 883      |
|          | #37              | #2 OR #3 OR #4 OR #5 OR #6 OR #7 OR #8 OR #9 OR #10                                                                        | 120, 090    |
|          | #38              | #11 OR #12 OR #13 OR #14 OR #15 OR #16 OR #17 OR #18 OR #19 OR #20 OR #21 OR #22 OR #23 OR #24 OR #25 OR #26 OR #27 OR #28 | 60, 856     |
|          | #39              | #37 AND #38                                                                                                                | 2, 833      |
|          | #40              | #1 OR #39                                                                                                                  | 3, 179      |
|          | #41              | #29 OR #30 OR #31 OR #32 OR #33 OR #34 OR #35 OR #36                                                                       | 47, 513     |

| Database       | Search algorithm |                                                                                                                            | Item found |
|----------------|------------------|----------------------------------------------------------------------------------------------------------------------------|------------|
|                | #42              | #40 AND #41                                                                                                                | 50         |
|                | #43              | #37 AND #41                                                                                                                | 283        |
|                | #44              | #38 AND #41                                                                                                                | 186        |
|                | #45              | #42 OR #43 OR #44                                                                                                          | <b>437</b> |
| CINAHL<br>Plus | #1               | synbiotics                                                                                                                 | 266        |
|                | #2               | probiotics                                                                                                                 | 6, 898     |
|                | #3               | Lactobacillus*                                                                                                             | 2, 886     |
|                | #4               | Bifidobacterium*                                                                                                           | 1, 216     |
|                | #5               | “Enterococcus faecium”                                                                                                     | 574        |
|                | #6               | “Streptococcus thermophiles”                                                                                               | 6          |
|                | #7               | “Bacillus clausii”                                                                                                         | 5          |
|                | #8               | “Saccharomyces cerevisiae”                                                                                                 | 293        |
|                | #9               | “Saccharomyces boulardii”                                                                                                  | 96         |
|                | #10              | “Escherichia coli Nissle 1917”                                                                                             | 14         |
|                | #11              | prebiotics                                                                                                                 | 1, 692     |
|                | #12              | FOS                                                                                                                        | 1, 000     |
|                | #13              | Fructooligosaccharide*                                                                                                     | 112        |
|                | #14              | Fructo-oligosaccharide*                                                                                                    | 112        |
|                | #15              | GOS                                                                                                                        | 490        |
|                | #16              | Galactooligosaccharide*                                                                                                    | 52         |
|                | #17              | Galacto-oligosaccharide*                                                                                                   | 77         |
|                | #18              | XOS                                                                                                                        | 9          |
|                | #19              | Xylooligosaccharide*                                                                                                       | 16         |
|                | #20              | Xylo-oligosaccharide*                                                                                                      | 5          |
|                | #21              | TOS                                                                                                                        | 382        |
|                | #22              | Transgalactooligosaccharide*                                                                                               | 1          |
|                | #23              | Trans-galactooligosaccharide*                                                                                              | 2          |
|                | #24              | Inulin                                                                                                                     | 443        |
|                | #25              | Lactitol                                                                                                                   | 18         |
|                | #26              | Lactulose                                                                                                                  | 430        |
|                | #27              | Lactosucrose                                                                                                               | 2          |
|                | #28              | Soy oligosaccharide*                                                                                                       | 22         |
|                | #29              | NAFLD                                                                                                                      | 1, 847     |
|                | #30              | NASH                                                                                                                       | 876        |
|                | #31              | Fatty liver*                                                                                                               | 7, 559     |
|                | #32              | Non alcoholic fatty liver disease                                                                                          | 1, 072     |
|                | #33              | Non-alcoholic fatty liver disease                                                                                          | 1062       |
|                | #34              | Nonalcoholic fatty liver disease                                                                                           | 2, 639     |
|                | #35              | Nonalcoholic fatty liver*                                                                                                  | 2, 780     |
|                | #36              | Nonalcoholic steatohepati*                                                                                                 | 873        |
|                | #37              | #2 OR #3 OR #4 OR #5 OR #6 OR #7 OR #8 OR #9 OR #10                                                                        | 9, 298     |
|                | #38              | #11 OR #12 OR #13 OR #14 OR #15 OR #16 OR #17 OR #18 OR #19 OR #20 OR #21 OR #22 OR #23 OR #24 OR #25 OR #26 OR #27 OR #28 | 4, 290     |
|                | #39              | #37 AND #38                                                                                                                | 1, 175     |
|                | #40              | #1 OR #39                                                                                                                  | 1, 270     |
|                | #41              | #29 OR #30 OR #31 OR #32 OR #33 OR #34 OR #35 OR #36                                                                       | 7, 961     |

| Database         | Search algorithm |                                                                                                                            | Item found |
|------------------|------------------|----------------------------------------------------------------------------------------------------------------------------|------------|
|                  | #42              | #40 AND #41                                                                                                                | 27         |
|                  | #43              | #37 AND #41                                                                                                                | 128        |
|                  | #44              | #38 AND #41                                                                                                                | 63         |
|                  | #45              | #42 OR #43 OR #44                                                                                                          | <b>167</b> |
| Cochrane Library | #1               | synbiotics                                                                                                                 | 356        |
|                  | #2               | probiotics                                                                                                                 | 3509       |
|                  | #3               | Lactobacillus*                                                                                                             | 3283       |
|                  | #4               | Bifidobacterium*                                                                                                           | 1636       |
|                  | #5               | "Enterococcus faecium"                                                                                                     | 127        |
|                  | #6               | "Streptococcus thermophiles"                                                                                               | 13         |
|                  | #7               | "Bacillus clausii"                                                                                                         | 21         |
|                  | #8               | "Saccharomyces cerevisiae"                                                                                                 | 160        |
|                  | #9               | "Saccharomyces boulardii"                                                                                                  | 211        |
|                  | #10              | "Escherichia coli Nissle 1917"                                                                                             | 32         |
|                  | #11              | prebiotics                                                                                                                 | 795        |
|                  | #12              | FOS                                                                                                                        | 375        |
|                  | #13              | Fructooligosaccharide*                                                                                                     | 347        |
|                  | #14              | Fructo-oligosaccharide*                                                                                                    | 347        |
|                  | #15              | GOS                                                                                                                        | 574        |
|                  | #16              | Galactooligosaccharide*                                                                                                    | 240        |
|                  | #17              | Galacto-oligosaccharide*                                                                                                   | 240        |
|                  | #18              | XOS                                                                                                                        | 16         |
|                  | #19              | Xylooligosaccharide*                                                                                                       | 22         |
|                  | #20              | Xylo-oligosaccharide*                                                                                                      | 22         |
|                  | #21              | TOS                                                                                                                        | 469        |
|                  | #22              | Transgalactooligosaccharide*                                                                                               | 6          |
|                  | #23              | Trans-galactooligosaccharide*                                                                                              | 6          |
|                  | #24              | Inulin                                                                                                                     | 777        |
|                  | #25              | Lactitol                                                                                                                   | 128        |
|                  | #26              | Lactulose                                                                                                                  | 1223       |
|                  | #27              | Lactosucrose                                                                                                               | 2          |
|                  | #28              | Soy oligosaccharide*                                                                                                       | 22         |
|                  | #29              | NAFLD                                                                                                                      | 1011       |
|                  | #30              | NASH                                                                                                                       | 1282       |
|                  | #31              | Fatty liver*                                                                                                               | 3279       |
|                  | #32              | Non alcoholic fatty liver disease                                                                                          | 1126       |
|                  | #33              | Non-alcoholic fatty liver disease                                                                                          | 1093       |
|                  | #34              | Nonalcoholic fatty liver disease                                                                                           | 1486       |
|                  | #35              | Nonalcoholic fatty liver*                                                                                                  | 1650       |
|                  | #36              | Nonalcoholic steatohepati*                                                                                                 | 675        |
|                  | #37              | #10 OR #9 OR #8 OR #7 OR #6 OR #5 OR #4 OR #3 OR #2                                                                        | 5565       |
|                  | #38              | #28 OR #27 OR #26 OR #25 OR #24 OR #23 OR #22 OR #21 OR #20 OR #19 OR #18 OR #17 OR #16 OR #15 OR #14 OR #13 OR #12 OR #11 | 3957       |
|                  | #39              | #38 AND #37                                                                                                                | 747        |
|                  | #40              | #39 OR #1                                                                                                                  | 893        |
|                  | #41              | #36 OR #35 OR #34 OR #33 OR #32 OR #31 OR #30 OR #29                                                                       | 2472       |

| <b>Database</b> | <b>Search algorithm</b> |                   | <b>Item found</b> |
|-----------------|-------------------------|-------------------|-------------------|
|                 | #42                     | #41 AND #40       | 27                |
|                 | #43                     | #41 AND #37       | 62                |
|                 | #44                     | #38 AND #41       | 37                |
|                 | #45                     | #42 OR #43 OR #44 | <b>256</b>        |

## Appendix 2: General characteristics of interventions

**Table S2** General characteristics of interventions

| <b>Intervention</b> | <b>General characteristics</b>                                                                                                |
|---------------------|-------------------------------------------------------------------------------------------------------------------------------|
| Prebiotics          | Fructooligosaccharide, Inulin, Oligofructose                                                                                  |
| Probiotics          | <i>Lactobacillus</i> spp., <i>Bifidobacterium</i> spp., <i>Streptococcus thermophiles</i> ,<br><i>Pediococcus pentosaceus</i> |
| Synbiotics          | The composition of prebiotics and probiotics                                                                                  |

### Appendix 3: Description of interventions of each included study

**Table S3** Description of interventions

| ID | Author, year         | Population      | Intervention | Detail of intervention                                                                                                                                                                                                                                                                                                                                                                                                                                                                                | N  | Treatment duration |
|----|----------------------|-----------------|--------------|-------------------------------------------------------------------------------------------------------------------------------------------------------------------------------------------------------------------------------------------------------------------------------------------------------------------------------------------------------------------------------------------------------------------------------------------------------------------------------------------------------|----|--------------------|
| 1  | Aller R, 2011        | Adults, NAFLD   | Probiotics   | 500 million of <i>Lactobacillus bulgaricus</i> and <i>Streptococcus thermophilus</i><br>1 tablet/day                                                                                                                                                                                                                                                                                                                                                                                                  | 14 | 12 weeks           |
|    |                      |                 | Placebo      | Indistinguishable placebo                                                                                                                                                                                                                                                                                                                                                                                                                                                                             | 14 |                    |
| 2  | Vajro P, 2011        | Children, NAFLD | Probiotics   | Oral <i>Lactobacillus rhamnosus</i> Strain GG<br>12 billion CFU/day                                                                                                                                                                                                                                                                                                                                                                                                                                   | 10 | 8 weeks            |
|    |                      |                 | Placebo      | Indistinguishable placebo                                                                                                                                                                                                                                                                                                                                                                                                                                                                             | 10 |                    |
| 3  | Malaguarnera M, 2012 | Adults, NASH    | Synbiotics   | <i>Bifidobacterium longum</i> and FOS 2.5 g<br>Vitamin B1 1.4 mg, Vitamin B2 1.6 mg, Vitamin B6 2.0 mg, and Vitamin B12 1.0 mg<br>1 tablet/day                                                                                                                                                                                                                                                                                                                                                        | 34 | 24 weeks           |
|    |                      |                 | Placebo      | Vitamin B1 1.4 mg, Vitamin B2 1.6 mg, Vitamin B6 2.0 mg, and Vitamin B12 1.0 mg                                                                                                                                                                                                                                                                                                                                                                                                                       | 32 |                    |
| 4  | Wong VW, 2013        | Adults, NASH    | Probiotics   | <i>Lactobacillus plantarum</i> , <i>Lactobacillus delbrueckii</i> ssp. <i>bulgaricus</i> , <i>Lactobacillus acidophilus</i> , <i>Lactobacillus rhamnosus</i> , and <i>Bifidobacterium bifidum</i><br>10 g/day                                                                                                                                                                                                                                                                                         | 10 | 24 weeks           |
|    |                      |                 | Placebo      | Indistinguishable placebo                                                                                                                                                                                                                                                                                                                                                                                                                                                                             | 10 |                    |
| 5  | Alisi A, 2014        | Children, NAFLD | Probiotics   | Eight probiotics strains ( <i>Streptococcus thermophilus</i> , <i>Bifidobacteria</i> [ <i>B. breve</i> , <i>B. infantis</i> , and <i>B. longum</i> ], <i>Lactobacillus acidophilus</i> [ <i>L. plantarum</i> , <i>L. paracasei</i> , and <i>L. delbrueckii</i> subsp. <i>bulgaricus</i> ])<br>1 sachet/day or 2 sachet/day for >10 years old children                                                                                                                                                 | 22 | 16 weeks           |
|    |                      |                 | Placebo      | Indistinguishable placebo                                                                                                                                                                                                                                                                                                                                                                                                                                                                             | 22 |                    |
| 6  | Eslamparast T, 2014  | Adults, NAFLD   | Synbiotics   | Synbiotics capsule (Protexin) contained 200 million of 7 strains of bacteria [ <i>Lactobacillus casei</i> , <i>Lactobacillus rhamnosus</i> , <i>Streptococcus thermophilus</i> , <i>Bifidobacterium breve</i> , <i>Lactobacillus acidophilus</i> , <i>Bifidobacterium longum</i> , and <i>Lactobacillus bulgaricus</i> ]<br>+ Prebiotics [fructooligosaccharide] + Probiotics cultures [magnesium stearate (source: mineral and vegetable) and a vegetable capsule (hydroxypropyl methyl cellulose)]. | 26 | 28 weeks           |
|    |                      |                 | Placebo      | Indistinguishable placebo                                                                                                                                                                                                                                                                                                                                                                                                                                                                             | 26 |                    |

| ID | Author, year       | Population      | Intervention | Detail of intervention                                                                                                                                                                                                                                                                                                                                                                                                                                                                    | N  | Treatment duration |
|----|--------------------|-----------------|--------------|-------------------------------------------------------------------------------------------------------------------------------------------------------------------------------------------------------------------------------------------------------------------------------------------------------------------------------------------------------------------------------------------------------------------------------------------------------------------------------------------|----|--------------------|
| 7  | Miccheli A, 2015   | Children, NAFLD | Probiotics   | VSL#3 1 sachet/day or 2 sachet/day for >10 years old children                                                                                                                                                                                                                                                                                                                                                                                                                             | 15 | 16 weeks           |
|    |                    |                 | Placebo      | Indistinguishable placebo                                                                                                                                                                                                                                                                                                                                                                                                                                                                 | 16 |                    |
| 8  | Spideh A, 2015     | Adults, NAFLD   | Probiotics   | <i>Lactobacillus casei</i> , <i>Lactobacillus acidophilus</i> , <i>Lactobacillus rhamnosus</i> , <i>Lactobacillus bulgaricus</i> , <i>Bifidobacterium breve</i> , <i>Bifidobacterium longum</i> , and <i>Streptococcus thermophilus</i><br>1 capsule/day                                                                                                                                                                                                                                  | 21 | 8 weeks            |
|    |                    |                 | Placebo      | Indistinguishable placebo                                                                                                                                                                                                                                                                                                                                                                                                                                                                 | 21 |                    |
| 9  | Akbarzadeh Z, 2016 | Adults, NAFLD   | Prebiotics   | 10 g psyllium<br>1 capsule/day                                                                                                                                                                                                                                                                                                                                                                                                                                                            | 38 | 10 weeks           |
|    |                    |                 | Placebo      | 10 g crashed wheat                                                                                                                                                                                                                                                                                                                                                                                                                                                                        | 37 |                    |
| 10 | Asgharian A, 2016  | Adults, NAFLD   | Synbiotics   | 500 mg capsule containing 7 species of bacteria ( <i>Lactobacillus casei</i> , <i>Lactobacillus acidophilus</i> , <i>Lactobacillus rhamnosus</i> , <i>Lactobacillus bulgaricus</i> , <i>Bifidobacterium breve</i> , <i>Bifidobacterium longum</i> , and <i>Streptococcus thermophiles</i> ), and Prebiotics (fructooligosaccharides)<br>1 capsule/day                                                                                                                                     | 38 | 8 weeks            |
|    |                    |                 | Placebo      | Placebo capsule containing 120 mg starch, similar in shape and appearance                                                                                                                                                                                                                                                                                                                                                                                                                 | 36 |                    |
| 11 | Ekhlasi G, 2016    | Adults, NAFLD   | Synbiotic    | Each symbiotic capsule contained <i>Lactobacillus casei</i> , <i>Lactobacillus rhamnosus</i> , <i>Streptococcus thermophilus</i> , <i>Bifidobacterium breve</i> , <i>Lactobacillus acidophilus</i> , <i>Bifidobacterium longum</i> , <i>Lactobacillus bulgaricus</i> , and prebiotic (fructooligosaccharide). The concentration of each probiotic strain was $2 \times 10^8$ CFU/g per capsule. Synbiotic supplements were administered as 2 capsules per day orally after the main meal. | 15 | 8 weeks            |
|    |                    |                 | Placebo      | Two identical-appearing placebo capsules (corn starch, Zahravi Pharmaceutical Co.,) were taken daily by participants assigned to placebo group.                                                                                                                                                                                                                                                                                                                                           | 15 |                    |
| 12 | Ferolla SM, 2016   | Adults, NASH    | Synbiotics   | 5 g of the synbiotics which consisted of 4 g of dietary fiber (partially hydrolyzed guar gum and inulin) and $1 \times 10^8$ CFU of <i>L. reuteri</i><br>1 capsule twice daily                                                                                                                                                                                                                                                                                                            | 27 | 12 weeks           |
|    |                    |                 | Placebo      | Indistinguishable placebo                                                                                                                                                                                                                                                                                                                                                                                                                                                                 | 23 |                    |
| 13 | Asgharian A, 2017  | Adults, NAFLD   | Synbiotics   | 500 mg capsule containing 7 species of probiotics bacteria ( <i>Lactobacillus casei</i> , <i>Lactobacillus acidophilus</i> , <i>Lactobacillus rhamnosus</i> , <i>Lactobacillus bulgaricus</i> , <i>Bifidobacterium breve</i> , <i>Bifidobacterium longum</i> , <i>Streptococcus thermophiles</i> ) and fructooligosaccharides<br>1 capsule/day                                                                                                                                            | 38 | 8 weeks            |

| ID | Author, year       | Population      | Intervention | Detail of intervention                                                                                                                                                                                                                                                                                                                   | N  | Treatment duration |
|----|--------------------|-----------------|--------------|------------------------------------------------------------------------------------------------------------------------------------------------------------------------------------------------------------------------------------------------------------------------------------------------------------------------------------------|----|--------------------|
|    |                    |                 | Placebo      | A placebo capsule containing 120 mg starch similar in shape and appearance                                                                                                                                                                                                                                                               | 36 |                    |
| 14 | Behrouz V, 2017    | Adults, NAFLD   | Probiotics   | Probiotics capsule contained 5 billion of 5 bacterial strains ( <i>Lactobacillus casei</i> , <i>Lactobacillus rhamnosus</i> , <i>Lactobacillus acidophilus</i> , <i>Bifidobacterium longum</i> , and <i>Bifidobacterium breve</i> ) plus 8 gr prebiotics placebo (maltodextrin)<br>1 probiotic capsule +1 prebiotics placebo twice daily | 30 | 12 weeks           |
|    |                    |                 | Prebiotics   | Oligofructose plus 8 gr probiotics placebo (maltodextrin)<br>1 prebiotic capsule + 1 probiotics placebo twice daily                                                                                                                                                                                                                      | 29 |                    |
|    |                    |                 | Placebo      | 2 capsule of placebo (maltodextrin) twice daily                                                                                                                                                                                                                                                                                          | 30 |                    |
| 15 | Famouri F, 2017    | Children, NAFLD | Probiotics   | <i>Lactobacillus acidophilus</i> 3x10 <sup>9</sup> CFU, <i>Bifidobacterium lactis</i> 6x10 <sup>9</sup> CFU, <i>Bifidobacterium bifidum</i> 2x10 <sup>9</sup> CFU and <i>Lactobacillus rhamnosus</i> 2x10 <sup>9</sup> CFU<br>1 capsule/day                                                                                              | 32 | 12 weeks           |
|    |                    |                 | Placebo      | Indistinguishable placebo                                                                                                                                                                                                                                                                                                                | 32 |                    |
| 16 | Javadi L, 2017 (1) | Adults, NAFLD   | Synbiotics   | <i>Bifidobacterium longum</i> and <i>Lactobacillus acidophilus</i> 2x10 <sup>7</sup> capsule 250 mg/day plus inulin 10 g/day twice daily                                                                                                                                                                                                 | 17 | 12 weeks           |
|    |                    |                 | Probiotics   | <i>Bifidobacterium longum</i> and <i>Lactobacillus acidophilus</i> 2x10 <sup>7</sup> capsule 250 mg/day plus maltodextrin powder 5 g twice daily                                                                                                                                                                                         | 20 |                    |
|    |                    |                 | Prebiotics   | Inulin powder 10 g/day plus fat and lactose free milk capsule twice daily                                                                                                                                                                                                                                                                | 19 |                    |
|    |                    |                 | Placebo      | Maltodextrin powder plus fat and lactose free milk capsule twice daily                                                                                                                                                                                                                                                                   | 19 |                    |
| 17 | Javadi L, 2017 (2) | Adults, NAFLD   | Synbiotics   | <i>Bifidobacterium longum</i> and <i>Lactobacillus acidophilus</i> 2x10 <sup>7</sup> capsule 250 mg/day plus inulin 10 g/day twice daily                                                                                                                                                                                                 | 17 | 12 weeks           |
|    |                    |                 | Probiotics   | <i>Bifidobacterium longum</i> and <i>Lactobacillus acidophilus</i> 2x10 <sup>7</sup> capsule 250 mg/day plus maltodextrin powder 5 g twice daily                                                                                                                                                                                         | 20 |                    |
|    |                    |                 | Prebiotics   | Inulin powder 10 g/day plus fat and lactose free milk capsule twice daily                                                                                                                                                                                                                                                                | 19 |                    |
|    |                    |                 | Placebo      | Maltodextrin powder plus fat and lactose free milk capsule twice daily                                                                                                                                                                                                                                                                   | 19 |                    |
| 18 | Manzhalii E, 2017  | Adults, NASH    | Synbiotics   | Lactiale® containing <i>Lactobacillus casei</i> , <i>L. rhamnosus</i> , <i>L. bulgaris</i> , <i>Bifidobacterium longum</i> , and <i>Streptococcus thermophilus</i> (108 bacteria/capsule in total) and fructooligosaccharides<br>1 capsule/day                                                                                           | 38 | 12 weeks           |
|    |                    |                 | Placebo      | Indistinguishable placebo                                                                                                                                                                                                                                                                                                                | 37 |                    |



| ID | Author, year             | Population    | Intervention | Detail of intervention                                                                                                                                                                                                                                                                                                                                                                                                                                                                                              | N  | Treatment duration |
|----|--------------------------|---------------|--------------|---------------------------------------------------------------------------------------------------------------------------------------------------------------------------------------------------------------------------------------------------------------------------------------------------------------------------------------------------------------------------------------------------------------------------------------------------------------------------------------------------------------------|----|--------------------|
| 19 | Mofidi F, 2017           | Adults, NAFLD | Synbiotics   | Synbiotics capsule contained 200 million bacteria of seven strains ( <i>Lactobacillus casei</i> , <i>Lactobacillus rhamnosus</i> , <i>Streptococcus thermophilus</i> , <i>Bifidobacterium breve</i> , <i>Lactobacillus acidophilus</i> , <i>Bifidobacterium longum</i> , and <i>Lactobacillus bulgaricus</i> ) and prebiotics (125 mg fructooligosaccharide) and probiotics cultures (magnesium stearate (source: mineral and vegetable) and a vegetable capsule (hydroxypropylmethyl cellulose))                   | 21 | 28 weeks           |
|    |                          |               | Placebo      | Maltodextrin                                                                                                                                                                                                                                                                                                                                                                                                                                                                                                        | 21 |                    |
| 20 | Monem SMA, 2017          | Adults, NASH  | Probiotics   | Acidophilus capsule; <i>Lactobacillus acidophilus</i> 2 billion viable organism<br>1 tablet 3 times/day 30 minutes before meal                                                                                                                                                                                                                                                                                                                                                                                      | 15 | 4 weeks            |
|    |                          |               | Placebo      | Mixture of rice flour, gelatin, and magnesium stearate in tablet                                                                                                                                                                                                                                                                                                                                                                                                                                                    | 15 |                    |
| 21 | Bakhshimoghaddam F, 2018 | Adults, NAFLD | Synbiotics   | The synbiotic yogurt contained 10 <sup>8</sup> CFUs <i>Streptococcus thermophilus</i> and <i>Lactobacillus delbrueckii</i> subsp. <i>Bulgaricus</i> , <i>Bifidobacterium animalis</i> subsp. <i>lactis</i> (BB-12)/mL as a probiotic and 1.5 g inulin as a prebiotic.                                                                                                                                                                                                                                               | 34 | 24 weeks           |
|    |                          |               | Placebo      | The yogurts were specially prepared for this study by the West Azarbaijan Pegah Dairy Company (Urmia, Iran).                                                                                                                                                                                                                                                                                                                                                                                                        | 34 |                    |
| 22 | Ahn SB, 2019             | Adults, NAFLD | Probiotic    | A probiotic mixture of <i>L. acidophilus</i> CBT LA1, <i>L. rhamnosus</i> CBT LR5 isolated from Korean human feces, <i>L. paracasei</i> CBT LPC5 isolated from Korean fermented food (jeotgal), <i>P. pentosaceus</i> CBT SL4 isolated from a Korean fermented vegetable product (kimchi), <i>B. lactis</i> CBT BL3, and <i>B. breve</i> CBT BR3 isolated from Korean infant feces was used. The probiotic mixture contained 109 CFU/1.4 g.                                                                         | 30 | 12 weeks           |
|    |                          |               | Placebo      | The placebo was composed of dextran, maltodextrin, lemon flavor, and Mg stearate.                                                                                                                                                                                                                                                                                                                                                                                                                                   | 35 |                    |
| 23 | Duseja A, 2019           | Adults, NAFLD | Probiotic    | Two capsules t.i.d. (Each capsule containing 112.5 billion live, lyophilised, lactic acid bacteria and bifidobacteria, namely <i>Lactobacillus paracasei</i> DSM 24733, <i>Lactobacillus plantarum</i> DSM 24730, <i>Lactobacillus acidophilus</i> DSM 24735, and <i>Lactobacillus delbrueckii</i> subsp. <i>bulgaricus</i> DSM 24734, <i>Bifidobacterium longum</i> DSM 24736, <i>Bifidobacterium infantis</i> DSM 24737, <i>Bifidobacterium breve</i> DSM 24732, and <i>Streptococcus thermophilus</i> DSM 24731. | 17 | 48 weeks           |
|    |                          |               | Placebo      | Two placebo capsules t.i.d. (capsules containing microcrystalline cellulose).                                                                                                                                                                                                                                                                                                                                                                                                                                       | 13 |                    |
| 24 | Abhari K, 2020           | Adults, NAFLD | Synbiotic    | One synbiotic capsule containing 109 spore of <i>B. coagulans</i> (GBI-30) plus 0.4 g inulin per day.                                                                                                                                                                                                                                                                                                                                                                                                               | 22 | 12 weeks           |
|    |                          |               | Placebo      | Maltodextrin                                                                                                                                                                                                                                                                                                                                                                                                                                                                                                        | 24 |                    |

| ID | Author, year    | Population    | Intervention | Detail of intervention                                                                                                                                                                                                                                                                                                                                                           | N  | Treatment duration |
|----|-----------------|---------------|--------------|----------------------------------------------------------------------------------------------------------------------------------------------------------------------------------------------------------------------------------------------------------------------------------------------------------------------------------------------------------------------------------|----|--------------------|
| 25 | Behrouz V, 2020 | Adults, NAFLD | Probiotic    | Each probiotic capsule contained 5 billion of five bacterial strains ( <i>Lactobacillus casei</i> , <i>Lactobacillus rhamnosus</i> , <i>Lactobacillus acidophilus</i> , <i>Bifidobacterium longum</i> , and <i>Bifidobacterium breve</i> ).                                                                                                                                      | 30 | 12 weeks           |
|    |                 |               | Prebiotic    | Oligofructose                                                                                                                                                                                                                                                                                                                                                                    | 29 |                    |
|    |                 |               | Placebo      | Maltodextrin                                                                                                                                                                                                                                                                                                                                                                     | 30 |                    |
| 26 | Chong PL, 2021  | Adults, NAFLD | Probiotic    | VSL#3® (Danisco Inc.) contained 8 different strains of live freeze-dried lactic acid bacteria ( <i>Streptococcus thermophilus</i> , <i>Bifidobacterium breve</i> , <i>Bifidobacterium longum</i> , <i>Bifidobacterium infantis</i> , <i>Lactobacillus acidophilus</i> , <i>Lactobacillus plantarum</i> , <i>Lactobacillus paracasei</i> , and <i>Lactobacillus bulgaricus</i> ). | 19 | 10 weeks           |
|    |                 |               | Placebo      | Placebo                                                                                                                                                                                                                                                                                                                                                                          | 16 |                    |

FOS, fructooligosaccharide; g, gram; mg, milligram; N, number of patients; NAFL, non-alcoholic fatty liver; NASH, non-alcoholic steatohepatitis

#### Appendix 4: Baseline characteristics of included studies

**Table S4** Baseline characteristics of patients with non-alcoholic fatty liver disease

| ID | Author, year         | Population      | Intervention | Age (years)    | AST (IU/L)      | ALT (IU/L)      | BMI (kg/m <sup>2</sup> ) | WC (cm)         | TC (mg/dL)      | TG (mg/dL)       | LDL (mg/dL)     | HDL (mg/dL)    | FBS (mg/dL)      | HOMA-IR      |
|----|----------------------|-----------------|--------------|----------------|-----------------|-----------------|--------------------------|-----------------|-----------------|------------------|-----------------|----------------|------------------|--------------|
|    |                      |                 |              | Mean (SD)      | Mean (SD)       | Mean (SD)       | Mean (SD)                | Mean (SD)       | Mean (SD)       | Mean (SD)        | Mean (SD)       | Mean (SD)      | Mean (SD)        | Mean (SD)    |
| 1  | Aller R, 2011        | Adults, NAFLD   | Probiotics   | 49.4<br>(10.9) | 41.3<br>(15.5)  | 67.7<br>(25.1)  | 30.2<br>(4.5)            | -               | 194.8<br>(49.1) | 171.1<br>(95.4)  | 110.3<br>(39.9) | 43.0<br>(11.9) | 116.0<br>(25.4)  | 4.5<br>(2.6) |
|    |                      |                 | Placebo      | 44.3<br>(15.1) | 31.7<br>(13.1)  | 60.7<br>(32.1)  | 29.5<br>(5.5)            | -               | 192.7<br>(38.6) | 134.8<br>(51.8)  | 125.6<br>(32.3) | 40.1<br>(6.7)  | 110.0<br>(28.5)  | 4.2<br>(3.2) |
| 2  | Vajro P, 2011        | Children, NAFLD | Probiotics   | 10.7<br>(2.1)  | 41.6<br>(16.5)  | 70.3<br>(34.8)  | -                        | -               | 157.0<br>(29.9) | 96.9<br>(9.7)    | -               | -              | -                | -            |
|    |                      |                 | Placebo      |                |                 | 63.6<br>(18.5)  | -                        | -               |                 |                  | -               | -              | -                | -            |
| 3  | Malaguarnera M, 2012 | Adults, NASH    | Synbiotics   | 46.9<br>(5.4)  | 109.0<br>(23.2) | 101.0<br>(24.7) | 27.3<br>(1.36)           | 93.2<br>(5.2)   | 210.4<br>(30.9) | 212.6<br>(71.7)  | 151.2<br>(29.8) | 40.6<br>(29.8) | 107.2<br>(13.3)  | 3.7<br>(0.5) |
|    |                      |                 | Placebo      | 46.7<br>(5.7)  | 107.1<br>(21.4) | 96.1<br>(24.2)  | 27.2<br>(1.32)           | 93.4<br>(5.1)   | 207.3<br>(30.6) | 209.0<br>(77.1)  | 147.3<br>(30.2) | 41.8<br>(30.2) | 107.9<br>(12.1)  | 3.7<br>(0.5) |
| 4  | Wong VW, 2013        | Adults, NASH    | Probiotics   | 42.0<br>(9.0)  | 50.0<br>(25.0)  | 96.0<br>(75.0)  | 30.2<br>(5.0)            | 101.0<br>(10.0) | 185.6<br>(30.9) | 209.7<br>(129.5) | 100.5<br>(23.2) | 46.4<br>(7.7)  | 109.9<br>(25.2)  | -            |
|    |                      |                 | Placebo      | 55.0<br>(9.0)  | 38.0<br>(15.0)  | 72.0<br>(30.0)  | 28.7<br>(5.7)            | 97.0<br>(14.0)  | 193.4<br>(38.7) | 169.3<br>(99.0)  | 108.3<br>(34.8) | 50.3<br>(15.5) | 157.3<br>(166.7) | -            |
| 5  | Alisi A, 2014        | Children, NAFLD | Probiotics   | 10.4<br>(2.4)  | 59.2<br>(15.1)  | 34.0<br>(4.7)   | 27.1<br>(0.1)            | -               | 156.0<br>(30.1) | 99.0<br>(18.8)   | 85.2<br>(23.8)  | 45.4<br>(11.9) | 84.7<br>(9.5)    | 4.3<br>(1.4) |
|    |                      |                 | Placebo      | 11.0<br>(1.6)  | 63.4<br>(16.6)  | 42.0<br>(4.7)   | 25.6<br>(0.1)            | -               | 156.7<br>(34.9) | 98.0<br>(14.1)   | 94.5<br>(24.6)  | 48.0<br>(9.5)  | 83.9<br>(8.7)    | 4.7<br>(1.9) |
| 6  | Eslamparast T, 2014  | Adults, NAFLD   | Synbiotics   | 46.4<br>(8.8)  | 66.4<br>(2.6)   | 69.3<br>(2.3)   | 32.1<br>(2.4)            | 102.4<br>(6.8)  | -               | -                | -               | -              | 99.6<br>(24.2)   | 2.8<br>(1.0) |
|    |                      |                 | Placebo      | 45.7<br>(9.5)  | 68.3<br>(9.4)   | 71.5<br>(9.1)   | 31.3<br>(2.3)            | 102.8<br>(6.2)  | -               | -                | -               | -              | 98.9<br>(21.4)   | 2.7<br>(1.2) |
| 7  | Miccheli A, 2015     | Children, NAFLD | Probiotics   | 10.4<br>(2.5)  | 62.6<br>(12.9)  | 24.9<br>(9.0)   | 26.6<br>(2.9)            | -               | 165.4<br>(36.2) | 86.0<br>(42.1)   | 87.7<br>(31.5)  | 45.5<br>(13.1) | 82.6<br>(7.5)    | 3.6<br>(1.8) |

| ID | Author, year       | Population    | Intervention | Age (years)    | AST (IU/L)      | ALT (IU/L)      | BMI (kg/m <sup>2</sup> ) | WC (cm)         | TC (mg/dL)      | TG (mg/dL)       | LDL (mg/dL)     | HDL (mg/dL)    | FBS (mg/dL)       | HOMA-IR        |
|----|--------------------|---------------|--------------|----------------|-----------------|-----------------|--------------------------|-----------------|-----------------|------------------|-----------------|----------------|-------------------|----------------|
|    |                    |               |              | Mean (SD)      | Mean (SD)       | Mean (SD)       | Mean (SD)                | Mean (SD)       | Mean (SD)       | Mean (SD)        | Mean (SD)       | Mean (SD)      | Mean (SD)         | Mean (SD)      |
|    |                    |               | Placebo      | 11.0<br>(1.6)  | 64.0<br>(16.3)  | 34.3<br>(14.6)  | 25.4<br>(4.3)            | -               | 165.6<br>(40.6) | 87.0<br>(40.6)   | 100.0<br>(31.7) | 47.7<br>(8.1)  | 83.7<br>(9.8)     | 4.2<br>(3.0)   |
| 8  | Sepideh A, 2015    | Adults, NAFLD | Probiotics   | 42.1<br>(2.0)  | -               | -               | 30.3<br>(1.2)            | 98.1<br>(2.4)   | -               | -                | -               | -              | 98.0<br>(3.7)     | 2.7<br>(0.4)   |
|    |                    |               | Placebo      | 47.3<br>(2.5)  | -               | -               | 29.5<br>(0.8)            | 99.6<br>(2.4)   | -               | -                | -               | -              | -                 | 97.8<br>(3.9)  |
| 9  | Akbarzadeh Z, 2016 | Adults, NAFLD | Prebiotics   | 46.1<br>(17.1) | 35.7<br>(19.9)  | 46.7<br>(29.1)  | 29.4<br>(3.4)            | -               | -               | -                | -               | -              | -                 | -              |
|    |                    |               | Placebo      | 43.8<br>(11.7) | 46.3<br>(51.2)  | 68.1<br>(76.8)  | 31.1<br>(3.6)            | -               | -               | -                | -               | -              | -                 | -              |
| 10 | Asgharian A, 2016  | Adults, NAFLD | Synbiotics   | 46.6<br>(10.5) | 25.3<br>(22.6)  | 24.6<br>(13.3)  | 29.6<br>(4.7)            | 90.8<br>(10.7)  | -               | -                | -               | -              | -                 | -              |
|    |                    |               | Placebo      | 47.8<br>(10.2) | 24.1<br>(11.2)  | 26.3<br>(16.9)  | 28.2<br>(4.1)            | 88.9<br>(9.4)   | -               | -                | -               | -              | -                 | -              |
| 11 | Ekhlasi G, 2016    | Adults, NAFLD | Synbiotics   | 44.5<br>(6.7)  | 38.0<br>(15.3)  | 38.1<br>(8.7)   | 27.3<br>(2.2)            | 93.6<br>(6.5)   | 194.3<br>(24.2) | 187.5<br>(20.6)  | 140.0<br>(40.5) | 46.1<br>(30.3) | 115.7<br>(9.9)    | 0.6<br>(0.2)   |
|    |                    |               | Placebo      |                | 32.0<br>(7.1)   | 33.88<br>(4.5)  | 27.8<br>(2.0)            | 96.5<br>(7.3)   | 194.4<br>(15.9) | 182.8<br>(30.2)  | 138.3<br>(15.1) | 38.2<br>(8.3)  | 108.0<br>(14.5)   | 0.6<br>(0.2)   |
| 12 | Ferolla SM, 2016   | Adults, NASH  | Synbiotics   | 51.8<br>(37.4) | 81.5<br>(142.5) | 61.5<br>(93.1)  | 32.5<br>(4.0)            | 107.8<br>(10.8) | 205.4<br>(34.6) | 201.3<br>(178.5) | 125.2<br>(28.0) | 44.9<br>(10.3) | 158.0<br>(154.1)  | -              |
|    |                    |               | Placebo      |                | 52.8<br>(117.9) | 61.6<br>(104.1) | 32.5<br>(4.0)            | 104.0<br>(13.6) | 190.9<br>(42.5) | 275.3<br>(427.5) | 109.3<br>(32.7) | 46.7<br>(11.7) | 161.7<br>(154.08) | -              |
| 13 | Asgharian A, 2017  | Adults, NAFLD | Synbiotics   | 46.6<br>(10.5) | -               | -               | 29.6<br>(4.7)            | 90.8<br>(10.7)  | 203.1<br>(8.0)  | 162.6<br>(11.9)  | 121.6<br>(6.8)  | 45.4<br>(1.9)  | 97.5<br>(1.5)     | -              |
|    |                    |               | Placebo      | 47.8<br>(10.2) | -               | -               | 28.2<br>(4.1)            | 88.9<br>(9.4)   | 187.4<br>(6.6)  | 174.7<br>(20.5)  | 104.7<br>(6.1)  | 45.3<br>(1.8)  | 101.5<br>(2.4)    | -              |
| 14 | Behrouz V, 2017    | Adults, NAFLD | Probiotics   | 38.5<br>(7.1)  | -               | -               | 29.6<br>(2.5)            | -               | -               | -                | -               | -              | 91.5<br>(9.9)     | 3.8<br>(2.1)   |
|    |                    |               | Prebiotics   | 38.4<br>(9.2)  | -               | -               | 30.8<br>(4.7)            | -               | -               | -                | -               | -              | -                 | 95.3<br>(17.7) |

| ID | Author, year       | Population    | Intervention | Age (years) | AST (IU/L)  | ALT (IU/L)  | BMI (kg/m <sup>2</sup> ) | WC (cm)     | TC (mg/dL)   | TG (mg/dL)    | LDL (mg/dL)  | HDL (mg/dL) | FBS (mg/dL) | HOMA-IR   |   |
|----|--------------------|---------------|--------------|-------------|-------------|-------------|--------------------------|-------------|--------------|---------------|--------------|-------------|-------------|-----------|---|
|    |                    |               |              | Mean (SD)   | Mean (SD)   | Mean (SD)   | Mean (SD)                | Mean (SD)   | Mean (SD)    | Mean (SD)     | Mean (SD)    | Mean (SD)   | Mean (SD)   | Mean (SD) |   |
|    |                    |               | Placebo      | 38.4 (10.1) | -           | -           | 31.9 (5.0)               | -           | -            | -             | -            | -           | 98.3 (24.2) | 4.7 (5.9) |   |
| 15 | Famouri F, 2017    | Adults, NAFLD | Probiotics   | 12.7 (2.2)  | 32.2 (15.7) | 32.8 (19.6) | 26.4 (4.3)               | 82.2 (14.7) | 157.3 (57.1) | 112.5 (50.5)  | 87.9 (28.7)  | 46.3 (12.1) | -           | -         |   |
|    |                    |               | Placebo      | 12.6 (1.7)  | 30.2 (12.9) | 28.7 (13.7) | 26.6 (2.3)               | 81.4 (6.8)  | 108.0 (24.3) | 96.0 (20.7)   | 79.3 (14.2)  | 34.5 (4.6)  | -           | -         |   |
| 16 | Javadi L, 2017 (1) | Adults, NAFLD | Synbiotics   | 43.2 (7.0)  | 51.6 (10.9) | 58.1 (13.8) | 32.3 (4.8)               | -           | -            | -             | -            | -           | -           | -         | - |
|    |                    |               | Probiotics   | 43.9 (9.0)  | 45.9 (14.5) | 51.2 (13.6) | 29.9 (3.9)               | -           | -            | -             | -            | -           | -           | -         | - |
|    |                    |               | Prebiotics   | 38.7 (10.0) | 42.7 (10.0) | 49.1 (11.8) | 31.0 (4.4)               | -           | -            | -             | -            | -           | -           | -         | - |
|    |                    |               | Placebo      | 42.2 (9.1)  | 43.6 (13.2) | 50.2 (11.0) | 30.4 (2.9)               | -           | -            | -             | -            | -           | -           | -         | - |
| 17 | Javadi L, 2017 (2) | Adults, NAFLD | Synbiotics   | 43.2 (7.0)  | -           | -           | 32.3 (4.8)               | -           | 204.4 (32.8) | 190.6 (66.4)  | 121.0 (27.9) | 42.3 (12.0) | 101.8 (5.4) | 1.5 (0.7) |   |
|    |                    |               | Probiotics   | 43.9 (9.0)  | -           | -           | 29.9 (3.9)               | -           | 194.2 (32.5) | 165.9 (54.2)  | 118.5 (37.5) | 42.0 (8.3)  | 102.6 (7.8) | 1.2 (0.4) |   |
|    |                    |               | Prebiotics   | 38.7 (10.0) | -           | -           | 31.0 (4.4)               | -           | 189.5 (29.1) | 172.1 (73.1)  | 115.0 (24.9) | 40.3 (1.3)  | 100.2 (9.6) | 1.1 (0.5) |   |
|    |                    |               | Placebo      | 42.2 (9.1)  | -           | -           | 30.4 (2.9)               | -           | 188.9 (23.8) | 150.1 (45.7)  | 114.6 (22.6) | 38.3 (8.0)  | 101.1 (6.4) | 1.1 (0.4) |   |
| 18 | Manzhalii E, 2017  | Adults, NASH  | Synbiotics   | 44.3 (9.3)  | 43.1 (12.9) | 56.8 (17.3) | 26.4 (4.9)               | -           | 282.3 (47.7) | 129.3 (114.7) | -            | 51.8 (95.4) | 88.7 (65.0) | -         |   |
|    |                    |               | Placebo      | 43.5 (7.9)  | 41.9 (11.6) | 52.4 (17.6) | 26.6 (4.3)               | -           | 274.6 (47.7) | 122.3 (97.0)  | -            | 53.0 (89.4) | 90.4 (60.2) | -         |   |
| 19 | Mofidi, 2017       | Adults, NAFLD | Synbiotics   | 40.1 (11.4) | 63.6 (2.8)  | 72.3 (5.1)  | 23.2 (1.0)               | 92.0 (4.2)  | -            | -             | -            | -           | -           | -         |   |
|    |                    |               | Placebo      | 44.6 (10.1) | 72.7 (2.6)  | 81.3 (3.7)  | 23.2 (1.1)               | 89.4 (6.1)  | -            | -             | -            | -           | -           | -         |   |

| ID | Author, year           | Population    | Intervention | Age (years) | AST (IU/L)    | ALT (IU/L)    | BMI (kg/m <sup>2</sup> ) | WC (cm)      | TC (mg/dL)   | TG (mg/dL)    | LDL (mg/dL)  | HDL (mg/dL) | FBS (mg/dL)  | HOMA-IR     |
|----|------------------------|---------------|--------------|-------------|---------------|---------------|--------------------------|--------------|--------------|---------------|--------------|-------------|--------------|-------------|
|    |                        |               |              | Mean (SD)   | Mean (SD)     | Mean (SD)     | Mean (SD)                | Mean (SD)    | Mean (SD)    | Mean (SD)     | Mean (SD)    | Mean (SD)   | Mean (SD)    | Mean (SD)   |
| 20 | Monem SMA, 2017        | Adults, NASH  | Probiotics   | 44.2 (5.5)  | 44.05 (14.65) | 81.45 (23.32) | 32.6 (1.2)               | -            | 258.6 (31.7) | 257.8 (55.02) | 158.5 (23.7) | 48.7 (4.8)  | 104.9 (21.3) | -           |
|    |                        |               | Placebo      | 44.3 (5.6)  | 42.73 (9.95)  | 83.53 (12.01) | 33.1 (1.3)               | -            | 250.5 (45.1) | 245.3 (70.8)  | 154.7 (33.2) | 48.8 (5.0)  | 107.1 (27.1) | -           |
| 21 | Bakhshimogadam F, 2018 | Adults, NAFLD | Synbiotics   | 38.8 (9.0)  | 24.6 (6.6)    | 34.8 (17.2)   | -                        | -            | 195.3 (34.7) | 165.7 (60.9)  | 113.8 (25.5) | 49.2 (11.0) | 89.8 (7.9)   | 3.7 (1.1)   |
|    |                        |               | Placebo      | 41.1 (8.5)  | 22.9 (8.1)    | 32.4 (17.1)   | -                        | -            | 195.0 (40.5) | 155.7 (53.8)  | 113.9 (27.9) | 47.5 (10.4) | 89.8 (8.5)   | 4.7 (1.6)   |
| 22 | Ahn SB, 2019           | Adults, NAFLD | Probiotic    | 41.7 (12.5) | 33.6 (21.0)   | 41.10 (24.52) | 30.1 (22.4)              | -            | 201.3 (33.8) | 187.4 (118.3) | -            | 46.6 (33.5) | 112.7 (72.0) | 93.2 (36.7) |
|    |                        |               | Placebo      | 44.7 (13.3) | 32.0 (17.8)   | 41.70 (21.64) | 30.1 (22.5)              | -            | 196.7 (40.8) | 172.8 (108.2) | -            | 47.4 (37.1) | 100.0 (71.9) | 56.2 (35.9) |
| 23 | Duseja A, 2019         | Adults, NAFLD | Probiotic    | 38.0 (10.0) | 68.0 (32.3)   | 101.1 (48.0)  | -                        | -            | 180.0 (49.0) | 205.0 (137.0) | 102.0 (38.0) | 40.0 (9.0)  | 98.0 (15.0)  | -           |
|    |                        |               | Placebo      | 33.0 (6.0)  | 74.2 (30.1)   | 105.5 (51.0)  | -                        | -            | 172.0 (43.0) | 146.0 (58.0)  | 107.0 (37.0) | 40.0 (7.0)  | 96.0 (16.0)  | -           |
| 24 | Abhari K, 2020         | Adults, NAFLD | Synbiotics   | 47.7 (11.4) | 40.3 (20.5)   | 41.9 (18.1)   | 32.3 (6.7)               | 103.8 (10.9) | 224.9 (49.6) | 161.7 (54.6)  | 149.3 (47.9) | 39.5 (7.4)  | 105.5 (17.7) | 3.5 (1.3)   |
|    |                        |               | Placebo      | 46.7 (12.4) | 33.3 (12.4)   | 36.7 (18.8)   | 35.5 (5.3)               | 106.9 (8.8)  | 211.0 (31.8) | 168.9 (57.9)  | 137.0 (33.3) | 40.0 (3.3)  | 104.4 (23.4) | 3.8 (1.5)   |
| 25 | Behrouz V, 2020        | Adults, NAFLD | Probiotic    | 38.5 (7.1)  | 74.4 (15.8)   | 72.5 (11.7)   | 29.3 (3.2)               | 102.5 (9.3)  | 161.1 (30.7) | 213.2 (54.4)  | 91.2 (22.7)  | 40.3 (10.1) | 89.8 (10.1)  | -           |
|    |                        |               | Prebiotic    | 38.4 (9.2)  | 74.1 (16.7)   | 76.5 (22.2)   | 30.0 (4.6)               | 108.3 (9.7)  | 165.9 (36.6) | 221.5 (78.2)  | 94.4 (32.1)  | 40.5 (7.4)  | 93.0 (14.8)  | -           |
|    |                        |               | Placebo      | 38.4 (10.1) | 66.3 (13.0)   | 63.2 (14.4)   | 31.6 (7.3)               | 108.6 (10.7) | 156.3 (27.5) | 201.1 (66.1)  | 88.3 (24.8)  | 39.3 (8.6)  | 94.5 (15.2)  | -           |
| 26 | Chong PL, 2021         | Adults, NAFLD | Probiotic    | 57.0 (8.0)  | 40.0 (16.0)   | 43.0 (44.9)   | 31.2 (7.3)               | 112.2 (14.3) | 174.4 (53.4) | 167.4 (50.5)  | 99.8 (45.6)  | 41.4 (10.1) | -            | 2.2 (1.9)   |
|    |                        |               | Placebo      | 58.0 (7.0)  | 40.0 (15.0)   | 51.0 (19.0)   | 31.9 (3.3)               | 111.2 (10.7) | 166.7 (32.9) | 186.9 (101.8) | 93.6 (27.1)  | 40.6 (13.2) | -            | 3.1 (1.8)   |

ALT, alanine aminotransferase; AST, aspartate aminotransferase; BMI, body mass index; FBS, fasting blood sugar; HDL, high- density lipoproteins; HOMA-IR, homeostatic model assessment-insulin resistance; LDL, low- density lipoproteins; NAFL, non-alcoholic fatty liver; NASH, non-alcoholic steatohepatitis; RCT, randomized controlled trial; TC, total cholesterol; TG, triglycerides; WC, waist circumference

## Appendix 5: Networks of all option comparisons for secondary outcomes

The size of the nodes is proportional to the number of participants randomized for each option. The directly compared options are linked with the line, the thickness of which corresponds to the number of trials comparing each option.

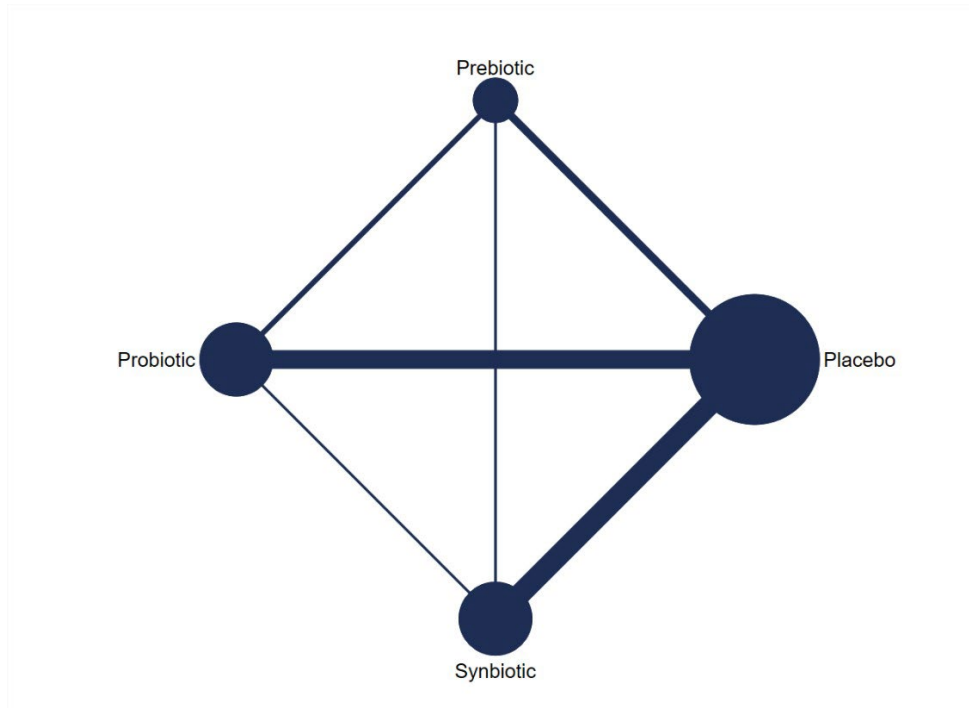

**Figure S1** Networks of all option comparisons for reduction in body mass index

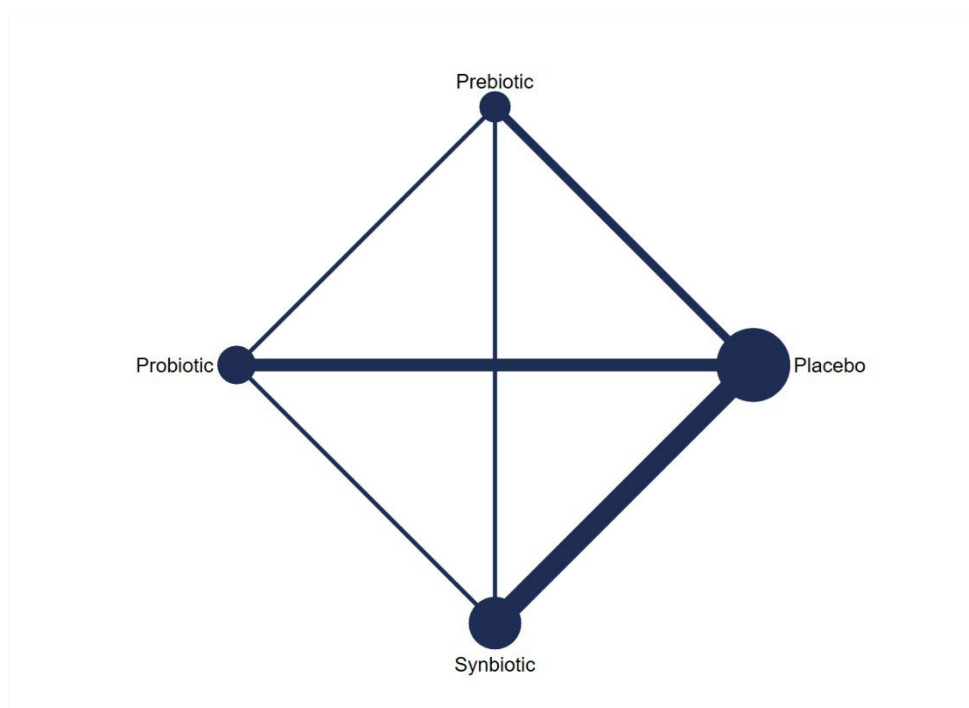

**Figure S2** Networks of all option comparisons for reduction in waist circumference



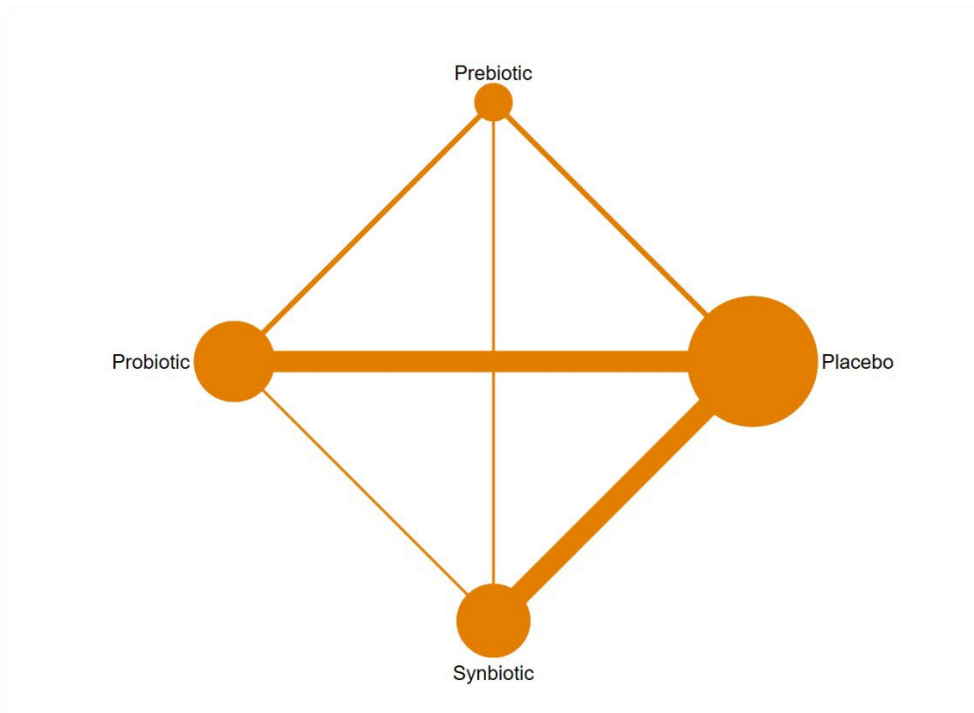

**Figure S3** Networks of all option comparisons for reduction in total cholesterol

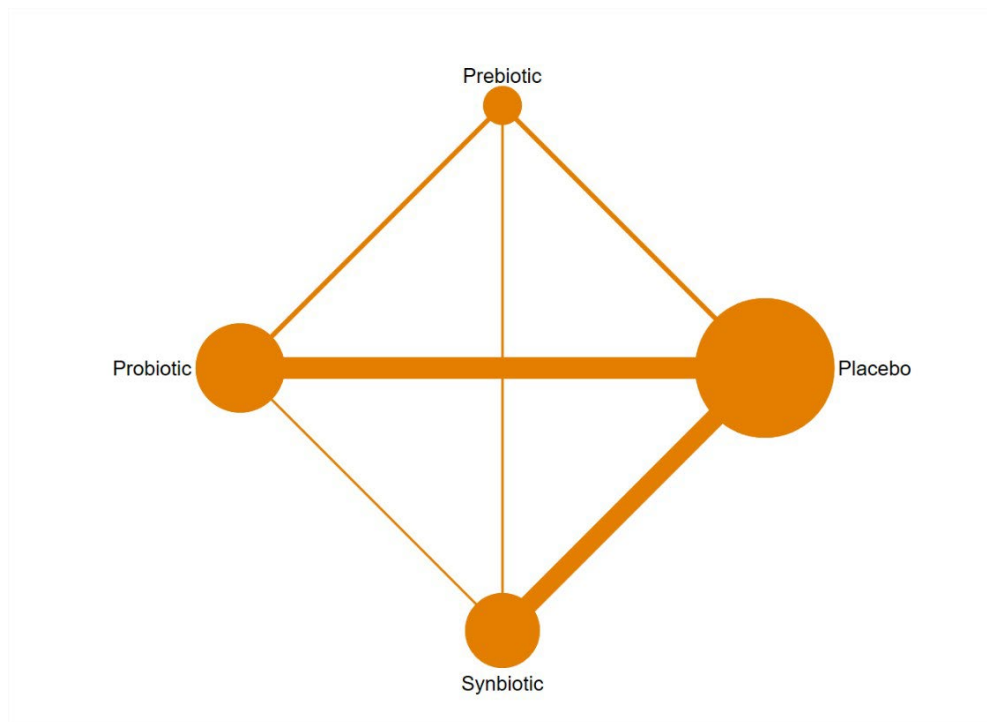

**Figure S4** Networks of all option comparisons for reduction in triglycerides

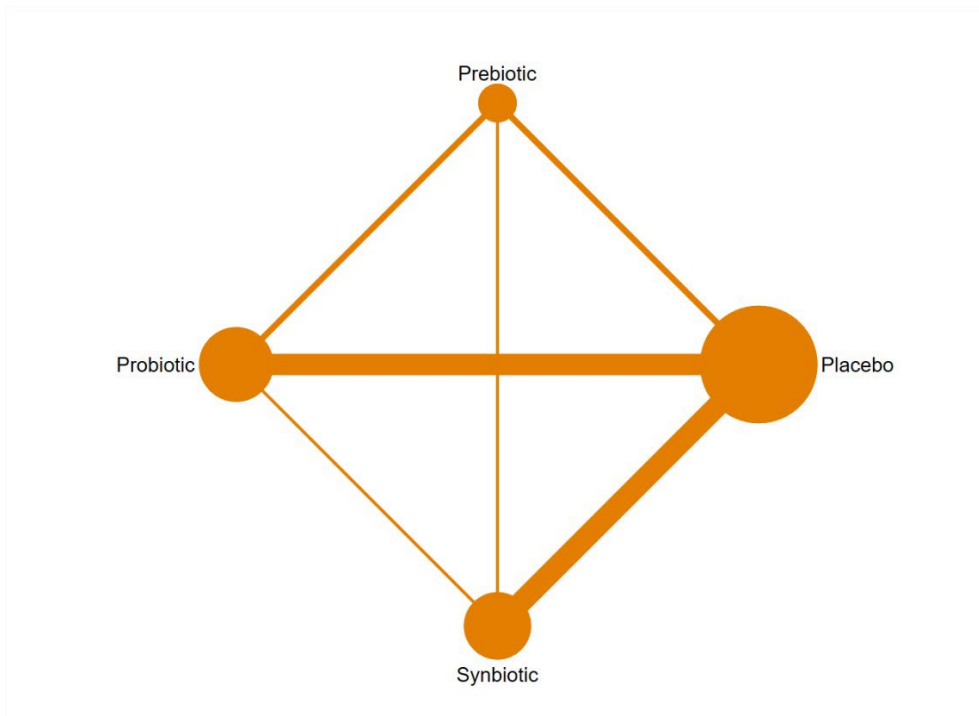

**Figure S5** Networks of all option comparisons for reduction in low-density lipoproteins

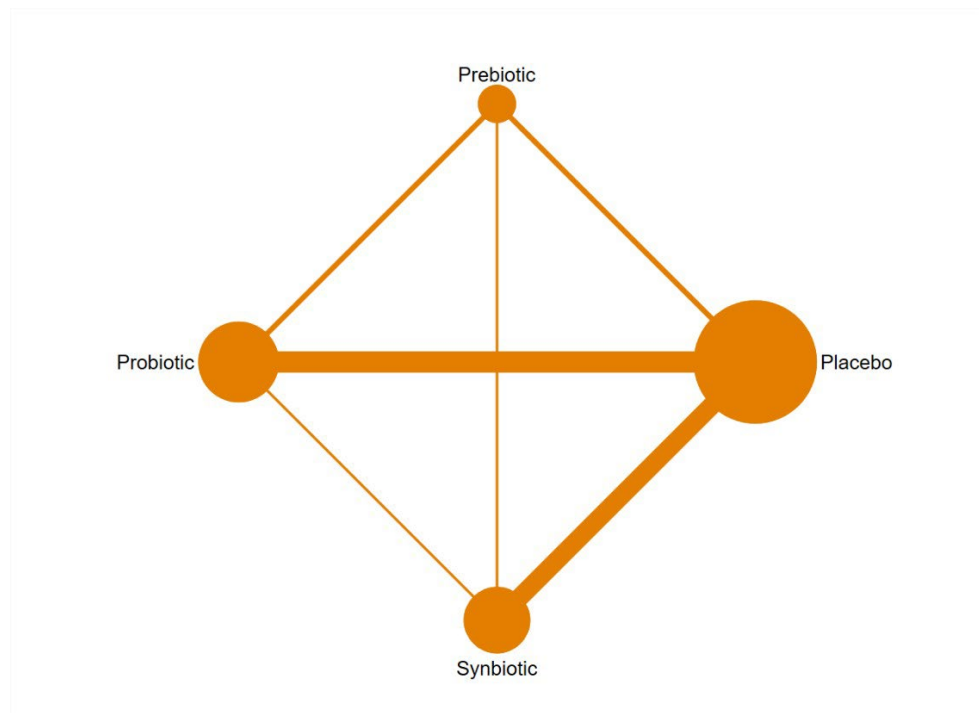

**Figure S6** Networks of all option comparisons for increasing in high-density lipoproteins.

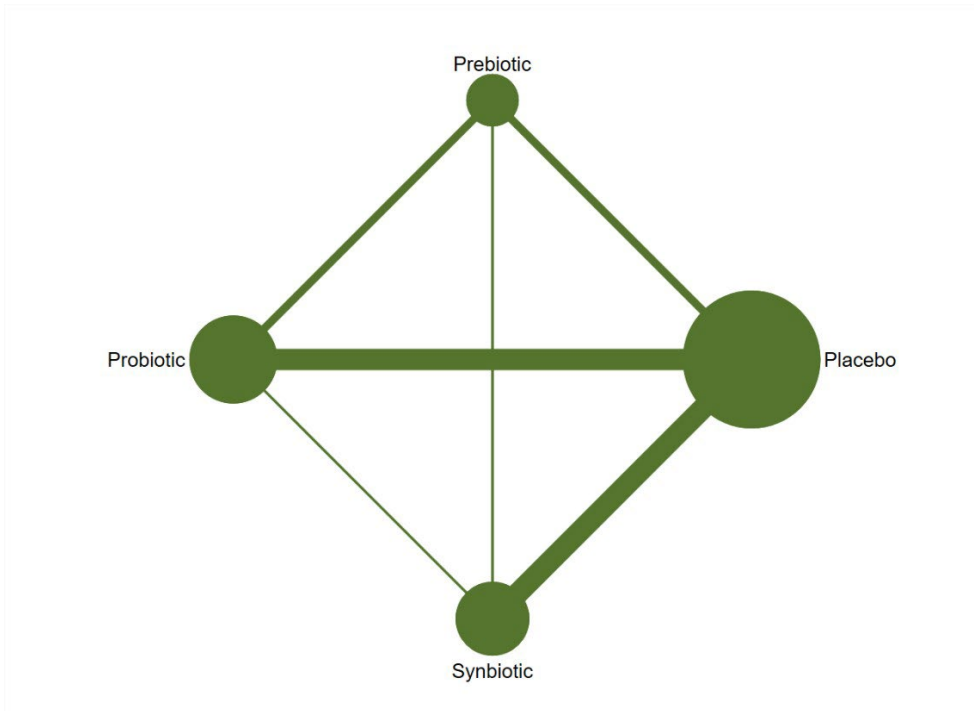

**Figure S7** Networks of all option comparisons for reduction in fasting blood sugar

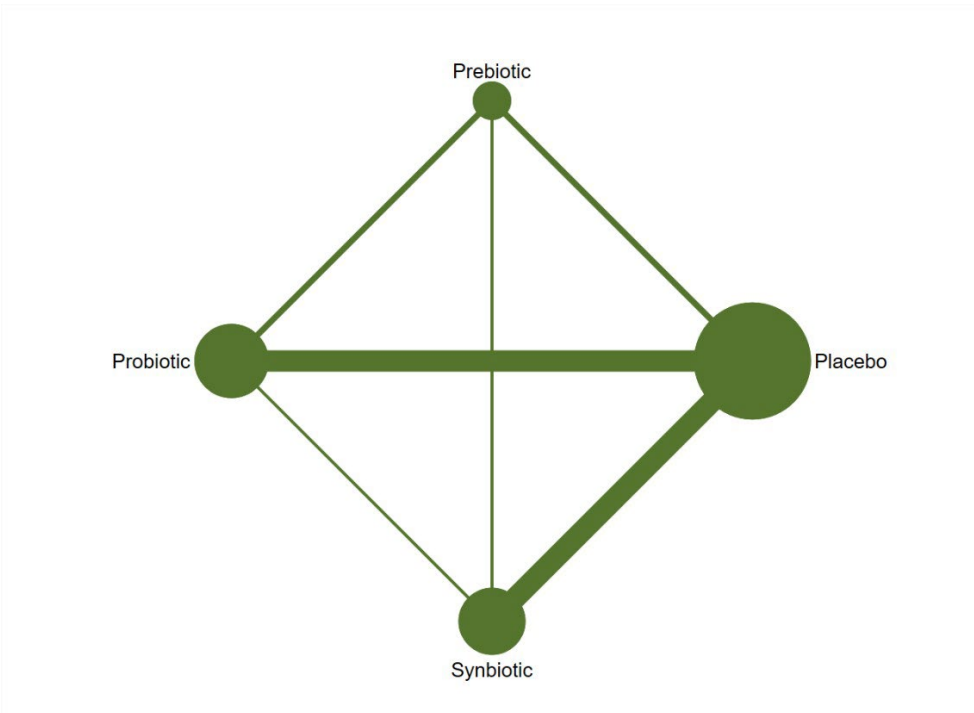

**Figure S8** Networks of all option comparisons for reduction in HOMA-IR

## Appendix 6: Risk-of-bias assessments

We assess the risk of bias by following the instruction in the Cochrane reviews. This tool addresses specific bias domains, including methods for generating the random sequence; allocation concealment; blinding of participants and investigators; blinding of the outcome assessment; incompleteness of the outcome data; and selective outcome reporting. Each item is adjudicated within each study and the results are represented in a risk-of-bias table. The adjudication of the risk of bias is achieved by answering pre-specified questions about the methods reported by each study in relation to the risk domain, such that the conclusion is either a low risk of bias, an unclear risk of bias, or a high risk of bias.

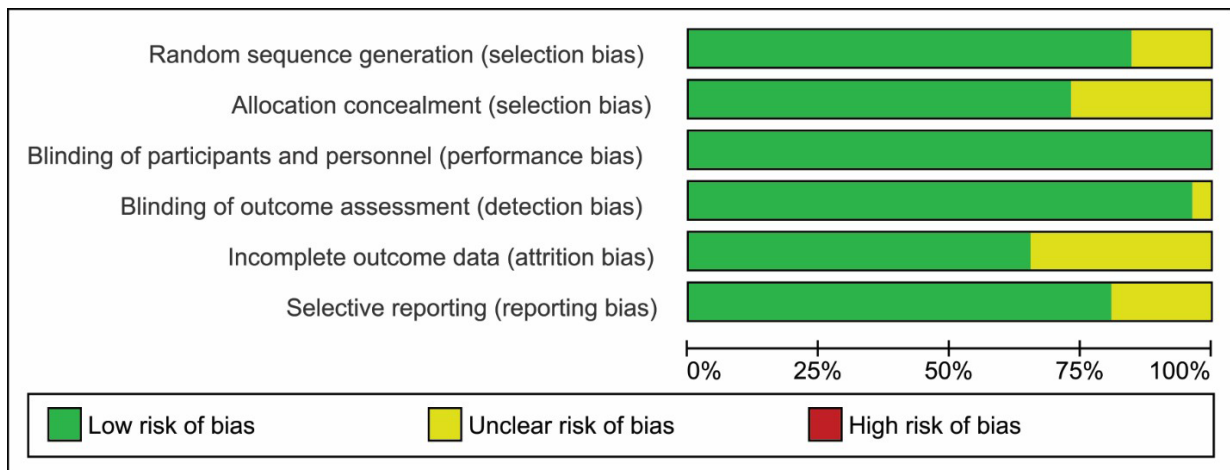

**Figure S9** Risk-of-bias summary graph

This reviews the authors' judgments (low, unclear, and high) for each risk-of-bias item shown as percentages across all included studies.

|                          | Random sequence generation (selection bias) | Allocation concealment (selection bias) | Blinding of participants and personnel (performance bias) | Blinding of outcome assessment (detection bias) | Incomplete outcome data (attrition bias) | Selective reporting (reporting bias) |
|--------------------------|---------------------------------------------|-----------------------------------------|-----------------------------------------------------------|-------------------------------------------------|------------------------------------------|--------------------------------------|
| Abhari K, 2020           | +                                           | +                                       | +                                                         | +                                               | ?                                        | +                                    |
| Ahn SB, 2019             | +                                           | +                                       | +                                                         | +                                               | ?                                        | +                                    |
| Akbarzadeh Z, 2016       | ?                                           | ?                                       | +                                                         | +                                               | ?                                        | +                                    |
| Alisi A, 2014            | +                                           | +                                       | +                                                         | +                                               | +                                        | ?                                    |
| Aller R, 2011            | +                                           | +                                       | +                                                         | +                                               | +                                        | +                                    |
| Asgharian A, 2016        | +                                           | +                                       | +                                                         | +                                               | ?                                        | +                                    |
| Asgharian A, 2017        | +                                           | +                                       | +                                                         | +                                               | ?                                        | +                                    |
| Bakhshimoghaddam F, 2018 | +                                           | ?                                       | +                                                         | +                                               | ?                                        | ?                                    |
| Behrouz V, 2017          | +                                           | ?                                       | +                                                         | +                                               | +                                        | +                                    |
| Behrouz V, 2020          | +                                           | +                                       | +                                                         | +                                               | +                                        | ?                                    |
| Chong PL, 2021           | +                                           | +                                       | +                                                         | ?                                               | +                                        | +                                    |
| Duseja A, 2019           | +                                           | +                                       | +                                                         | +                                               | +                                        | ?                                    |
| Ekhlasli G, 2016         | +                                           | ?                                       | +                                                         | +                                               | +                                        | +                                    |
| Eslamparast T, 2014      | +                                           | +                                       | +                                                         | +                                               | +                                        | ?                                    |
| Famouri F, 2017          | +                                           | +                                       | +                                                         | +                                               | +                                        | +                                    |
| Ferolla SM, 2016         | +                                           | +                                       | +                                                         | +                                               | +                                        | +                                    |
| Javadi L (1), 2017       | +                                           | +                                       | +                                                         | +                                               | +                                        | +                                    |
| Javadi L (2), 2017       | +                                           | +                                       | +                                                         | +                                               | +                                        | +                                    |
| Malaguarnera M, 2012     | ?                                           | +                                       | +                                                         | +                                               | +                                        | +                                    |
| Manzhalii E, 2017        | ?                                           | ?                                       | +                                                         | +                                               | ?                                        | +                                    |
| Miccheli A, 2015         | +                                           | +                                       | +                                                         | +                                               | +                                        | +                                    |
| Mofidi F, 2017           | +                                           | +                                       | +                                                         | +                                               | ?                                        | +                                    |
| Monem SMA, 2017          | +                                           | ?                                       | +                                                         | +                                               | +                                        | +                                    |
| Spideh A, 2015           | +                                           | +                                       | +                                                         | +                                               | ?                                        | +                                    |
| Vajro P, 2011            | ?                                           | +                                       | +                                                         | +                                               | +                                        | +                                    |
| Wong VW, 2013            | +                                           | ?                                       | +                                                         | +                                               | +                                        | +                                    |

**Figure S10** Risk-of-bias summary: judgments about each bias item for each study

## Appendix 7: Data extracted for primary outcomes of network meta-analysis

**Table S5** AST and ALT changes in patients with non-alcoholic fatty liver disease

| ID | Author, year         | Population      | Intervention | Sample size | AST (IU/L)           | ALT (IU/L)           |
|----|----------------------|-----------------|--------------|-------------|----------------------|----------------------|
|    |                      |                 |              |             | Mean difference (SD) | Mean difference (SD) |
| 1  | Aller R, 2011        | Adults, NAFLD   | Probiotics   | 14          | -5.70 (13.68)        | -7.30 (28.13)        |
|    |                      |                 | Placebo      | 14          | 4.70 (13.46)         | 4.10 (33.93)         |
| 2  | Vajro P, 2011        | Children, NAFLD | Probiotics   | 10          | -                    | -30.20 (30.51)       |
|    |                      |                 | Placebo      | 10          | -                    | -2.00 (27.66)        |
| 3  | Malaguarnera M, 2012 | Adults, NASH    | Synbiotics   | 34          | -69.60 (26.06)       | -53.90 (22.65)       |
|    |                      |                 | Placebo      | 32          | -45.90 (23.66)       | -38.00 (25.83)       |
| 4  | Wong VW, 2013        | Adults, NASH    | Probiotics   | 10          | -13.00 (31.00)       | -26.00 (91.00)       |
|    |                      |                 | Placebo      | 10          | 23.00 (31.00)        | 2.00 (41.00)         |
| 5  | Alisi A, 2014        | Children, NAFLD | Probiotics   | 22          | -                    | -1.00 (4.69)         |
|    |                      |                 | Placebo      | 22          | -                    | 8.00 (21.49)         |
| 6  | Eslamparast T, 2014  | Adults, NAFLD   | Synbiotics   | 26          | -31.30 (1.25)        | -25.10 (1.73)        |
|    |                      |                 | Placebo      | 26          | -7.90 (4.94)         | -9.50 (1.41)         |
| 7  | Miccheli A, 2015     | Children, NAFLD | Probiotics   | 15          | -28.43 (12.09)       | 1.87 (10.72)         |
|    |                      |                 | Placebo      | 16          | -12.00 (18.62)       | 7.67 (22.58)         |
| 9  | Akbarzadeh Z, 2016   | Adults, NAFLD   | Prebiotics   | 38          | -11.10 (17.29)       | -18.60 (25.49)       |
|    |                      |                 | Placebo      | 37          | -8.10 (53.82)        | -22.80 (66.61)       |
| 10 | Asgharian A, 2016    | Adults, NAFLD   | Synbiotics   | 38          | -1.02 (3.47)         | 3.13 (3.49)          |
|    |                      |                 | Placebo      | 36          | 1.78 (1.78)          | 7.17 (2.36)          |
| 11 | Ekhlasi G, 2016      | Adults, NAFLD   | Synbiotics   | 15          | -7.43 (8.58)         | -6.54 (7.66)         |
|    |                      |                 | Placebo      | 15          | 2.50 (5.75)          | 4.16 (3.43)          |
| 12 | Ferolla SM, 2016     | Adults, NASH    | Synbiotics   | 27          | 2.49 (90.91)         | -14.75 (123.41)      |
|    |                      |                 | Placebo      | 23          | 5.02 (107.51)        | 17.30 (114.37)       |
| 15 | Famouri F, 2017      | Children, NAFLD | Probiotics   | 32          | -7.90 (13.60)        | -9.70 (16.98)        |
|    |                      |                 | Placebo      | 32          | -3.60 (12.39)        | -2.70 (13.32)        |
| 16 | Javadi L, 2017 (1)   | Adults, NAFLD   | Synbiotics   | 17          | -14.47 (12.50)       | -12.29 (12.73)       |
|    |                      |                 | Probiotics   | 20          | -14.70 (12.72)       | -10.85 (13.04)       |

| ID | Author, year             | Population    | Intervention | Sample size | AST (IU/L)           | ALT (IU/L)           |
|----|--------------------------|---------------|--------------|-------------|----------------------|----------------------|
|    |                          |               |              |             | Mean difference (SD) | Mean difference (SD) |
|    |                          |               | Prebiotics   | 19          | -9.05 (9.49)         | -8.05 (11.08)        |
|    |                          |               | Placebo      | 19          | -1.94 (12.85)        | 0.21 (12.86)         |
| 18 | Manzhalii E, 2017        | Adults, NASH  | Synbiotics   | 38          | -10.40 (2.26)        | -17.80 (2.55)        |
|    |                          |               | Placebo      | 37          | 5.70 (2.79)          | -2.00 (3.00)         |
| 19 | Mofidi F, 2017           | Adults, NAFLD | Synbiotics   | 21          | -10.80 (2.29)        | -11.61 (2.89)        |
|    |                          |               | Placebo      | 21          | -1.98 (0.41)         | -5.04 (0.60)         |
| 20 | Monem SMA, 2017          | Adults, NASH  | Probiotics   | 15          | -5.85 (13.38)        | -35.35 (22.15)       |
|    |                          |               | Placebo      | 15          | 13.13 (8.62)         | -1.00 (11.30)        |
| 21 | Bakhshimoghaddam F, 2018 | Adults, NAFLD | Synbiotics   | 34          | -7.50 (6.10)         | -14.50 (15.60)       |
|    |                          |               | Placebo      | 34          | 3.10 (5.70)          | 3.10 (14.40)         |
| 22 | Ahn SB, 2019             | Adults, NAFLD | Probiotics   | 30          | -2.10 (21.62)        | -2.30 (25.99)        |
|    |                          |               | Placebo      | 35          | 0.50 (17.40)         | 2.80 (19.99)         |
| 23 | Duseja A, 2019           | Adults, NAFLD | Probiotics   | 17          | -32.00 (27.97)       | -56.00 (41.96)       |
|    |                          |               | Placebo      | 13          | -29.30 (26.29)       | -37.50 (46.71)       |
| 24 | Abhari K, 2020           | Adults, NAFLD | Synbiotics   | 22          | -9.79 (22.66)        | -11.40 (31.55)       |
|    |                          |               | Placebo      | 24          | 1.40 (26.24)         | 3.30 (23.83)         |
| 25 | Behrouz V, 2020          | Adults, NAFLD | Probiotics   | 30          | -41.82 (13.69)       | -43.00 (12.53)       |
|    |                          |               | Prebiotics   | 29          | -39.43 (14.49)       | -49.33 (19.36)       |
|    |                          |               | Placebo      | 30          | -24.59 (14.20)       | -18.59 (27.51)       |
| 26 | Chong PL, 2021           | Adults, NAFLD | Probiotics   | 19          | -2.00 (18.33)        | -5.00 (31.51)        |
|    |                          |               | Placebo      | 16          | 1.00 (16.09)         | -2.00 (23.30)        |

ALT, alanine aminotransferase; AST, aspartate aminotransferase; IU/L, international units per liter; NAFLD: non-alcoholic fatty liver disease; NASH, non-alcoholic steatohepatitis; SD, standard deviation

## Appendix 8: Data extracted for secondary outcomes of network meta-analysis

**Table S6** Body mass index and waist circumference changes in patients with non-alcoholic fatty liver disease

| ID | Author               | Population      | Intervention | Sample size | BMI (kg/m <sup>2</sup> ) | WC (cm)              |
|----|----------------------|-----------------|--------------|-------------|--------------------------|----------------------|
|    |                      |                 |              |             | Mean difference (SD)     | Mean difference (SD) |
| 1  | Aller R, 2011        | Adults, NAFLD   | Probiotics   | 14          | 0.90 (4.66)              | -                    |
|    |                      |                 | Placebo      | 14          | 0.60 (5.82)              | -                    |
| 2  | Vajro P, 2011        | Children, NAFLD | Probiotics   | 10          | -0.08 (0.31)             | -                    |
|    |                      |                 | Placebo      | 10          | -0.12 (0.25)             | -                    |
| 3  | Malaguarnera M, 2012 | Adults, NASH    | Synbiotics   | 34          | -0.90 (1.63)             | -                    |
|    |                      |                 | Placebo      | 32          | -1.30 (1.69)             | -                    |
| 4  | Wong VW, 2013        | Adults, NASH    | Probiotics   | 10          | -1.00 (2.30)             | -2.00 (6.00)         |
|    |                      |                 | Placebo      | 10          | -0.50 (1.10)             | 1.00 (4.00)          |
| 5  | Alisi A, 2014        | Children, NAFLD | Probiotics   | 22          | -2.20 (0.92)             | -                    |
|    |                      |                 | Placebo      | 22          | 0.10 (1.10)              | -                    |
| 7  | Miccheli A, 2015     | Children, NAFLD | Probiotics   | 15          | -2.70 (2.86)             | -                    |
|    |                      |                 | Placebo      | 16          | 1.73 (4.19)              | -                    |
| 9  | Akbarzadeh Z, 2016   | Adults, NAFLD   | Prebiotics   | 38          | -1.30 (3.50)             | -2.90 (7.89)         |
|    |                      |                 | Placebo      | 37          | -1.00 (3.70)             | -0.70 (8.63)         |
| 11 | Ekhlasi G, 2016      | Adults, NAFLD   | Synbiotics   | 15          | -0.14 (2.24)             | 0.26 (6.59)          |
|    |                      |                 | Placebo      | 15          | -0.04 (1.97)             | 0.07 (7.42)          |
| 12 | Ferolla SM, 2016     | Adults, NASH    | Synbiotics   | 27          | -0.40 (3.90)             | -1.90 (11.01)        |
|    |                      |                 | Placebo      | 23          | -0.20 (5.14)             | 0.90 (13.68)         |
| 13 | Asgharian A, 2017    | Adults, NAFLD   | Synbiotics   | 38          | -0.08 (0.62)             | -0.82 (1.67)         |
|    |                      |                 | Placebo      | 36          | 0.51 (2.76)              | 1.48 (1.72)          |
| 14 | Behrouz V, 2017      | Adults, NAFLD   | Probiotics   | 30          | -1.58 (2.45)             | -                    |
|    |                      |                 | Prebiotics   | 29          | -1.50 (4.70)             | -                    |
|    |                      |                 | Placebo      | 30          | -1.24 (4.88)             | -                    |
| 15 | Famouri F, 2017      | Children, NAFLD | Probiotics   | 32          | -                        | -1.90 (14.90)        |
|    |                      |                 | Placebo      | 32          | -                        | -1.40 (7.01)         |
| 16 | Javadi L, 2017 (1)   |                 | Synbiotics   | 17          | -                        | -1.00 (9.73)         |



| ID | Author             | Population    | Intervention | Sample size | BMI (kg/m <sup>2</sup> ) | WC (cm)              |
|----|--------------------|---------------|--------------|-------------|--------------------------|----------------------|
|    |                    |               |              |             | Mean difference (SD)     | Mean difference (SD) |
|    |                    | Adults, NAFLD | Probiotics   | 20          | -                        | -1.20 (8.63)         |
|    |                    |               | Prebiotics   | 19          | -                        | -2.00 (7.35)         |
|    |                    |               | Placebo      | 19          | -                        | 1.00 (5.76)          |
| 17 | Javadi L, 2017 (2) | Adults, NAFLD | Synbiotics   | 17          | -0.73 (4.68)             | -                    |
|    |                    |               | Probiotics   | 20          | 0.16 (3.74)              | -                    |
|    |                    |               | Prebiotics   | 19          | -0.58 (4.51)             | -                    |
|    |                    |               | Placebo      | 19          | 0.18 (2.88)              | -                    |
| 18 | Manzhalii E, 2017  | Adults, NASH  | Synbiotics   | 38          | -5.30 (0.72)             | -                    |
|    |                    |               | Placebo      | 37          | -2.70 (0.66)             | -                    |
| 22 | Ahn SB, 2019       | Adults, NAFLD | Probiotics   | 30          | -0.20 (3.60)             | -                    |
|    |                    |               | Placebo      | 35          | 0.30 (22.38)             | -                    |
| 24 | Abhari K, 2020     | Adults, NAFLD | Synbiotics   | 22          | -0.96 (0.86)             | -5.83 (3.78)         |
|    |                    |               | Placebo      | 24          | -0.74 (1.41)             | -3.15 (4.59)         |
| 25 | Behrouz V, 2020    | Adults, NAFLD | Probiotics   | 30          | -1.50 (7.78)             | -3.10 (5.26)         |
|    |                    |               | Prebiotics   | 29          | -1.40 (3.17)             | -3.20 (6.25)         |
|    |                    |               | Placebo      | 30          | -1.20 (7.45)             | -3.90 (2.52)         |

BMI: body mass index; cm: centimeters; kg/m<sup>2</sup>: kilogram per square meter; NAFLD: non-alcoholic fatty liver disease; NASH, non-alcoholic steatohepatitis; SD: standard deviation; WC: waist circumference

**Table S7** Lipid profile changes in patients with non-alcoholic fatty liver disease

| ID | Author               | Population      | Intervention | Sample size | TC (mg/dL)           | TG (mg/dL)           | LDL (mg/dL)          | HDL (mg/dL)          |
|----|----------------------|-----------------|--------------|-------------|----------------------|----------------------|----------------------|----------------------|
|    |                      |                 |              |             | Mean difference (SD) | Mean difference (SD) | Mean difference (SD) | Mean difference (SD) |
| 1  | Aller R, 2011        | Adults, NAFLD   | Probiotics   | 14          | 6.10 (43.37)         | -20.20 (83.70)       | 11.30 (48.09)        | 0.00 (11.75)         |
|    |                      |                 | Placebo      | 14          | 12.00 (48.25)        | 12.40 (50.28)        | 11.10 (36.06)        | 3.20 (8.03)          |
| 3  | Malaguarnera M, 2012 | Adults, NASH    | Synbiotics   | 34          | -23.20 (34.42)       | -53.20 (69.60)       | -32.50 (27.23)       | 5.03 (28.36)         |
|    |                      |                 | Placebo      | 32          | -8.10 (32.20)        | -24.20 (74.55)       | -6.90 (27.38)        | 0.78 (28.74)         |
| 4  | Wong VW, 2013        | Adults, NASH    | Probiotics   | 10          | 0.00 (15.47)         | -17.72 (83.79)       | 3.85 (23.20)         | 0.00 (3.87)          |
|    |                      |                 | Placebo      | 10          | 7.73 (19.34)         | -26.57 (30.47)       | 11.60 (19.34)        | 3.86 (3.87)          |
| 5  | Alisi A, 2014        | Children, NAFLD | Probiotics   | 22          | -                    | 11.00 (36.33)        | -                    | -                    |
|    |                      |                 | Placebo      | 22          | -                    | 4.00 (41.69)         | -                    | -                    |
| 7  | Miccheli A, 2015     | Children, NAFLD | Probiotics   | 15          | -3.50 (31.87)        | 21.50 (51.10)        | 16.80 (27.44)        | -3.10 (11.49)        |
|    |                      |                 | Placebo      | 16          | -2.00 (35.28)        | 14.67 (47.92)        | -3.33 (27.53)        | -5.00 (9.58)         |
| 11 | Ekhlasi G, 2016      | Adults, NAFLD   | Synbiotics   | 15          | -17.53 (8.91)        | -19.03 (20.40)       | -15.88 (8.71)        | 2.20 (7.05)          |
|    |                      |                 | Placebo      | 15          | 2.83 (4.19)          | 4.01 (28.71)         | 1.43 (2.67)          | 0.30 (7.14)          |
| 12 | Ferolla SM, 2016     | Adults, NASH    | Synbiotics   | 27          | 3.50 (36.65)         | 74.00 (333.10)       | 0.60 (32.41)         | -0.60 (9.68)         |
|    |                      |                 | Placebo      | 23          | 4.60 (37.93)         | 28.80 (451.06)       | -5.10 (29.55)        | -0.50 (11.15)        |
| 13 | Asgharian A, 2017    | Adults, NAFLD   | Synbiotics   | 38          | -18.05 (8.04)        | 1.39 (11.86)         | -11.55 (6.81)        | -7.36 (1.94)         |
|    |                      |                 | Placebo      | 36          | 12.59 (6.64)         | 15.29 (20.49)        | 15.27 (6.12)         | 0.75 (1.80)          |
| 15 | Famouri F, 2017      | Children, NAFLD | Probiotics   | 32          | -12.25 (53.10)       | -11.97 (47.88)       | -6.28 (26.51)        | 0.50 (11.72)         |
|    |                      |                 | Placebo      | 32          | -2.57 (23.95)        | -4.16 (19.94)        | -0.94 (13.60)        | 2.00 (8.85)          |
| 17 | Javadi L, 2017 (2)   | Adults, NAFLD   | Synbiotics   | 17          | -20.94 (37.31)       | -17.29 (68.75)       | -19.23 (29.80)       | 6.14 (10.52)         |
|    |                      |                 | Probiotics   | 20          | -10.75 (38.18)       | -13.80 (57.54)       | -19.78 (37.08)       | 5.78 (8.34)          |
|    |                      |                 | Prebiotics   | 19          | -6.31 (33.37)        | -8.84 (70.07)        | -12.35 (26.49)       | 2.94 (10.24)         |
|    |                      |                 | Placebo      | 19          | -3.47 (21.47)        | -1.10 (47.91)        | 0.58 (21.27)         | 0.32 (8.27)          |
| 18 | Manzhalii E, 2017    | Adults, NASH    | Synbiotics   | 38          | -73.50 (7.73)        | -12.40 (18.60)       | -                    | -                    |
|    |                      |                 | Placebo      | 37          | -42.56 (7.73)        | -8.86 (16.40)        | -                    | -                    |
| 19 | Mofidi F, 2017       | Adults, NAFLD   | Synbiotics   | 21          | -46.09 (55.17)       | -32.33 (46.01)       | -24.85 (53.66)       | 3.69 (7.52)          |
|    |                      |                 | Placebo      | 21          | -16.00 (21.40)       | -9.80 (10.77)        | -13.42 (10.95)       | 0.95 (3.44)          |
| 22 | Ahn SB, 2017         | Adults, NAFLD   | Probiotics   | 30          | -21.50 (117.20)      | -37.00 (104.10)      | -                    | -3.70 (32.20)        |
|    |                      |                 | Placebo      | 35          | -12.40 (38.95)       | 4.50 (107.83)        | -                    | -2.67 (36.00)        |

| ID | Author          | Population    | Intervention | Sample size | TC (mg/dL)           | TG (mg/dL)           | LDL (mg/dL)          | HDL (mg/dL)          |
|----|-----------------|---------------|--------------|-------------|----------------------|----------------------|----------------------|----------------------|
|    |                 |               |              |             | Mean difference (SD) | Mean difference (SD) | Mean difference (SD) | Mean difference (SD) |
| 24 | Abhari K, 2020  | Adults, NAFLD | Synbiotics   | 22          | -10.55 (30.96)       | -8.40 (56.83)        | -11.45 (42.11)       | 1.31 (10.34)         |
|    |                 |               | Placebo      | 24          | -5.14 (34.36)        | -10.86 (44.38)       | -2.73 (33.72)        | -0.12 (4.36)         |
| 25 | Behrouz V, 2020 | Adults, NAFLD | Probiotics   | 30          | 2.40 (28.65)         | -67.90 (51.79)       | 2.40 (24.22)         | -0.33 (8.90)         |
|    |                 |               | Prebiotics   | 29          | -11.2 (38.76)        | -68.47 (70.73)       | -8.80 (35.60)        | -1.83 (7.22)         |
|    |                 |               | Placebo      | 30          | 20.40 (29.88)        | -17.86 (140.81)      | 14.64 (25.86)        | 0.17 (9.94)          |
| 26 | Chong PL, 2021  | Adults, NAFLD | Probiotics   | 19          | -3.48 (51.37)        | 1.78 (76.95)         | -0.77 (42.87)        | 0.77 (9.69)          |
|    |                 |               | Placebo      | 16          | 7.33 (37.59)         | 24.80 (115.69)       | 3.09 (33.25)         | 0.39 (13.35)         |

HDL: high-density lipoproteins; LDL: low-density lipoproteins; mg/dL, milligram per deciliter; NAFLD: non-alcoholic fatty liver disease; NASH: non-alcoholic steatohepatitis; SD: standard deviation; TC: total cholesterol; TG: triglycerides

**Table S8** FBS and HOMA-IR changes in patients with non-alcoholic fatty liver disease

| ID | Author               | Year            | Intervention | Sample size | FBS (mg/dL)          | HOMA-IR              |
|----|----------------------|-----------------|--------------|-------------|----------------------|----------------------|
|    |                      |                 |              |             | Mean difference (SD) | Mean difference (SD) |
| 1  | Aller R, 2011        | Adults, NAFLD   | Probiotics   | 14          | -1.40 (26.85)        | -0.30 (2.51)         |
|    |                      |                 | Placebo      | 14          | -2.30 (29.07)        | 0.10 (3.30)          |
| 3  | Malaguarnera M, 2012 | Adults, NASH    | Synbiotics   | 34          | -11.71 (12.02)       | -1.10 (0.52)         |
|    |                      |                 | Placebo      | 32          | -12.20 (11.81)       | 0.60 (0.59)          |
| 4  | Wong VW, 2013        | Adults, NASH    | Probiotics   | 10          | 14.40 (52.20)        | -                    |
|    |                      |                 | Placebo      | 10          | 3.60 (12.60)         | -                    |
| 5  | Alisi A, 2014        | Children, NAFLD | Probiotics   | 22          | -                    | -1.00 (1.41)         |
|    |                      |                 | Placebo      | 22          | -                    | -1.20 (2.48)         |
| 6  | Eslamparast T, 2014  | Adults, NAFLD   | Synbiotics   | 26          | -                    | -0.68 (0.24)         |
|    |                      |                 | Placebo      | 26          | -                    | -0.39 (0.16)         |
| 7  | Miccheli A, 2015     | Children, NAFLD | Probiotics   | 15          | 3.73 (7.65)          | -0.73 (1.59)         |
|    |                      |                 | Placebo      | 16          | 2.33 (9.05)          | -0.83 (2.60)         |
| 8  | Spideh A, 2015       | Adults, NAFLD   | Probiotics   | 21          | -4.53 (3.23)         | -0.51 (0.36)         |
|    |                      |                 | Placebo      | 21          | 2.62 (3.44)          | 0.47 (0.37)          |
| 11 | Ekhlasi G, 2016      | Adults, NAFLD   | Synbiotics   | 15          | -10.97 (6.54)        | 0.12 (0.37)          |
|    |                      |                 | Placebo      | 15          | 6.90 (7.92)          | 0.10 (0.21)          |
| 12 | Ferolla SM, 2016     | Adults, NASH    | Synbiotics   | 27          | 12.01 (177.76)       | -                    |
|    |                      |                 | Placebo      | 23          | 21.22 (175.62)       | -                    |
| 13 | Asgharian A, 2017    | Adults, NAFLD   | Synbiotics   | 38          | -4.48 (1.49)         | -                    |
|    |                      |                 | Placebo      | 36          | 3.54 (2.40)          | -                    |
| 14 | Behrouz V, 2017      | Adults, NAFLD   | Probiotics   | 30          | -2.64 (10.00)        | -0.85 (2.47)         |
|    |                      |                 | Prebiotics   | 29          | -5.90 (17.23)        | -1.04 (1.69)         |
|    |                      |                 | Placebo      | 20          | -2.07 (22.60)        | 0.10 (5.67)          |
| 17 | Javadi L, 2017 (2)   | Adults, NAFLD   | Synbiotics   | 17          | -4.21 (5.54)         | -0.50 (0.57)         |
|    |                      |                 | Probiotics   | 20          | -2.78 (7.90)         | -0.25 (0.47)         |
|    |                      |                 | Prebiotics   | 19          | -1.64 (9.29)         | -0.30 (0.43)         |
|    |                      |                 | Placebo      | 19          | 0.53 (8.19)          | 0.00 (0.35)          |
| 18 | Manzhalii E, 2017    |                 | Synbiotics   | 38          | -1.00 (10.80)        | -                    |

| ID | Author                      | Year             | Intervention | Sample size | FBS (mg/dL)          | HOMA-IR              |
|----|-----------------------------|------------------|--------------|-------------|----------------------|----------------------|
|    |                             |                  |              |             | Mean difference (SD) | Mean difference (SD) |
|    |                             | Adults,<br>NASH  | Placebo      | 37          | 1.30 (11.10)         | -                    |
| 19 | Mofidi F, 2017              | Adults,<br>NAFLD | Synbiotics   | 21          | -17.33 (22.82)       | -0.10 (1.01)         |
|    |                             |                  | Placebo      | 21          | -2.47 (2.38)         | -1.32 (0.14)         |
| 21 | Bakhshimoghaddam F,<br>2018 | Adults,<br>NAFLD | Synbiotics   | 34          | -                    | -1.30 (1.69)         |
|    |                             |                  | Placebo      | 34          | -                    | 0.20 (1.58)          |
| 22 | Ahn SB, 2019                | Adults,<br>NAFLD | Probiotics   | 30          | -13.30 (72.59)       | -24.6 (36.3)         |
|    |                             |                  | Placebo      | 35          | 0.10 (72.28)         | 3.2 (32.46)          |
| 24 | Abhari K, 2020              | Adults,<br>NAFLD | Synbiotics   | 22          | -4.42 (18.26)        | -0.58 (1.68)         |
|    |                             |                  | Placebo      | 24          | -3.37 (6.92)         | -0.25 (0.38)         |
| 25 | Behrouz V, 2020             | Adults,<br>NAFLD | Probiotics   | 30          | -2.08 (10.02)        | -                    |
|    |                             |                  | Prebiotics   | 29          | -7.83 (13.41)        | -                    |
|    |                             |                  | Placebo      | 30          | -3.17 (13.39)        | -                    |
| 26 | Chong PL, 2021              | Adults,<br>NAFLD | Probiotics   | 19          | -                    | 0.00 (1.73)          |
|    |                             |                  | Placebo      | 16          | -                    | -0.10 (1.64)         |

FBS: fasting blood sugar; HOMA-IR: homeostatic model assessment-insulin resistance; mg/dL, milligram per deciliter; NAFLD: non-alcoholic fatty liver disease; NASH: non-alcoholic steatohepatitis; SD: standard deviation

## Appendix 9: Result of network meta-analysis

**Table S9** Network-estimated, weighted mean difference of options for reduction in AST (IU/L)

|                                      |                                      |                                     |         |
|--------------------------------------|--------------------------------------|-------------------------------------|---------|
| Synbiotics                           |                                      |                                     |         |
| -1.09 (-7.80, 5.61)                  | Probiotics                           |                                     |         |
| -4.29 (-12.83, 4.24)                 | -3.20 (-11.53, 5.13)                 | Prebiotics                          |         |
| <b><u>-12.71 (-16.95, -8.47)</u></b> | <b><u>-11.62 (-17.15, -6.09)</u></b> | <b><u>-8.42 (-16.27, -0.56)</u></b> | Placebo |

**Table S10** Network-estimated, weighted mean difference of options for reduction in ALT (IU/L)

|                                      |                                      |                                      |         |
|--------------------------------------|--------------------------------------|--------------------------------------|---------|
| Probiotics                           |                                      |                                      |         |
| -0.80 (-10.22, 8.61)                 | Prebiotics                           |                                      |         |
| -0.80 (-10.22, 8.61)                 | -1.05 (-10.72, 8.62)                 | Synbiotics                           |         |
| <b><u>-14.46 (-21.33, -7.59)</u></b> | <b><u>-13.65 (-22.69, -4.61)</u></b> | <b><u>-12.60 (-17.22, -7.98)</u></b> | Placebo |

**Table S11** Network-estimated, weighted mean difference of options for reduction in BMI (kg/m<sup>2</sup>)

|                     |                     |                     |         |
|---------------------|---------------------|---------------------|---------|
| Synbiotics          |                     |                     |         |
| -0.35 (-1.86, 1.16) | Prebiotics          |                     |         |
| -0.46 (-1.88, 0.96) | -0.11 (-1.58, 1.36) | Probiotics          |         |
| -0.71 (-1.49, 0.08) | -0.36 (-1.69, 0.97) | -0.25 (-1.47, 0.97) | Placebo |

**Table S12** Network-estimated, weighted mean difference of options for reduction in WC (cm)

|                                    |                     |                     |         |
|------------------------------------|---------------------|---------------------|---------|
| Synbiotics                         |                     |                     |         |
| -1.47 (-3.41, 0.47)                | Prebiotics          |                     |         |
| <b><u>-1.98 (-3.84, -0.11)</u></b> | -0.51 (-2.82, 1.80) | Probiotics          |         |
| <b><u>-2.26 (-2.98, -1.54)</u></b> | -0.79 (-2.60, 1.03) | -0.28 (-2.01, 1.45) | Placebo |

**Table S13** Network-estimated, weighted mean difference of options for reduction in TC (mg/dL)

|                                       |                                      |                       |         |
|---------------------------------------|--------------------------------------|-----------------------|---------|
| Synbiotics                            |                                      |                       |         |
| -5.80 (-22.12, 10.51)                 | Prebiotics                           |                       |         |
| -12.03 (-24.68, 0.62)                 | -6.22 (-22.17, 9.72)                 | Probiotics            |         |
| <b><u>-22.23 (-29.55, -14.90)</u></b> | <b><u>-16.42 (-31.57, -1.27)</u></b> | -10.20 (-20.96, 0.56) | Placebo |

**Table S14** Network-estimated, weighted mean difference of options for reduction in TG (mg/dL)

|                                      |                       |                                      |         |
|--------------------------------------|-----------------------|--------------------------------------|---------|
| Probiotics                           |                       |                                      |         |
| -2.61 (-27.88, 22.65)                | Prebiotics            |                                      |         |
| -8.21 (-28.78, 12.37)                | -5.59 (-33.44, 22.25) | Synbiotics                           |         |
| <b><u>-20.97 (-40.42, -1.53)</u></b> | -18.36 (-45.50, 8.78) | <b><u>-12.77 (-20.88, -4.66)</u></b> | Placebo |

**Table S15** Network-estimated, weighted mean difference of options for reduction in LDL (mg/dL)

|                                       |                                      |                       |         |
|---------------------------------------|--------------------------------------|-----------------------|---------|
| Synbiotics                            |                                      |                       |         |
| -1.85 (-16.45, 12.75)                 | Prebiotics                           |                       |         |
| -7.56 (-19.88, 4.75)                  | -5.72 (-20.09, 8.65)                 | Probiotics            |         |
| <b><u>-17.72 (-25.23, -10.22)</u></b> | <b><u>-15.88 (-29.34, -2.42)</u></b> | -10.16 (-20.62, 0.29) | Placebo |

**Table S16** Network-estimated, weighted mean difference of options for increasing HDL (mg/dL)

|                    |                    |                    |            |
|--------------------|--------------------|--------------------|------------|
| Placebo            |                    |                    |            |
| 0.15 (-3.26, 3.56) | Synbiotics         |                    |            |
| 0.75 (-3.18, 4.68) | 0.60 (-4.34, 5.54) | Probiotics         |            |
| 1.75 (-3.91, 7.41) | 1.60 (-4.68, 7.88) | 1.00 (-4.77, 6.77) | Prebiotics |

**Table S17** Network-estimated, weighted mean difference of options for reduction in FBS (mg/dL)

|                                     |                      |                     |         |
|-------------------------------------|----------------------|---------------------|---------|
| Synbiotics                          |                      |                     |         |
| -1.94 (-8.67, 4.79)                 | Prebiotics           |                     |         |
| -3.80 (-9.61, 2.01)                 | -1.86 (-7.93, 4.21)  | Probiotics          |         |
| <b><u>-6.75 (-10.67, -2.84)</u></b> | -4.81 (-10.90, 1.27) | -2.96 (-7.84, 1.92) | Placebo |

**Table S18** Network-estimated, weighted mean difference of options for reduction in HOMA-IR

|                     |                     |                     |         |
|---------------------|---------------------|---------------------|---------|
| Prebiotics          |                     |                     |         |
| -0.03 (-1.14, 1.09) | Probiotics          |                     |         |
| -0.06 (-1.24, 1.11) | -0.03 (-0.97, 0.91) | Synbiotics          |         |
| -0.52 (-1.64, 0.59) | -0.50 (-1.31, 0.32) | -0.46 (-1.06, 0.14) | Placebo |

**Appendix 10: Surface under the cumulative ranking curves**

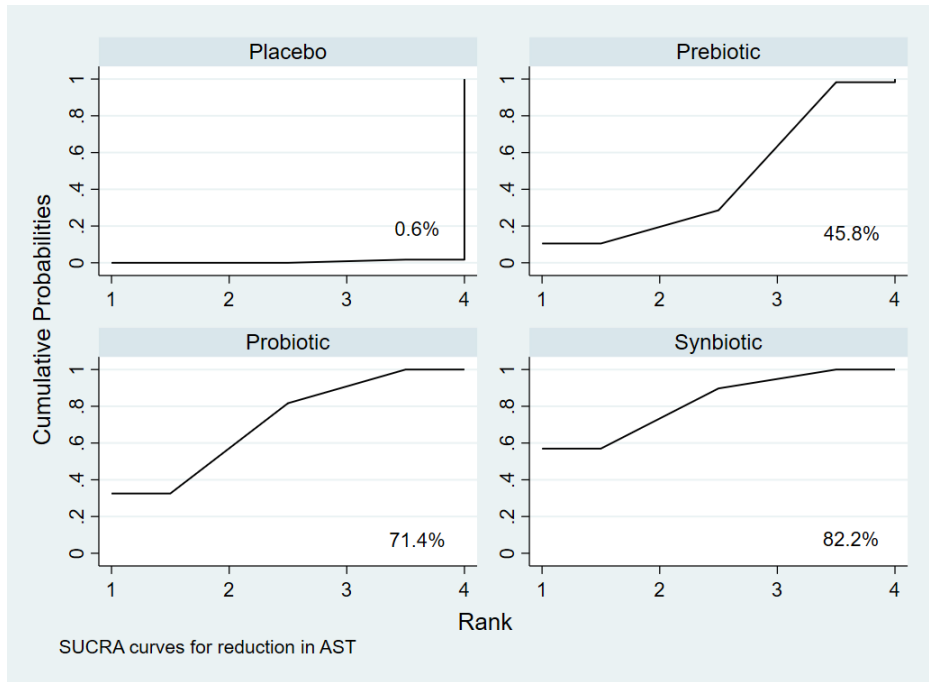

**Figure S11** SUCRA curves for reduction in aspartate transaminase

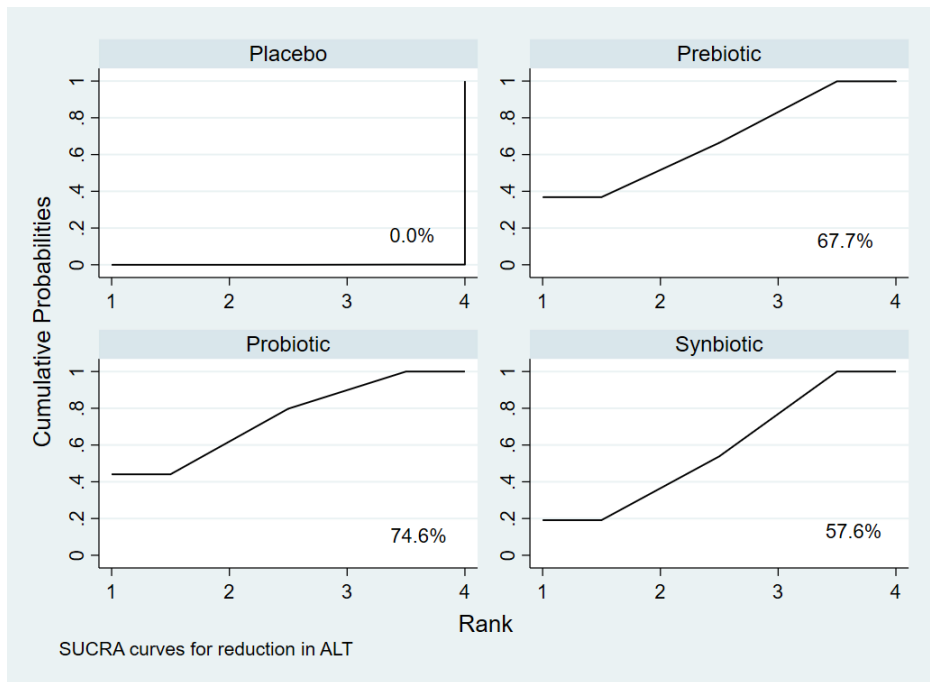

**Figure S12** SUCRA curves for reduction in alanine transaminase



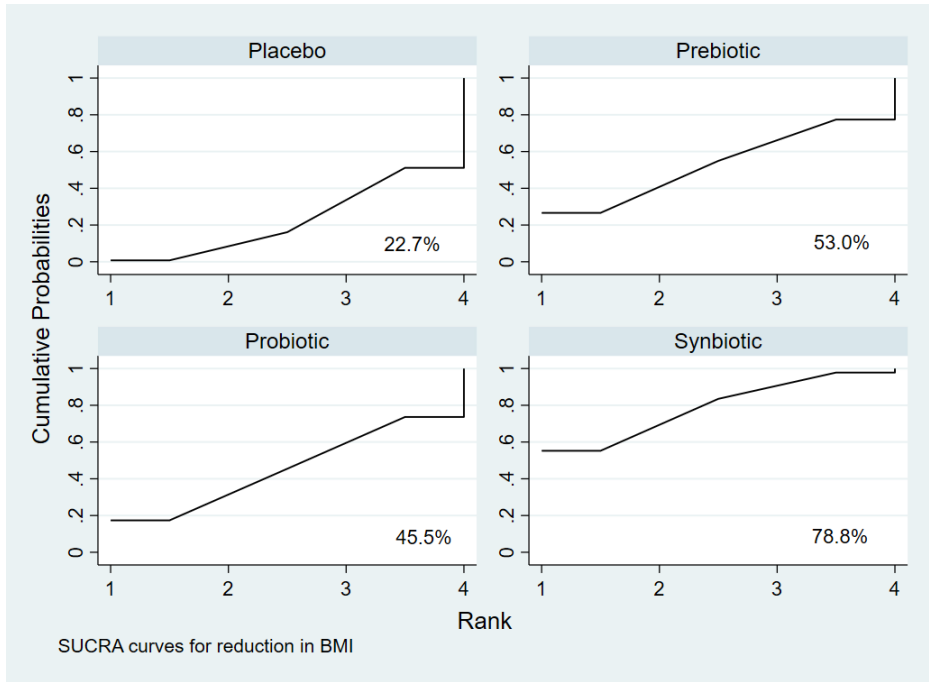

**Figure S13** SUCRA curves for reduction in body mass index

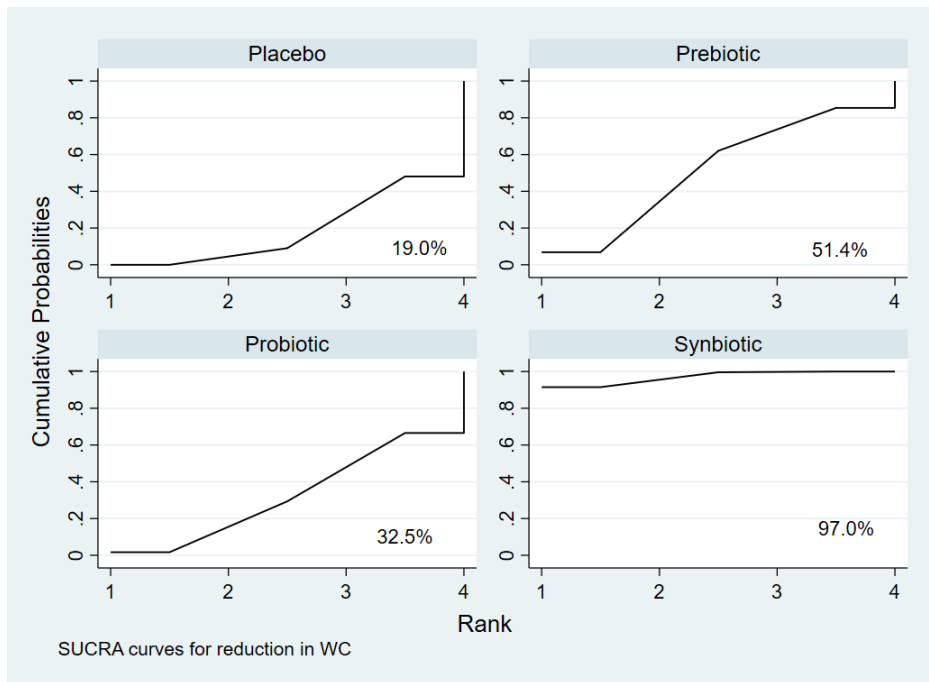

**Figure S14** SUCRA curves for reduction in waist circumference

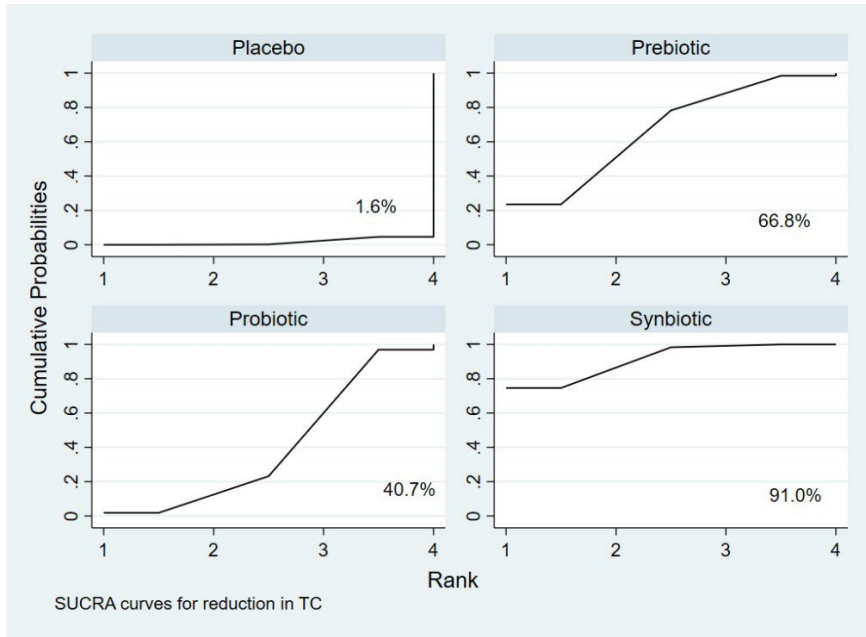

**Figure S15** SUCRA curves for reduction in total cholesterol

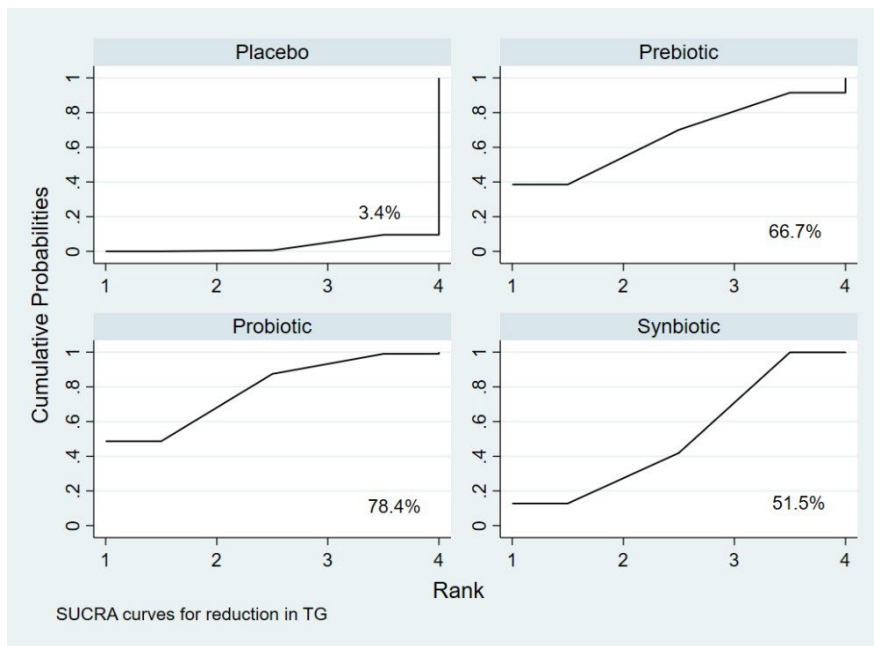

**Figure S16** SUCRA curves for reduction in triglycerides

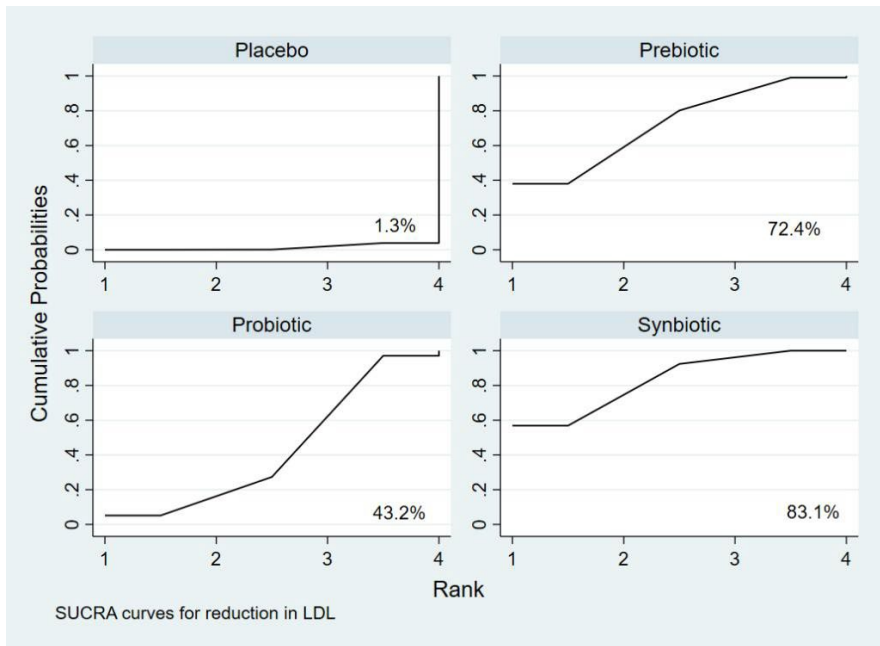

**Figure S17** SUCRA curves for reduction in low-density lipoproteins

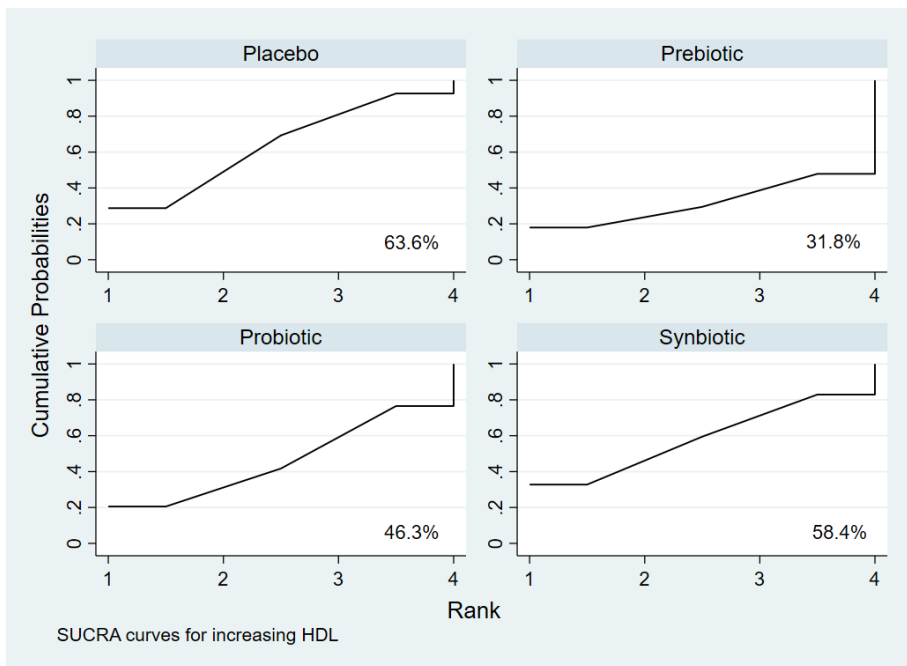

**Figure S18** SUCRA curves for increasing high-density lipoproteins

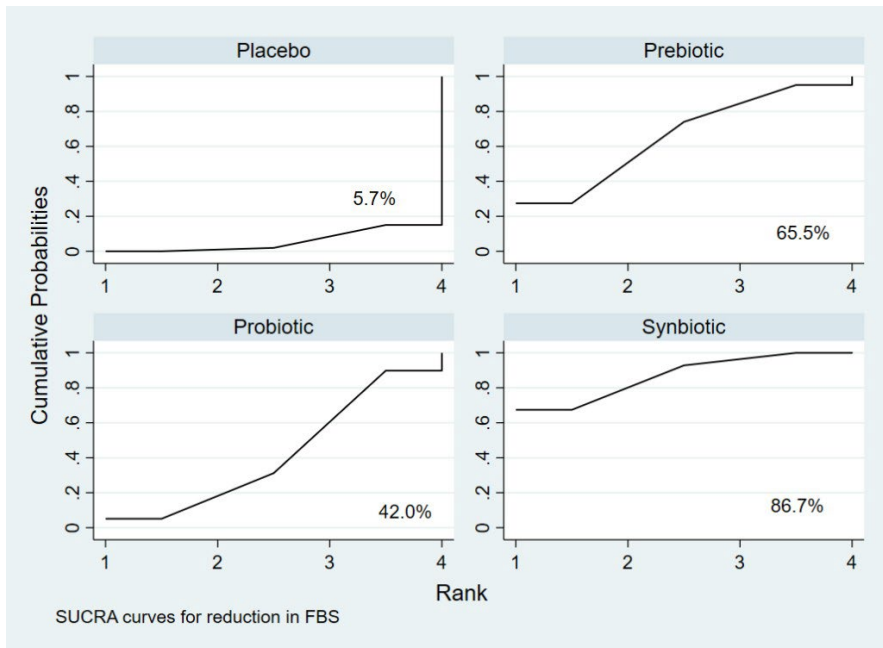

**Figure S19** SUCRA curves for reduction in fasting blood sugar

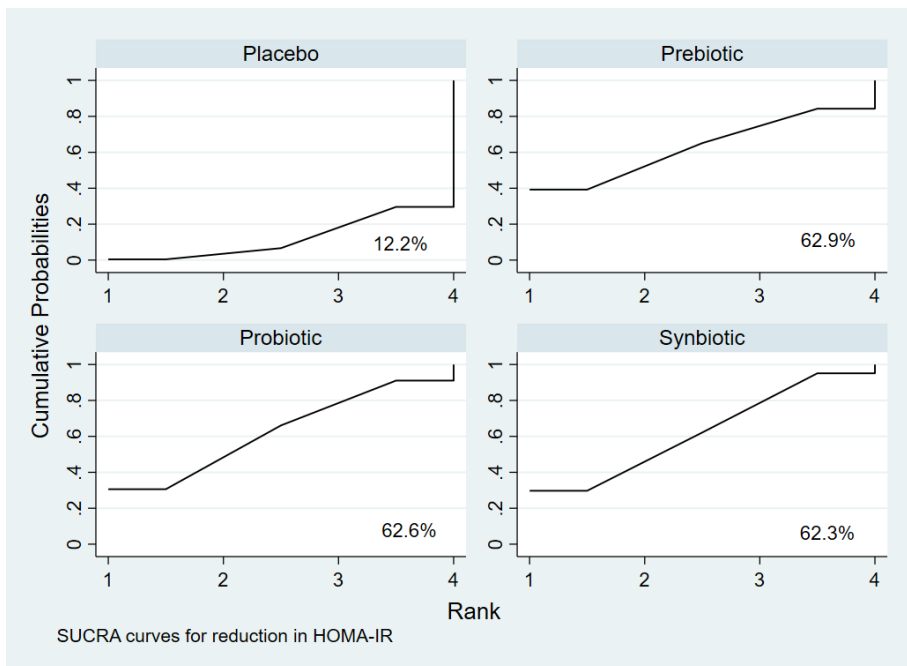

**Figure S20** SUCRA curves for reduction in HOMA-IR

## Appendix 11: Assessment of inconsistency

**Table S19** Assessment of global inconsistency in network meta-analysis

| <b>Network outcome</b> | <b><i>p</i>-value for test of global inconsistency</b> |
|------------------------|--------------------------------------------------------|
| Decreasing AST         | 0.9369                                                 |
| Decreasing ALT         | 0.2703                                                 |
| Decreasing BMI         | 0.9990                                                 |
| Decreasing WC          | 0.3383                                                 |
| Decreasing TC          | 0.5528                                                 |
| Decreasing TG          | 0.7671                                                 |
| Decreasing LDL         | 0.7586                                                 |
| Increasing HDL         | 0.6329                                                 |
| Decreasing FBS         | 0.8826                                                 |
| Decreasing HOMA-IR     | 0.9837                                                 |

ALT: alanine aminotransferase; AST: aspartate aminotransferase; BMI: body mass index; FBS: fasting blood sugar; HDL: high-density lipoproteins; HOMA-IR: homeostatic model assessment-insulin resistance; LDL: low-density lipoproteins; TC: total cholesterol; TG: triglycerides; WC: waist circumference

## Appendix 12: Comparison-adjusted funnel plots

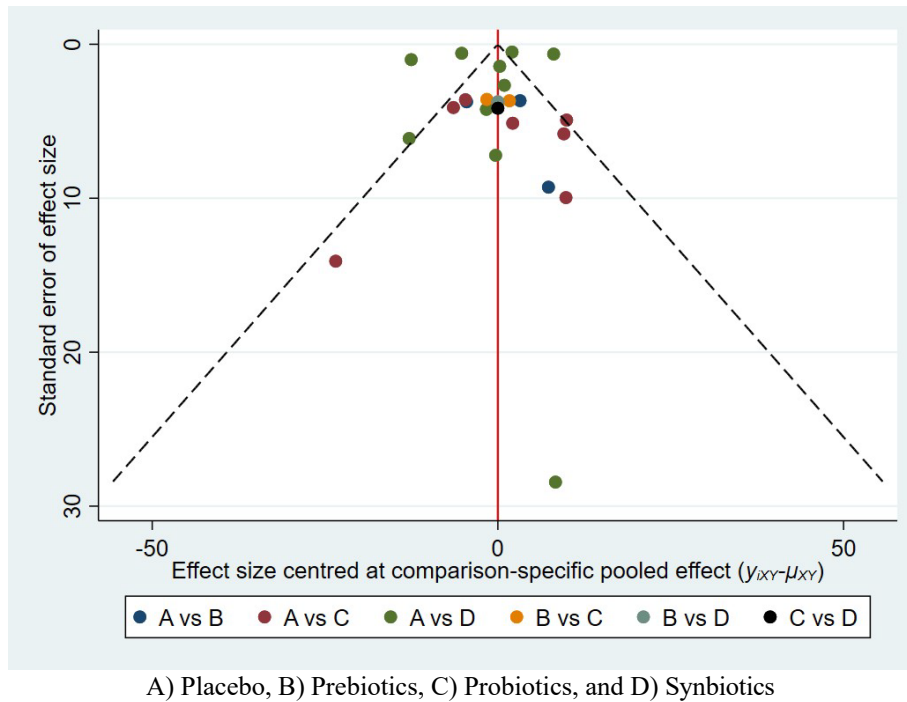

**Figure S21** Comparison-adjusted funnel plot for the network of reduction in AST in all comparisons

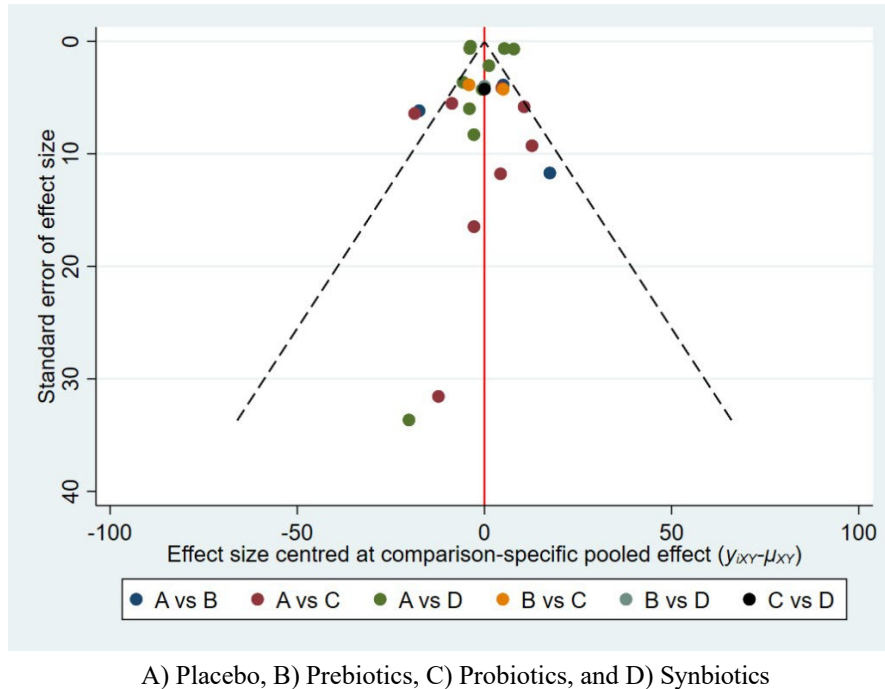

**Figure S22** Comparison-adjusted funnel plot for the network of reduction in ALT in all comparisons

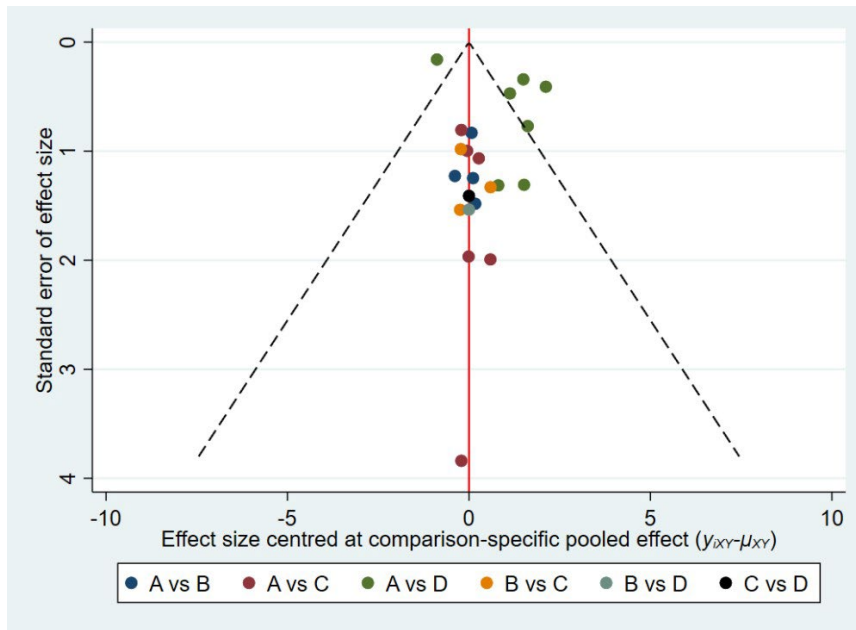

A) Placebo, B) Prebiotics, C) Probiotics, and D) Synbiotics

**Figure S23** Comparison-adjusted funnel plot for the network of reduction in BMI in all comparisons

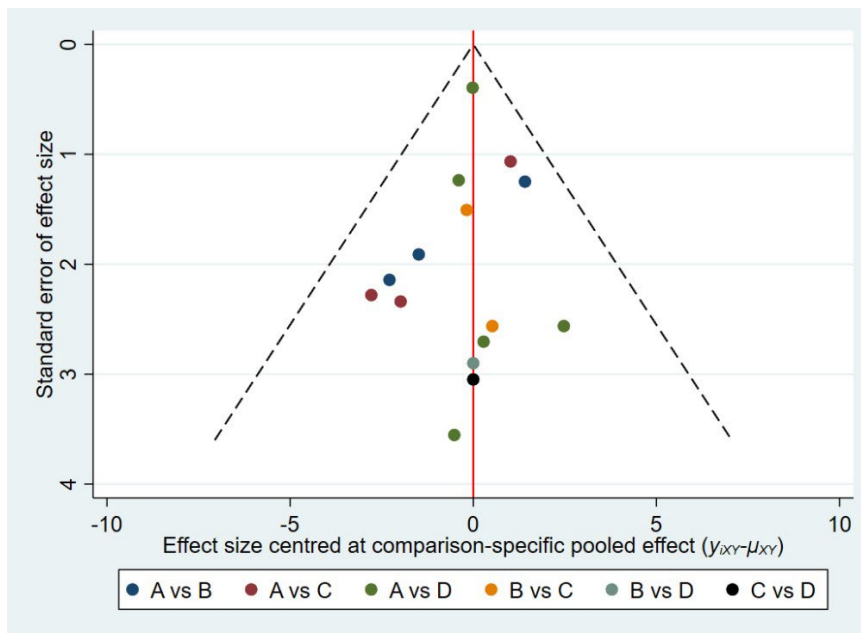

A) Placebo, B) Prebiotics, C) Probiotics, and D) Synbiotics

**Figure S24** Comparison-adjusted funnel plot for the network of reduction in WC in all comparisons

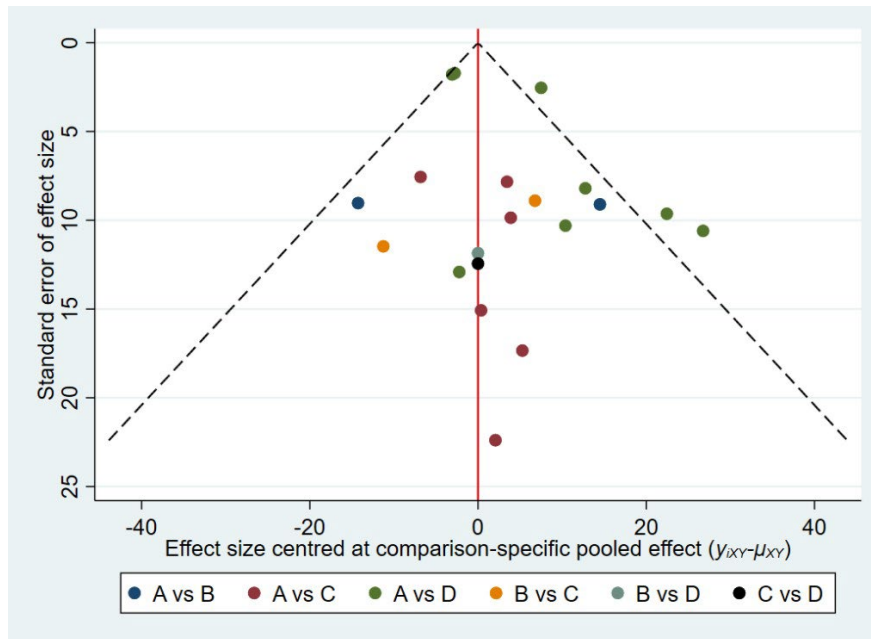

A) Placebo, B) Prebiotics, C) Probiotics, and D) Synbiotics

**Figure S25** Comparison-adjusted funnel plot for the network of reduction in TC in all comparisons

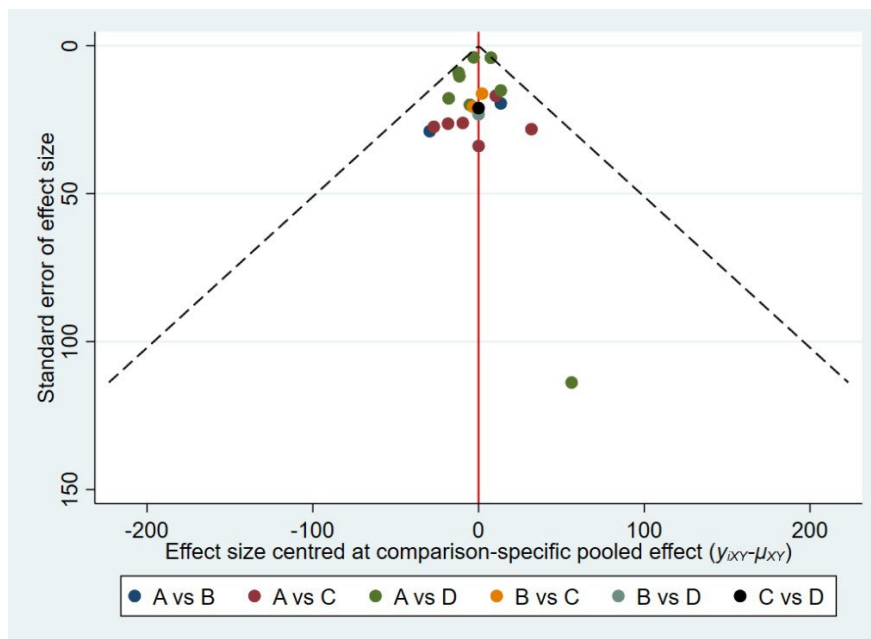

A) Placebo, B) Prebiotics, C) Probiotics, and D) Synbiotics

**Figure S26** Comparison-adjusted funnel plot for the network of reduction in TG in all comparisons



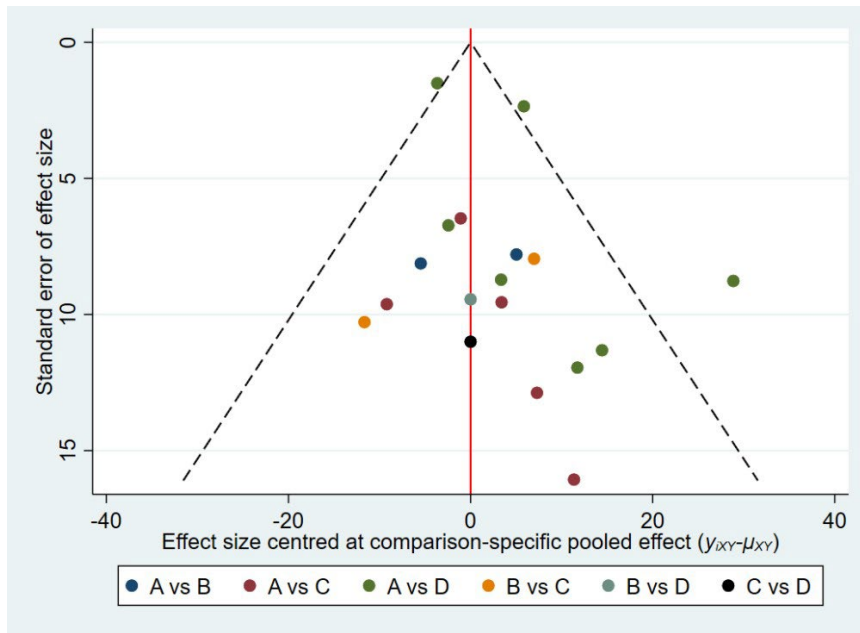

A) Placebo, B) Prebiotics, C) Probiotics, and D) Synbiotics

**Figure S27** Comparison-adjusted funnel plot for the network of reduction in LDL in all comparisons

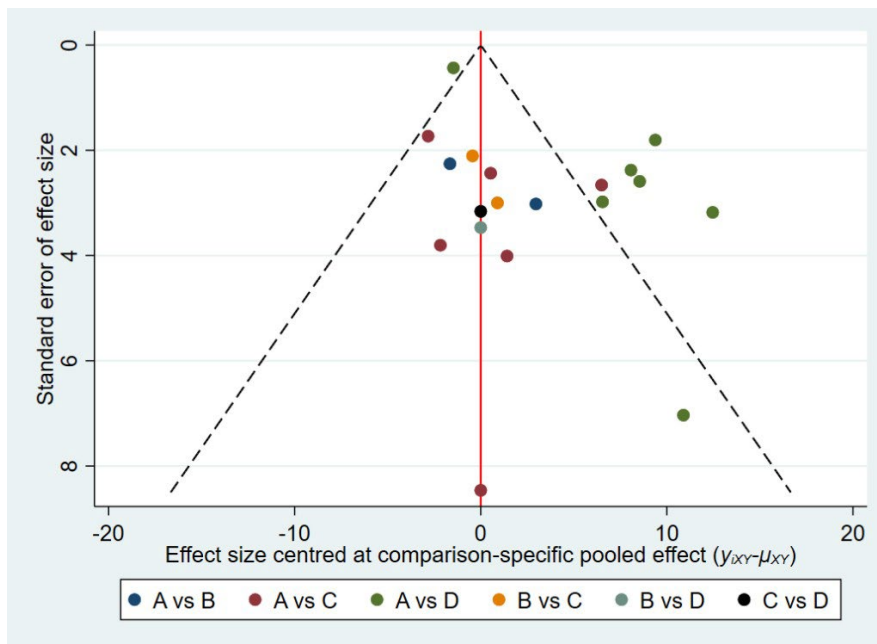

A) Placebo, B) Prebiotics, C) Probiotics, and D) Synbiotics

**Figure S28** Comparison-adjusted funnel plot for the network of increasing HDL in all comparisons

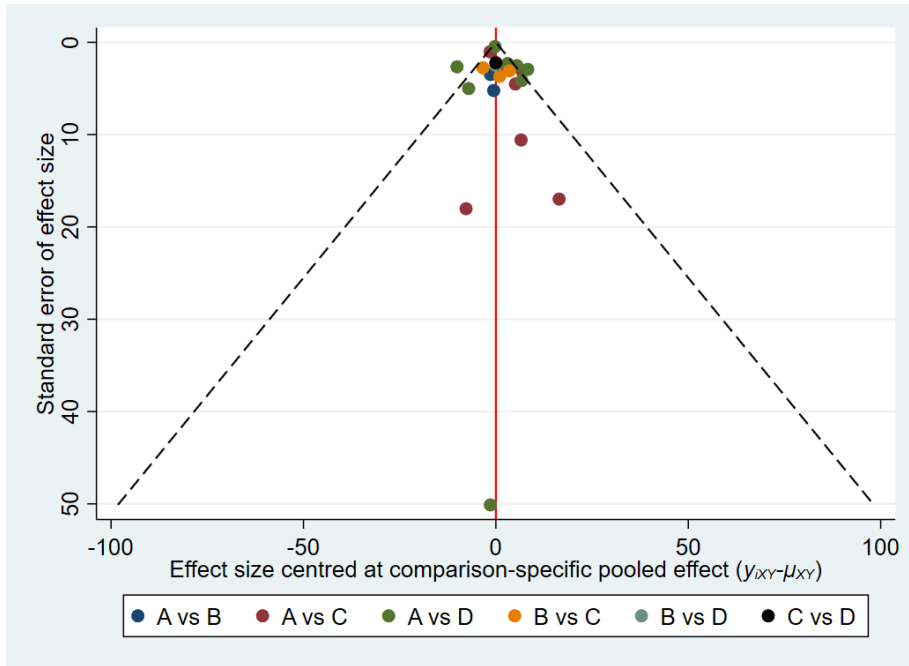

A) Placebo, B) Prebiotics, C) Probiotics, and D) Synbiotics

**Figure S29** Comparison-adjusted funnel plot for the network of reduction in FBS in all comparisons

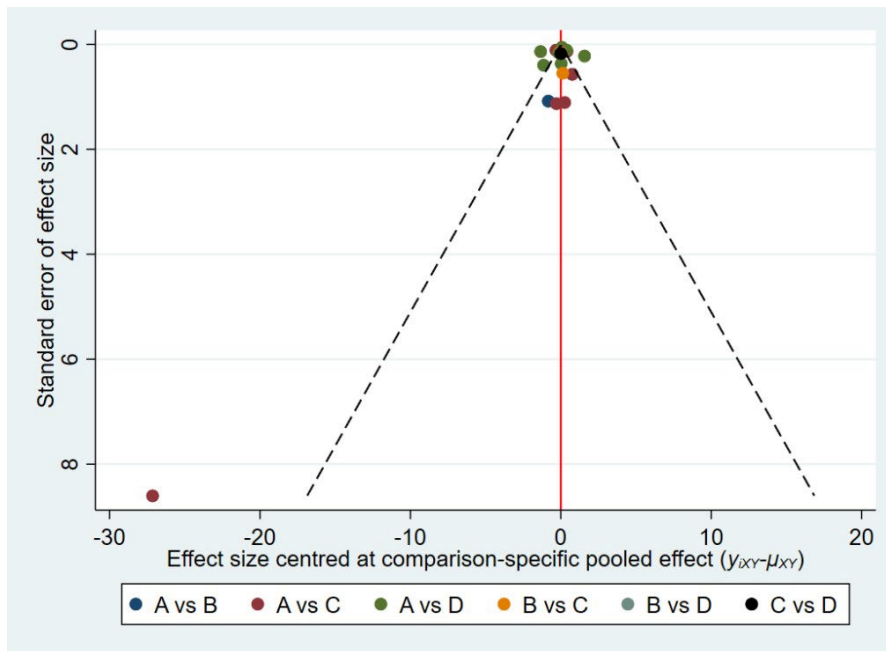

A) Placebo, B) Prebiotics, C) Probiotics, and D) Synbiotics

**Figure S30** Comparison-adjusted funnel plot for the network of reduction in HOMA-IR in all comparisons

### Appendix 13: Sensitivity analyses of AST outcomes

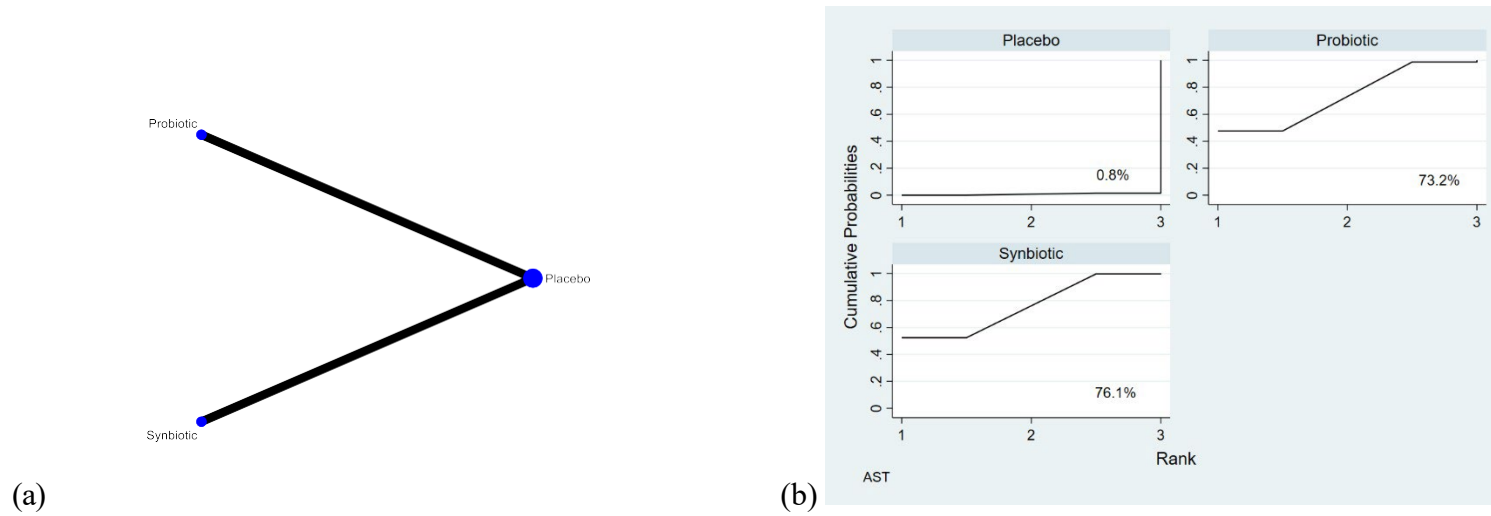

**Figure S31** Sensitivity analysis of the reduction in AST among biopsy-proven NASH patients. (a) network graph and (b) SUCRA curves

**Table S20** Network-estimated, weighted mean difference of options for reduction in AST among biopsy-proven NASH patients.

|                                      |                                      |         |
|--------------------------------------|--------------------------------------|---------|
| Synbiotics                           |                                      |         |
| -0.94 (-28.86,26.97)                 | Probiotics                           |         |
| <b><u>-22.34 (-38.02, -6.67)</u></b> | <b><u>-21.40 (-39.86, -2.94)</u></b> | Placebo |

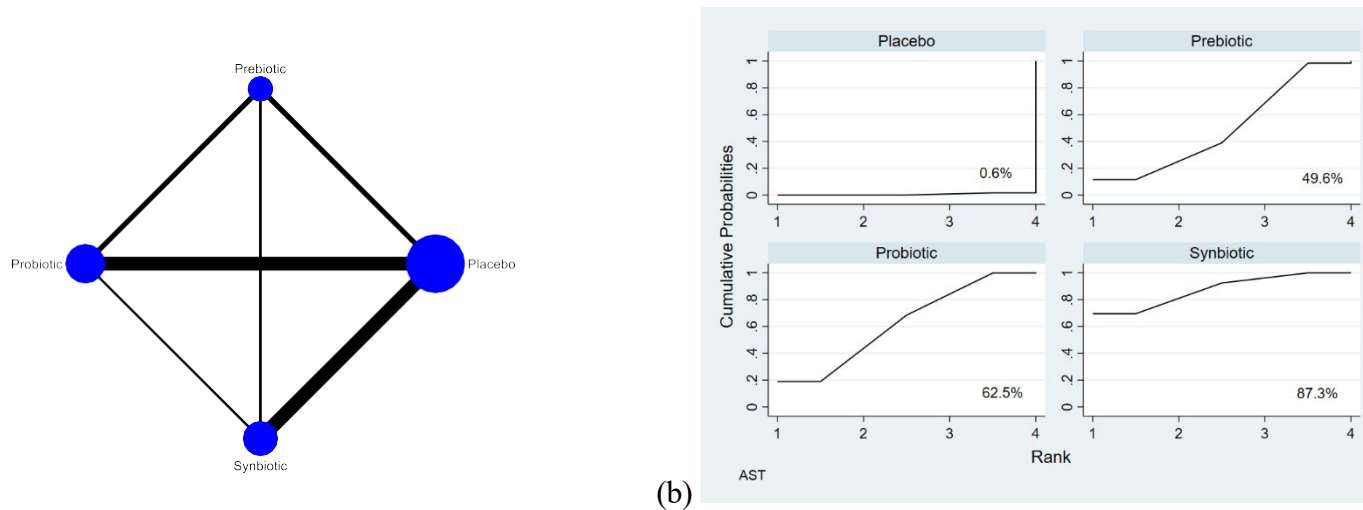

**Figure S32** Sensitivity analysis of the reduction in AST duration of treatment not less than 12 weeks among NAFLD patients. (a) network graph and (b) SUCRA curves

**Table S21** Network-estimated, weighted mean difference of options for reduction in AST duration of treatment not less than 12 weeks among NAFLD patients.

|                                      |                                      |                                     |         |
|--------------------------------------|--------------------------------------|-------------------------------------|---------|
| Synbiotics                           |                                      |                                     |         |
| -2.95 (-10.75, 4.85)                 | Probiotics                           |                                     |         |
| -4.69 (-13.74, 4.36)                 | -1.73 (-10.25, 6.78)                 | Prebiotics                          |         |
| <b><u>-13.61 (-18.97, -8.24)</u></b> | <b><u>-10.65 (-17.09, -4.22)</u></b> | <b><u>-8.92 (-17.11, -0.72)</u></b> | Placebo |

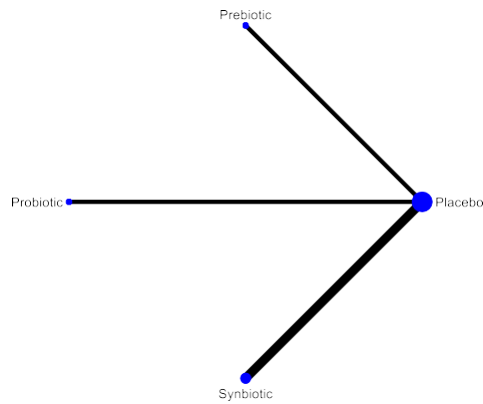

(a)

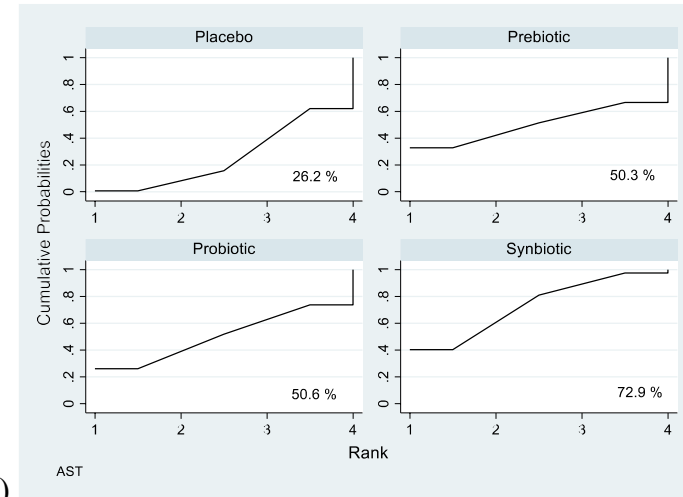

(b)

**Figure S33** Sensitivity analysis of the reduction in AST duration of treatment less than 12 weeks among NAFLD patients. (a) network graph and (b) SUCRA curves

**Table S22** Network-estimated, weighted mean difference of options for reduction in AST duration of treatment less than 12 weeks among NAFLD patients.

|                       |                       |                       |         |
|-----------------------|-----------------------|-----------------------|---------|
| Synbiotics            |                       |                       |         |
| -2.89 (-19.11, 13.32) | Probiotics            |                       |         |
| -2.89 (-24.43, 18.64) | 0.00 (-25.05, 25.05)  | Prebiotics            |         |
| -5.89 (-12.94, 1.15)  | -3.00 (-17.60, 11.60) | -3.00 (-23.35, 17.35) | Placebo |

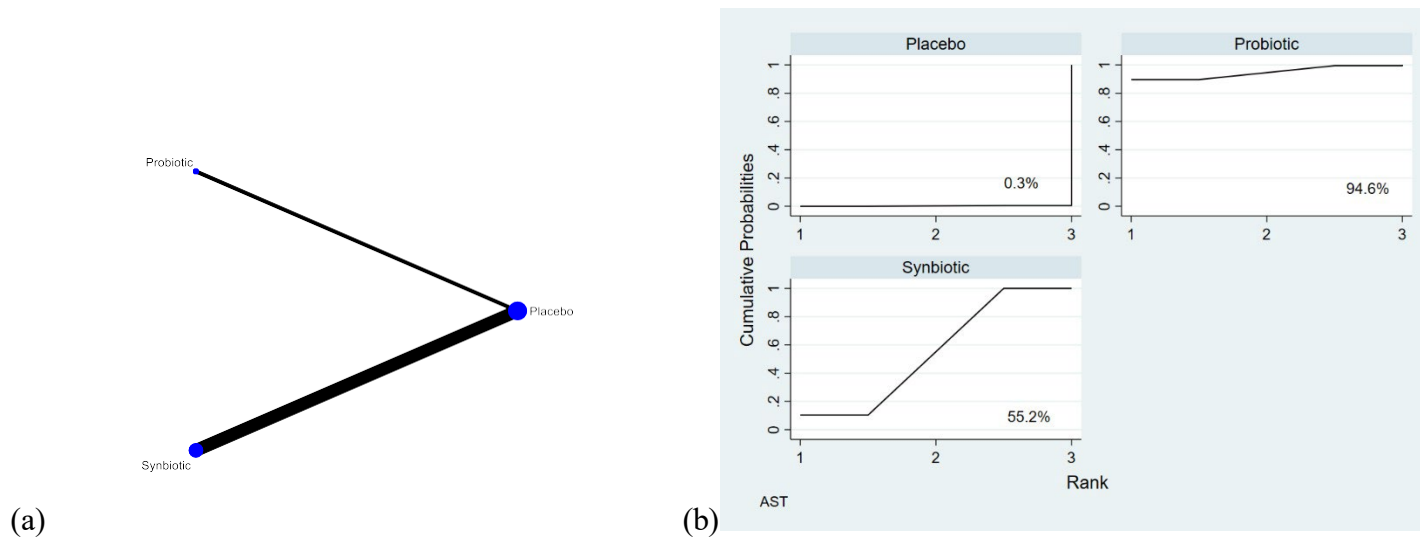

**Figure S34** Sensitivity analysis of the reduction in AST duration of treatment not less than 12 weeks among NASH patients. (a) network graph and (b) SUCRA curves

**Table S23** Network-estimated, weighted mean difference of options for reduction in AST duration of treatment not less than 12 weeks among NASH patients.

|                                      |                                      |         |
|--------------------------------------|--------------------------------------|---------|
| Probiotics                           |                                      |         |
| -18.99 (-48.17, 10.20)               | Synbiotics                           |         |
| <b><u>-36.00 (-64.06, -7.94)</u></b> | <b><u>-17.01 (-25.03, -8.99)</u></b> | Placebo |

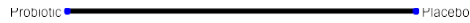

(a)

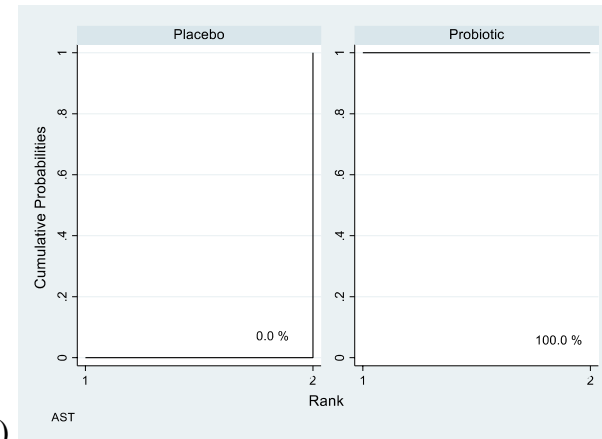

(b)

**Figure S35** Sensitivity analysis of the reduction in AST duration of treatment less than 12 weeks among NASH patients. (a) network graph and (b) SUCRA curves

**Table S24** Network-estimated, weighted mean difference of options for reduction in AST duration of treatment less than 12 weeks among NASH patients.

|                         |         |
|-------------------------|---------|
| Probiotics              |         |
| -18.98 (-25.37, -12.59) | Placebo |

### Appendix 14: Sensitivity analyses of ALT outcomes

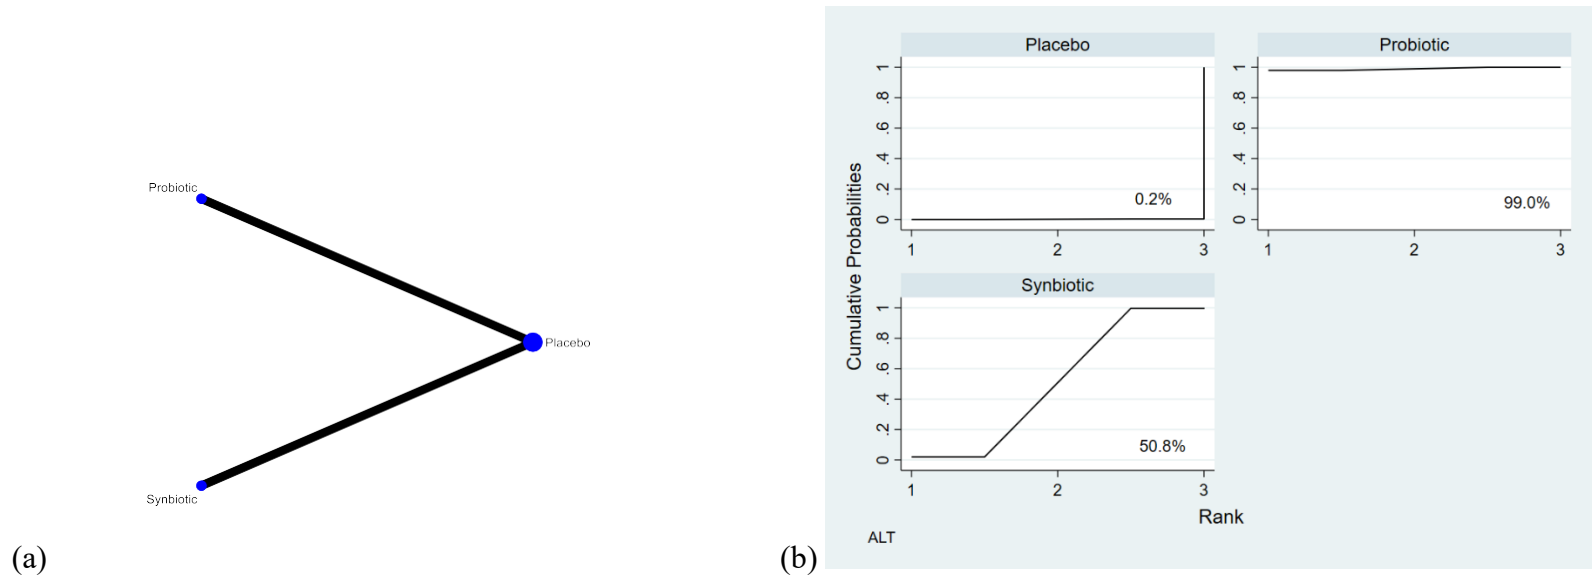

**Figure S36** Sensitivity analysis of the reduction in ALT among biopsy-proven NASH patients. (a) network graph and (b) SUCRA curves

**Table S25** Network-estimated, weighted mean difference of options for reduction in ALT among biopsy-proven NASH patients.

|                                       |                                      |         |
|---------------------------------------|--------------------------------------|---------|
| Probiotics                            |                                      |         |
| <b><u>-17.70 (-34.61, -0.79)</u></b>  | Synbiotics                           |         |
| <b><u>-34.10 (-46.43, -21.77)</u></b> | <b><u>-16.40 (-27.96, -4.83)</u></b> | Placebo |



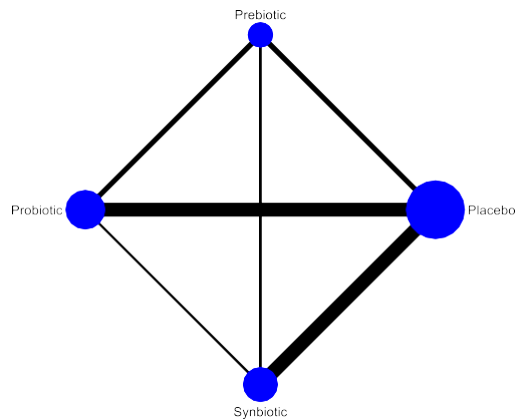

(a)

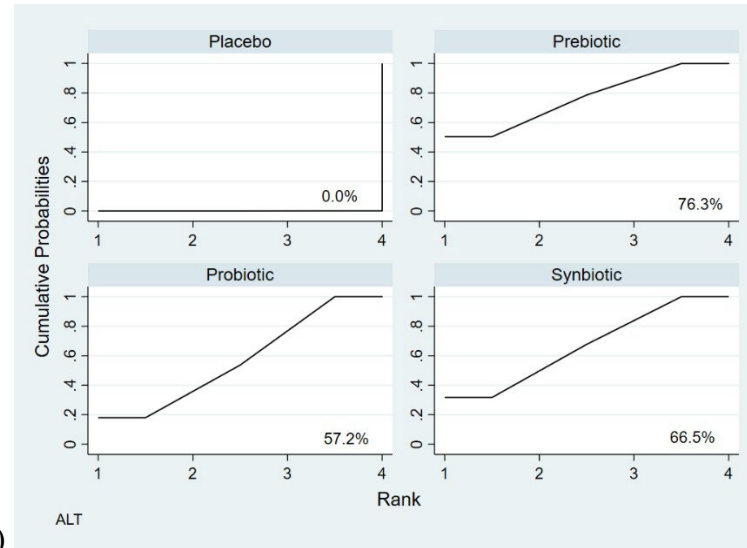

(b)

**Figure S37** Sensitivity analysis of the reduction in ALT duration of treatment not less than 12 weeks among NAFLD patients. (a) network graph and (b) SUCRA curves

**Table S26** Network-estimated, weighted mean difference of options for reduction in ALT duration of treatment not less than 12 weeks among NAFLD patients.

|                               |                               |                               |         |
|-------------------------------|-------------------------------|-------------------------------|---------|
| Prebiotics                    |                               |                               |         |
| -1.30 (-11.09, 8.49)          | Synbiotics                    |                               |         |
| -2.27 (-11.39, 6.86)          | -0.97 (-9.57, 7.63)           | Probiotics                    |         |
| <b>-14.85 (-24.06, -5.64)</b> | <b>-13.55 (-19.20, -7.90)</b> | <b>-12.58 (-20.11, -5.06)</b> | Placebo |

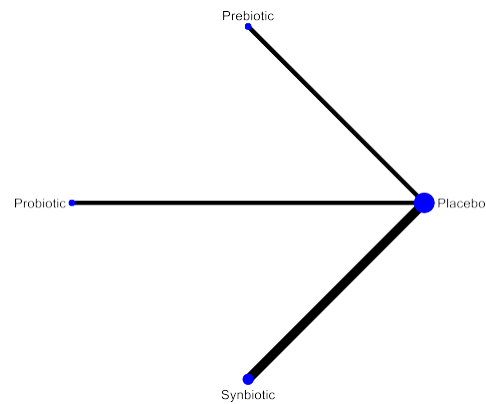

(a)

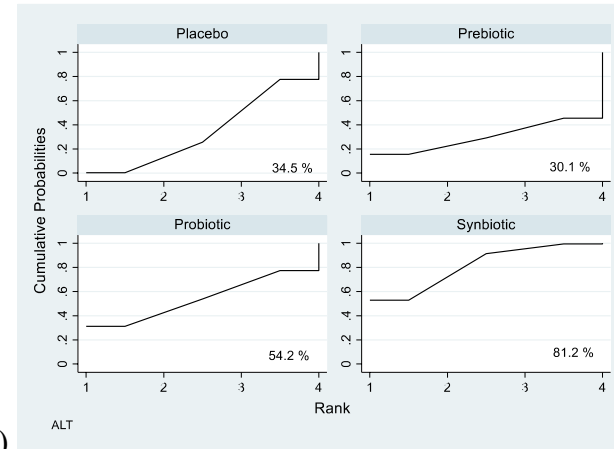

(b)

**Figure S38** Sensitivity analysis of the reduction in ALT duration of treatment less than 12 weeks among NAFLD patients. (a) network graph and (b) SUCRA curves

**Table S27** Network-estimated, weighted mean difference of options for reduction in ALT duration of treatment less than 12 weeks among NAFLD patients.

|                                     |                       |                       |            |
|-------------------------------------|-----------------------|-----------------------|------------|
| Synbiotics                          |                       |                       |            |
| -4.05 (-25.25, 17.14)               | Probiotics            |                       |            |
| <b><u>-7.05 (-13.61, -0.50)</u></b> | -3.00 (-23.16, 17.16) | Placebo               |            |
| -11.25 (-36.64, 14.14)              | -7.20 (-38.95, 24.55) | -4.20 (-28.73, 20.33) | Prebiotics |

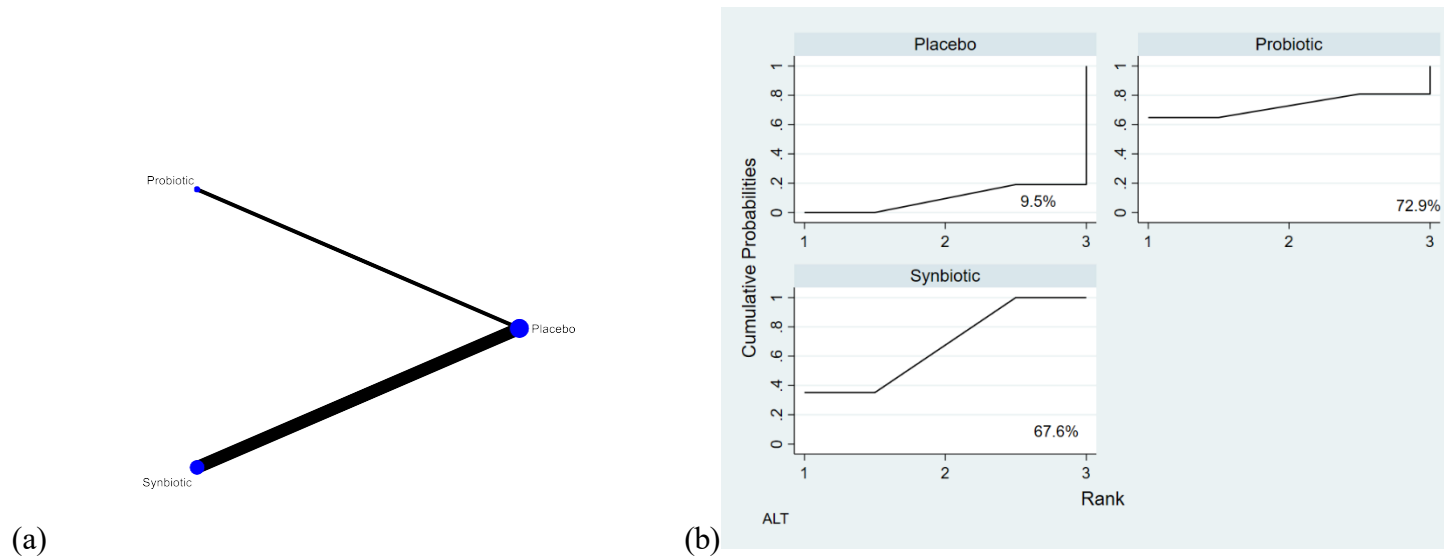

**Figure S39** Sensitivity analysis of the reduction in ALT duration of treatment not less than 12 weeks among NASH patients. (a) network graph and (b) SUCRA curves

**Table S28** Network-estimated, weighted mean difference of options for reduction in ALT duration of treatment not less than 12 weeks among NASH patients.

|                        |                                       |         |
|------------------------|---------------------------------------|---------|
| Probiotics             |                                       |         |
| -12.19 (-74.07, 49.68) | Synbiotics                            |         |
| -28.00 (-89.86, 33.86) | <b><u>-15.81 (-17.06, -14.55)</u></b> | Placebo |

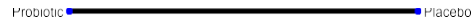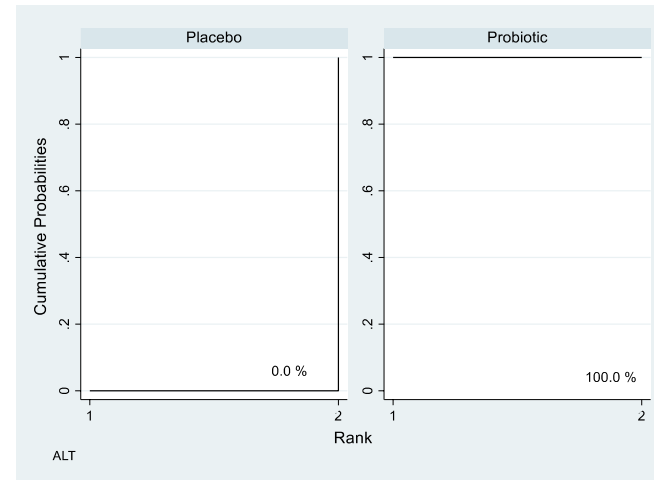

(b)

**Figure S40** Sensitivity analysis of the reduction in ALT duration of treatment less than 12 weeks among NASH patients. (a) network graph and (b) SUCRA curves

**Table S29** Network-estimated, weighted mean difference of options for reduction in ALT duration of treatment less than 12 weeks among NASH patients.

|                         |         |
|-------------------------|---------|
| Probiotics              |         |
| -34.35 (-45.91, -22.78) | Placebo |

### Appendix 15: Sensitivity analyses of BMI outcomes

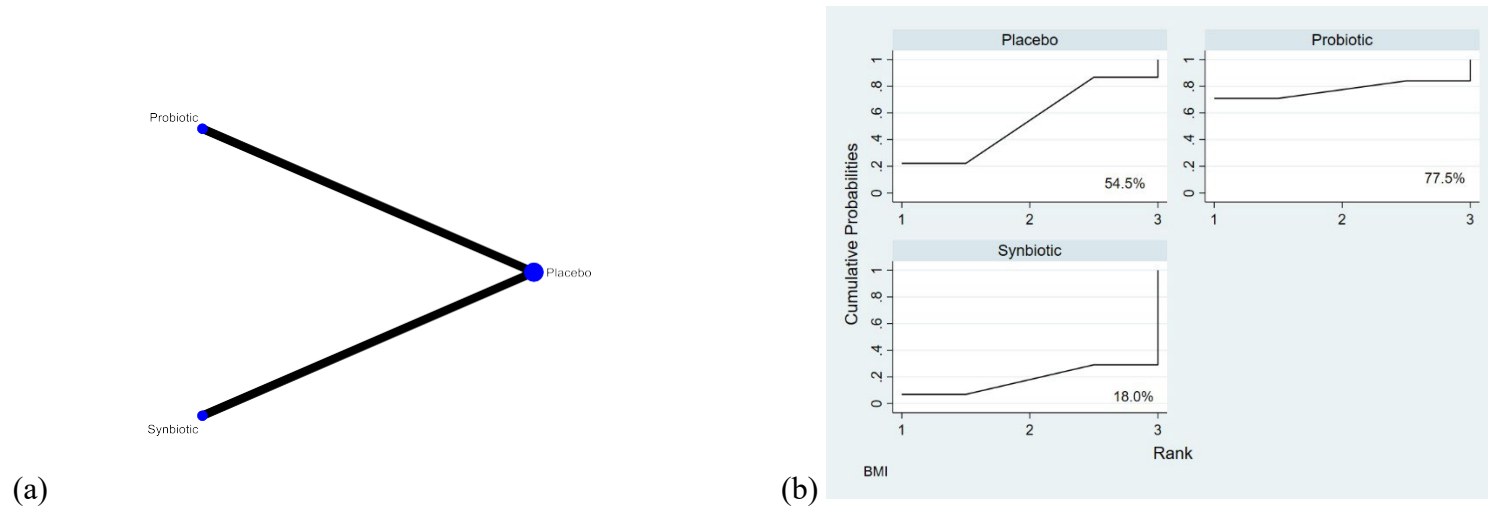

**Figure S41** Sensitivity analysis of the reduction in BMI among biopsy-proven NASH patients. (a) network graph and (b) SUCRA curves

**Table S30** Network-estimated, weighted mean difference of options for reduction in BMI among biopsy-proven NASH patients.

|                     |                    |         |
|---------------------|--------------------|---------|
| Probiotics          |                    |         |
| -0.85 (-2.60, 0.91) | Synbiotics         |         |
| -0.50 (-2.08, 1.08) | 0.35 (-0.42, 1.11) | Placebo |

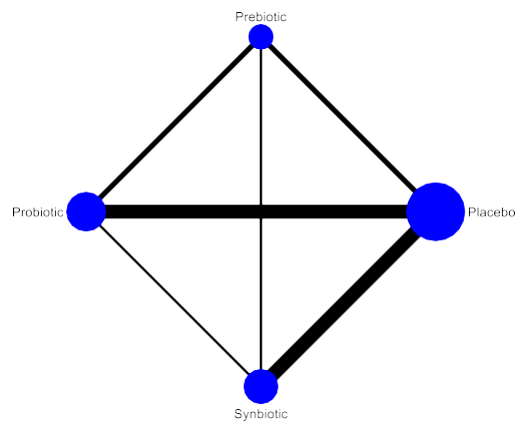

(a)

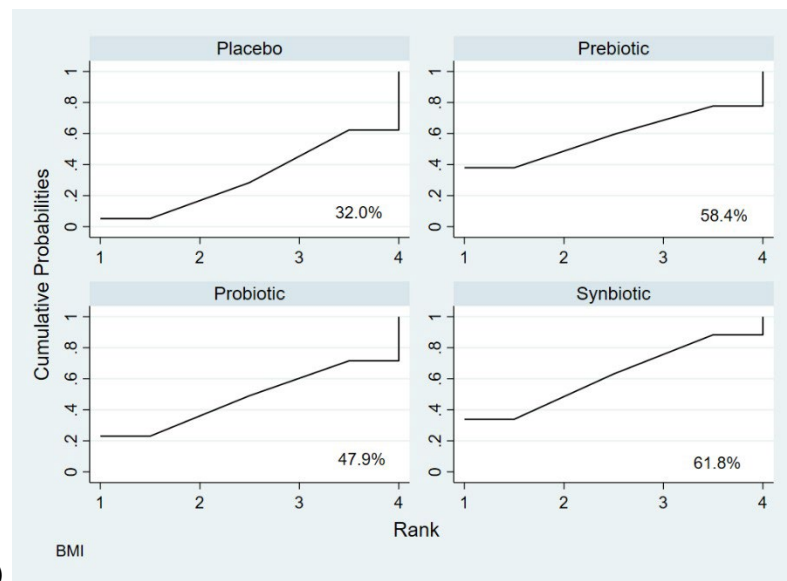

(b)

**Figure S42** Sensitivity analysis of the reduction in BMI duration of treatment not less than 12 weeks among NAFLD patients. (a) network graph and (b) SUCRA curves

**Table S31** Network-estimated, weighted mean difference of options for reduction in BMI duration of treatment not less than 12 weeks among NAFLD patients.

|                     |                     |                     |         |
|---------------------|---------------------|---------------------|---------|
| Synbiotics          |                     |                     |         |
| 0.01 (-1.49, 1.51)  | Prebiotics          |                     |         |
| -0.13 (-1.46, 1.20) | -0.14 (-1.46, 1.18) | Probiotics          |         |
| -0.27 (-0.91, 0.38) | -0.28 (-1.67, 1.11) | -0.14 (-1.34, 1.06) | Placebo |

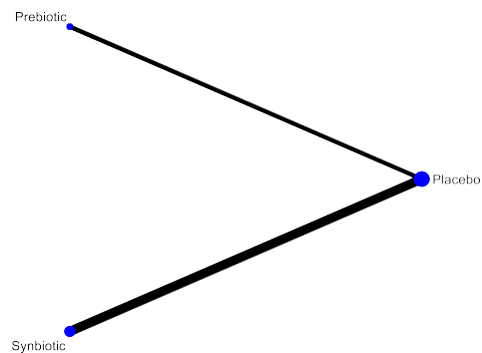

(a)

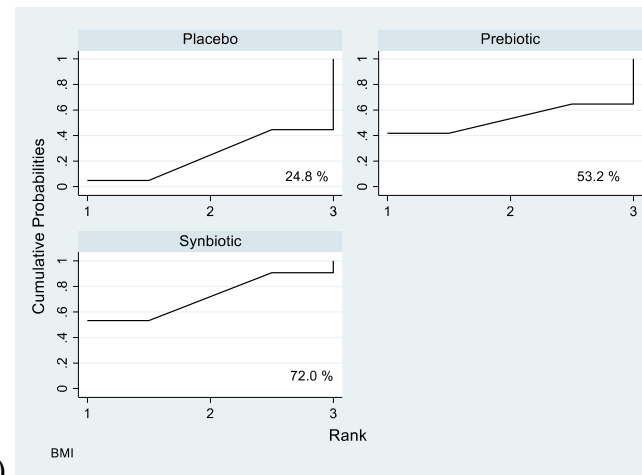

(b)

**Figure S43** Sensitivity analysis of the reduction in BMI duration of treatment less than 12 weeks among NAFLD patients. (a) network graph and (b) SUCRA curves

**Table S32** Network-estimated, weighted mean difference of options for reduction in BMU duration of treatment less than 12 weeks among NAFLD patients.

|                     |                     |         |
|---------------------|---------------------|---------|
| Synbiotics          |                     |         |
| -0.16 (-1.97, 1.65) | Prebiotics          |         |
| -0.46 (-1.24, 0.33) | -0.30 (-1.93, 1.33) | Placebo |

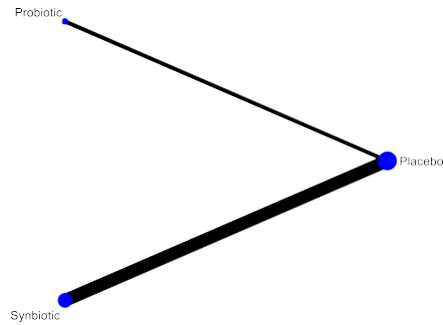

(a)

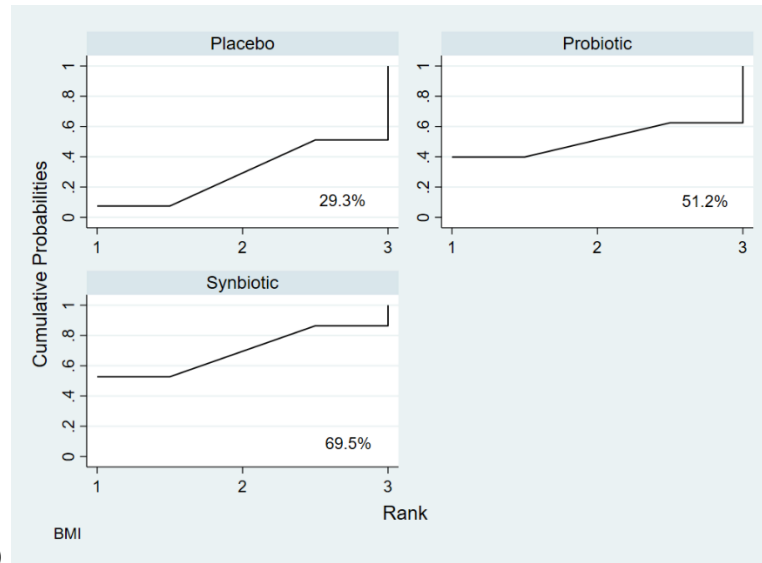

(b)

**Figure S44** Sensitivity analysis of the reduction in BMI duration of treatment not less than 12 weeks among NASH patients. (a) network graph and (b) SUCRA curves

**Table S33** Network-estimated, weighted mean difference of options for reduction in BMI duration of treatment not less than 12 weeks among NASH patients.

|                     |                     |         |
|---------------------|---------------------|---------|
| Synbiotics          |                     |         |
| -0.41 (-4.54, 3.72) | Probiotics          |         |
| -0.91 (-2.94, 1.12) | -0.50 (-4.09, 3.09) | Placebo |



### Appendix 16: Sensitivity analyses of WC outcomes

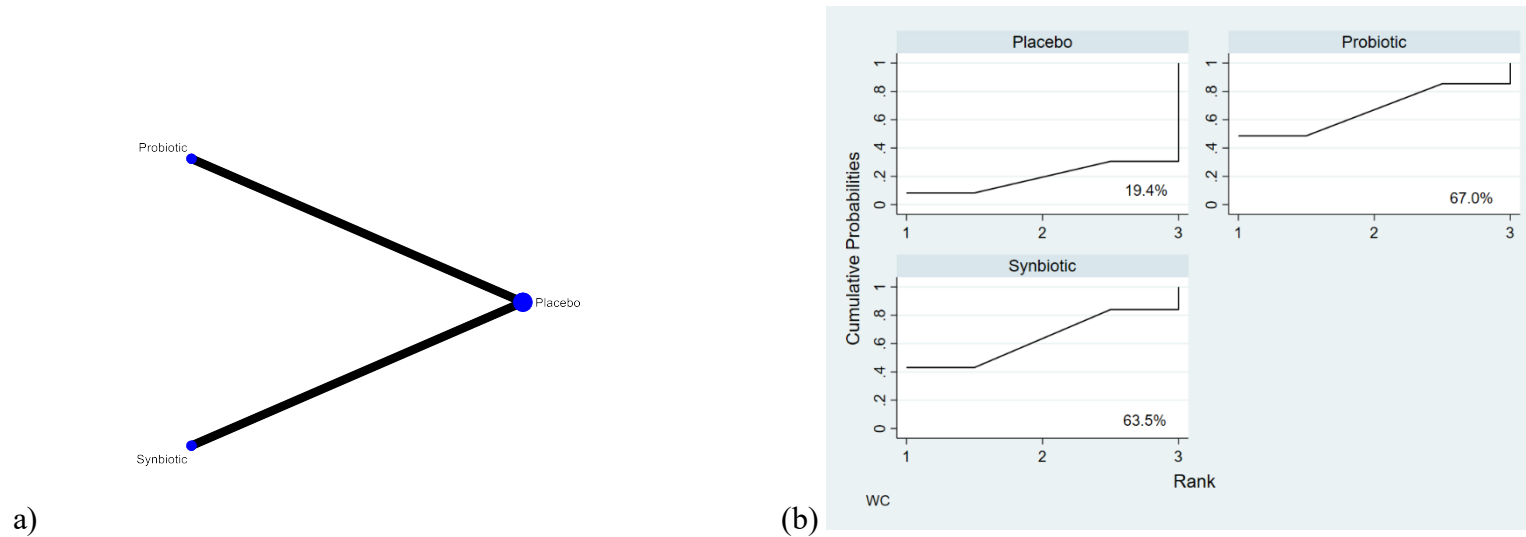

**Figure S45** Sensitivity analysis of the reduction in WC among biopsy-proven NASH patients. (a) network graph and (b) SUCRA curves

**Table S34** Network-estimated, weighted mean difference of options for reduction in WC among biopsy-proven NASH patients.

|                     |                     |         |
|---------------------|---------------------|---------|
| Probiotics          |                     |         |
| -0.20 (-6.90,6.50)  | Synbiotics          |         |
| -3.00 (-9.81, 3.81) | -2.80 (-9.39, 3.79) | Placebo |

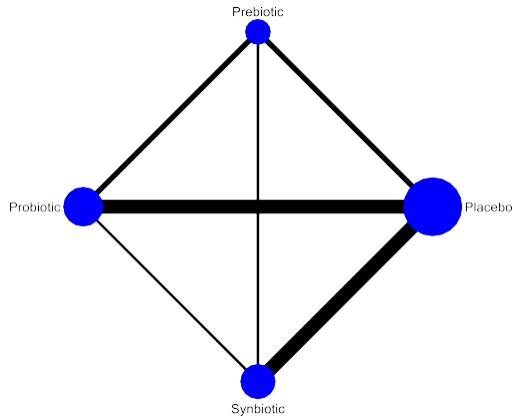

(a)

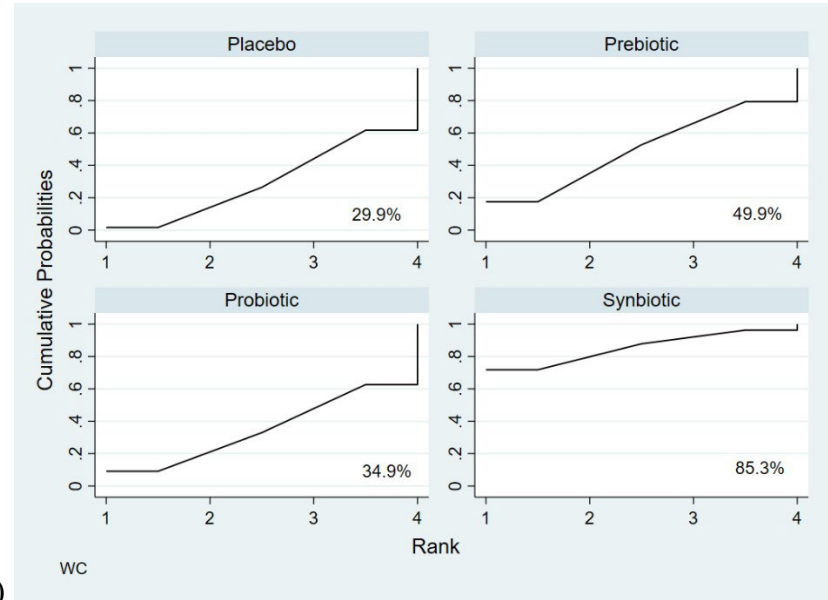

(b)

**Figure S46** Sensitivity analysis of the reduction in WC duration of treatment not less than 12 weeks among NAFLD patients. (a) network graph and (b) SUCRA curves

**Table S35** Network-estimated, weighted mean difference of options for reduction in WC duration of treatment not less than 12 weeks among NAFLD patients.

|                     |                     |                     |         |
|---------------------|---------------------|---------------------|---------|
| Synbiotics          |                     |                     |         |
| -1.61 (-5.66, 2.44) | Prebiotics          |                     |         |
| -2.11 (-6.19, 1.96) | -0.50 (-3.47, 2.47) | Probiotics          |         |
| -2.17 (-4.93, 0.60) | -0.56 (-3.47, 2.36) | -0.05 (-2.94, 2.83) | Placebo |

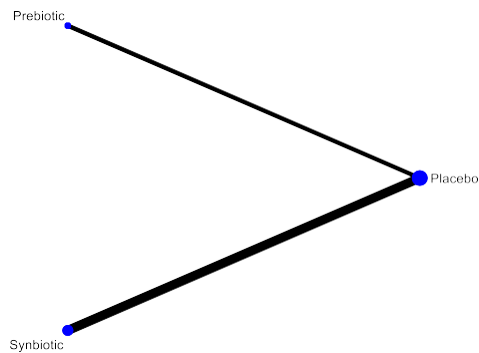

(a)

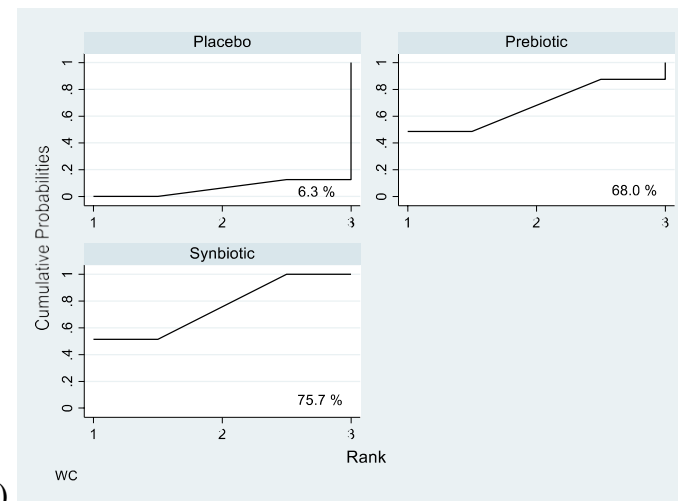

(b)

**Figure S47** Sensitivity analysis of the reduction in WC duration of treatment less than 12 weeks among NAFLD patients. (a) network graph and (b) SUCRA curves

**Table S36** Network-estimated, weighted mean difference of options for reduction in WC duration of treatment less than 12 weeks among NAFLD patients.

|                                    |                     |         |
|------------------------------------|---------------------|---------|
| Synbiotics                         |                     |         |
| -0.04 (-3.86, 3.78)                | Prebiotics          |         |
| <b><u>-2.24 (-3.01, -1.48)</u></b> | -2.20 (-5.95, 1.55) | Placebo |

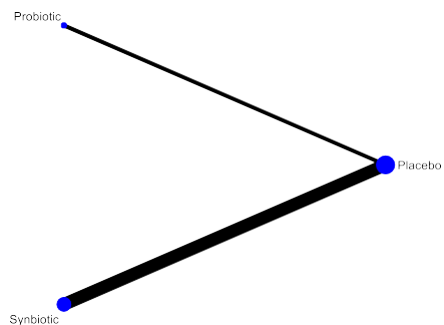

(a)

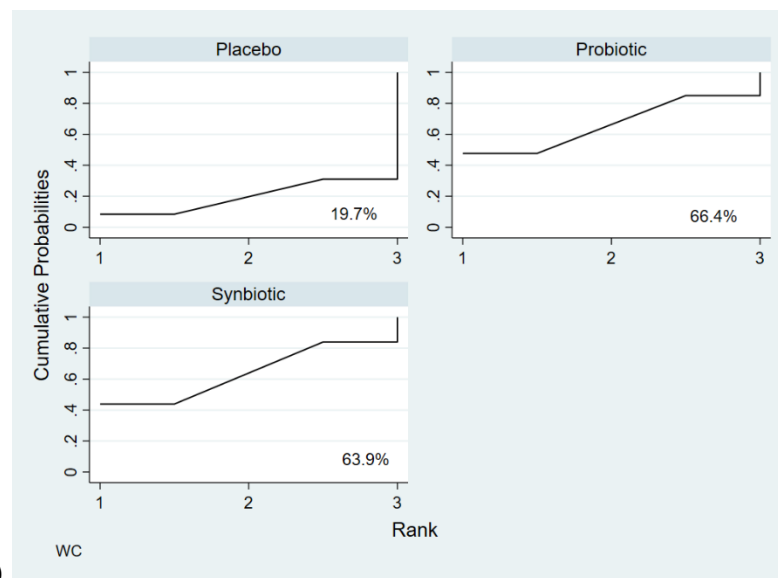

(b)

**Figure S48** Sensitivity analysis of the reduction in WC duration of treatment not less than 12 weeks among NASH patients. (a) network graph and (b) SUCRA curves

**Table S37** Network-estimated, weighted mean difference of options for reduction in WC duration of treatment not less than 12 weeks among NASH patients.

|                     |                     |         |
|---------------------|---------------------|---------|
| Probiotics          |                     |         |
| -0.20 (-6.90, 6.50) | Synbiotics          |         |
| -3.00 (-9.81, 3.81) | -2.80 (-9.39, 3.79) | Placebo |

### Appendix 17: Sensitivity analyses of lipid profile outcomes

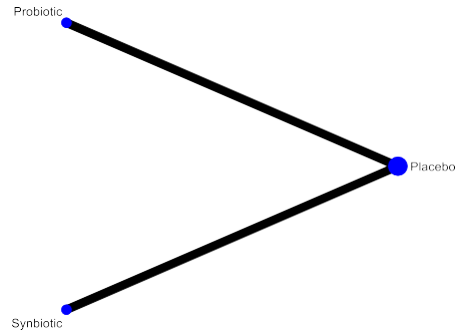

a)

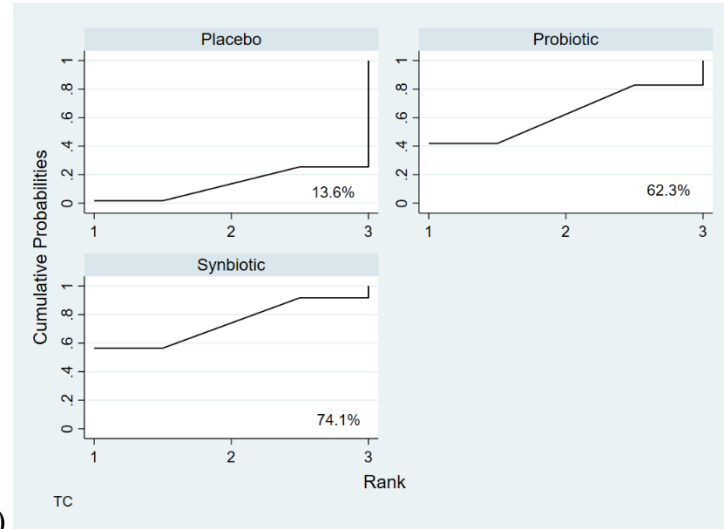

(b)

**Figure S49** Sensitivity analysis of the reduction in TC among biopsy-proven NASH patients. (a) network graph and (b) SUCRA curves

**Table S38** Network-estimated, weighted mean difference of options for reduction in TC among biopsy-proven NASH patients.

|                       |                      |         |
|-----------------------|----------------------|---------|
| Synbiotics            |                      |         |
| -1.98 (-23.55, 19.59) | Probiotics           |         |
| -9.71 (-23.79, 4.37)  | -7.73 (-24.08, 8.62) | Placebo |

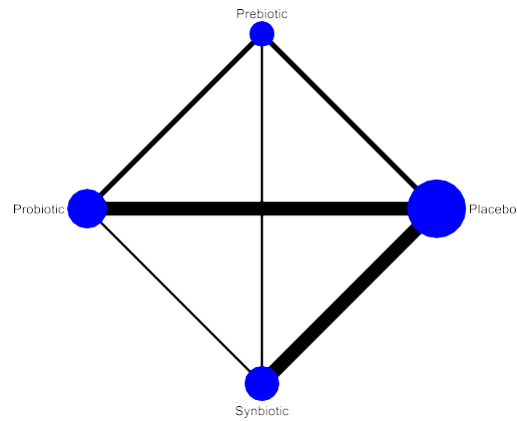

(a)

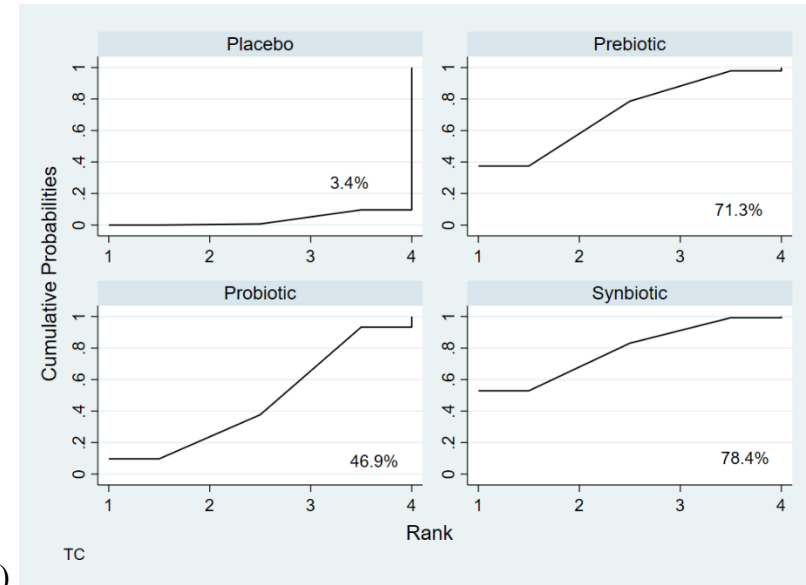

(b)

**Figure S50** Sensitivity analysis of the reduction in TC duration of treatment not less than 12 weeks among NAFLD patients. (a) network graph and (b) SUCRA curves

**Table S39** Network-estimated, weighted mean difference of options for reduction in TC duration of treatment not less than 12 weeks among NAFLD patients.

|                                      |                                      |                       |         |
|--------------------------------------|--------------------------------------|-----------------------|---------|
| Synbiotics                           |                                      |                       |         |
| -2.01 (-22.22, 18.21)                | Prebiotics                           |                       |         |
| -7.52 (-26.64, 11.60)                | -5.51 (-22.58, 11.56)                | Probiotics            |         |
| <b><u>-18.04 (-33.00, -3.09)</u></b> | <b><u>-16.04 (-32.03, -0.05)</u></b> | -10.53 (-24.45, 3.40) | Placebo |

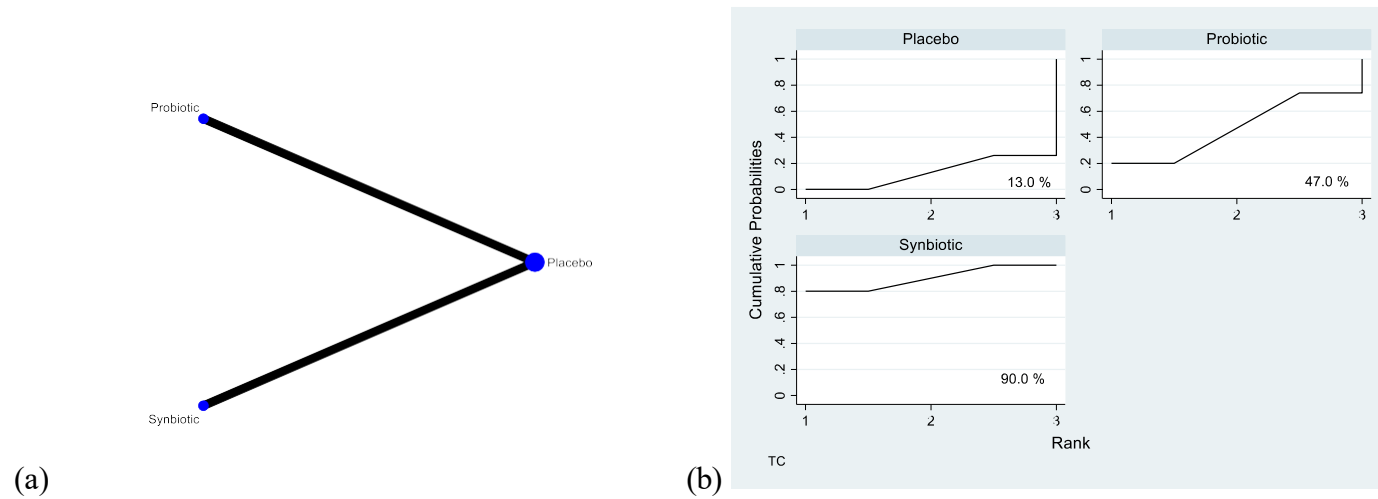

**Figure S51** Sensitivity analysis of the reduction in TC duration of treatment less than 12 weeks among NAFLD patients. (a) network graph and (b) SUCRA curves

**Table S40** Network-estimated, weighted mean difference of options for reduction in TC duration of treatment less than 12 weeks among NAFLD patients.

|                                       |                        |         |
|---------------------------------------|------------------------|---------|
| Synbiotics                            |                        |         |
| -14.86 (-48.91, 19.19)                | Probiotics             |         |
| <b><u>-25.67 (-35.75, -15.59)</u></b> | -10.81 (-43.33, 21.71) | Placebo |

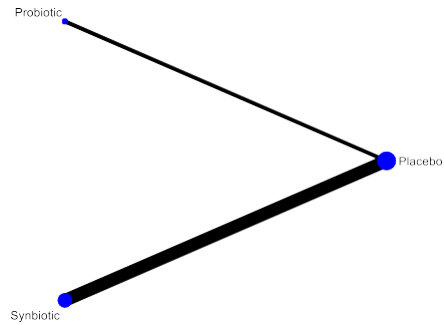

(a)

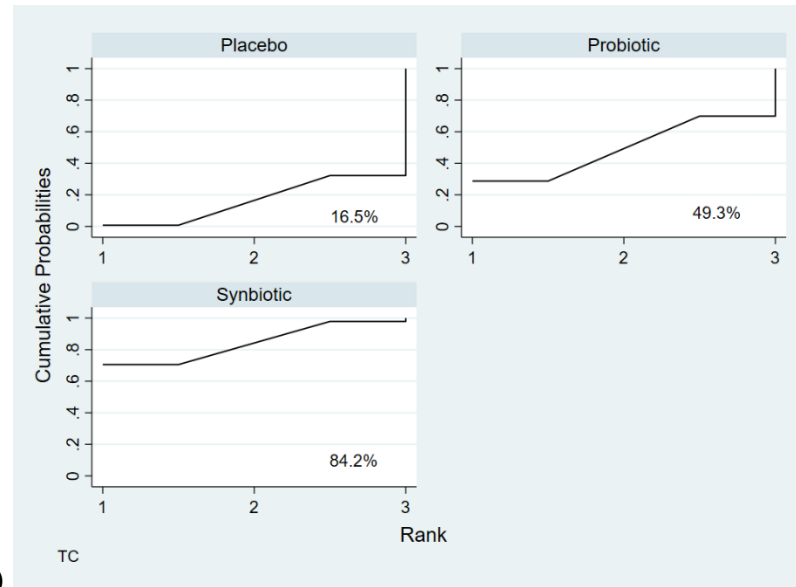

(b)

**Figure S52** Sensitivity analysis of the reduction in TC duration of treatment not less than 12 weeks among NASH patients. (a) network graph and (b) SUCRA curves

**Table S41** Network-estimated, weighted mean difference of options for reduction in TC duration of treatment not less than 12 weeks among NASH patients.

|                                      |                       |         |
|--------------------------------------|-----------------------|---------|
| Synbiotics                           |                       |         |
| -10.35 (-45.65, 24.94)               | Probiotics            |         |
| <b><u>-18.08 (-35.94, -0.23)</u></b> | -7.73 (-38.18, 22.72) | Placebo |



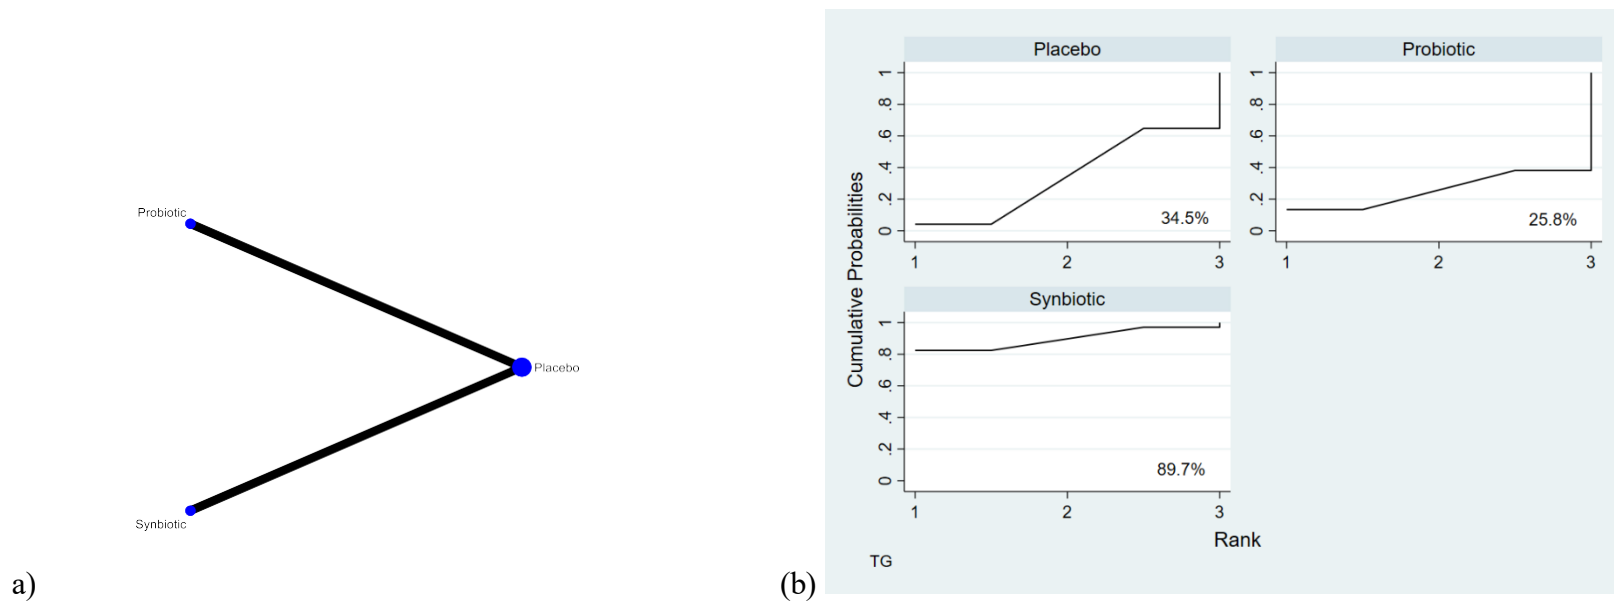

**Figure S53** Sensitivity analysis of the reduction in TG among biopsy-proven NASH patients. (a) network graph and (b) SUCRA curves

**Table S42** Network-estimated, weighted mean difference of options for reduction in TG among biopsy-proven NASH patients.

|                         |                      |         |
|-------------------------|----------------------|---------|
| Synbiotics              |                      |         |
| -36.08 (-101.19, 29.03) | Probiotics           |         |
| -27.23 (-61.66, 7.20)   | 8.85 (-46.41, 64.11) | Placebo |

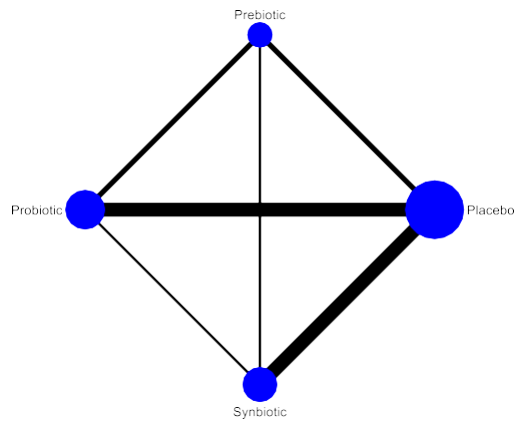

(a)

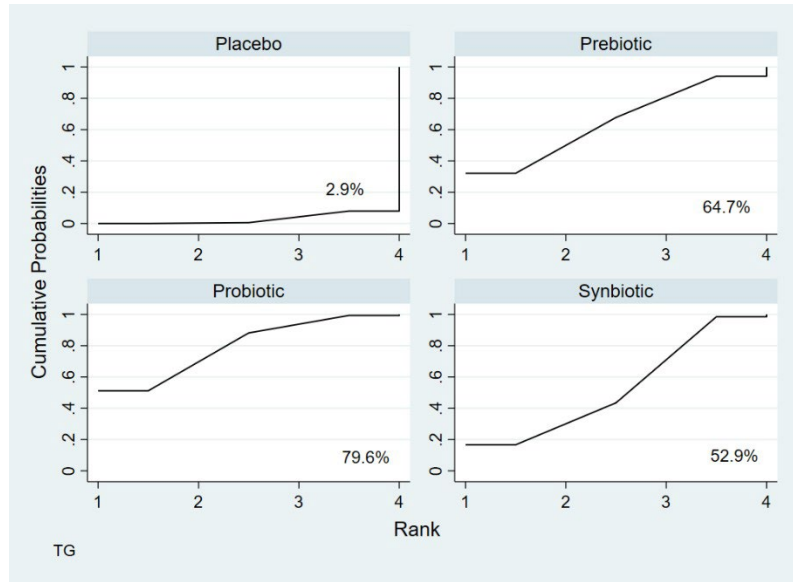

(b)

**Figure S54** Sensitivity analysis of the reduction in TG duration of treatment not less than 12 weeks among NAFLD patients. (a) network graph and (b) SUCRA curves

**Table S43** Network-estimated, weighted mean difference of options for reduction in TG duration of treatment not less than 12 weeks among NAFLD patients.

|                                      |                       |                                      |         |
|--------------------------------------|-----------------------|--------------------------------------|---------|
| Probiotics                           |                       |                                      |         |
| -3.98 (-28.34, 20.38)                | Prebiotics            |                                      |         |
| -9.19 (-33.73, 15.35)                | -5.21 (-34.66, 24.25) | Synbiotics                           |         |
| <b><u>-25.34 (-46.42, -4.27)</u></b> | -21.37 (-48.27, 5.54) | <b><u>-16.16 (-31.42, -0.90)</u></b> | Placebo |

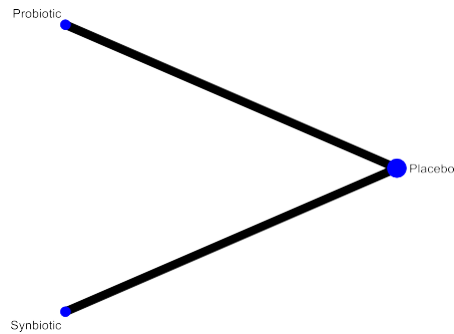

(a)

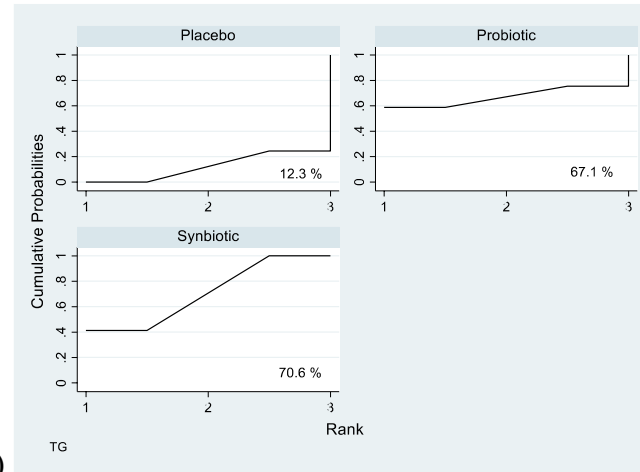

(b)

**Figure S55** Sensitivity analysis of the reduction in TG duration of treatment less than 12 weeks among NAFLD patients. (a) network graph and (b) SUCRA curves

**Table S44** Network-estimated, weighted mean difference of options for reduction in TG duration of treatment less than 12 weeks among NAFLD patients.

|                               |                        |         |
|-------------------------------|------------------------|---------|
| Synbiotics                    |                        |         |
| 7.69 (-59.10, 74.47)          | Probiotics             |         |
| <b>-15.33 (-22.39, -8.28)</b> | -23.02 (-89.43, 43.39) | Placebo |

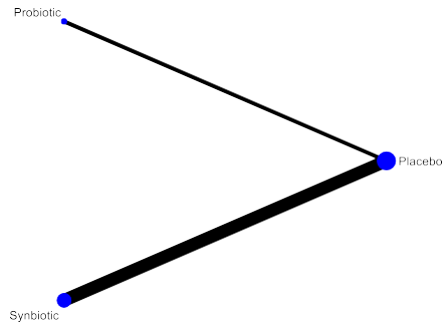

(a)

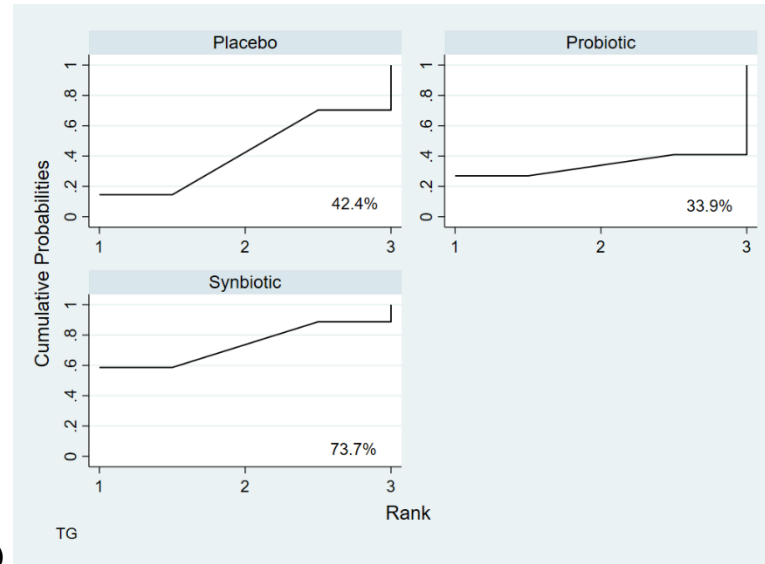

(b)

**Figure S56** Sensitivity analysis of the reduction in TG duration of treatment not less than 12 weeks among NASH patients. (a) network graph and (b) SUCRA curves

**Table S45** Network-estimated, weighted mean difference of options for reduction in TG duration of treatment not less than 12 weeks among NASH patients.

|                        |                      |         |
|------------------------|----------------------|---------|
| Synbiotics             |                      |         |
| -18.28 (-83.23, 46.67) | Probiotics           |         |
| -9.43 (-34.97, 16.11)  | 8.85 (-50.87, 68.57) | Placebo |

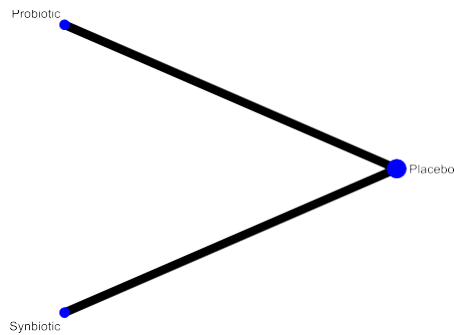

a)

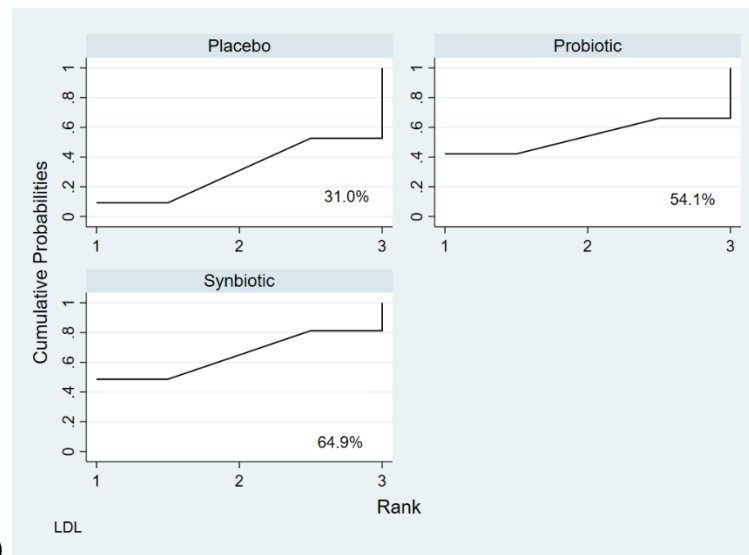

(b)

**Figure S57** Sensitivity analysis of the reduction in LDL among biopsy-proven NASH patients. (a) network graph and (b) SUCRA curves

**Table S46** Network-estimated, weighted mean difference of options for reduction in LDL among biopsy-proven NASH patients.

|                        |                       |         |
|------------------------|-----------------------|---------|
| Synbiotics             |                       |         |
| -2.71 (-56.92, 51.51)  | Probiotics            |         |
| -10.46 (-41.14, 20.23) | -7.75 (-52.44, 36.94) | Placebo |

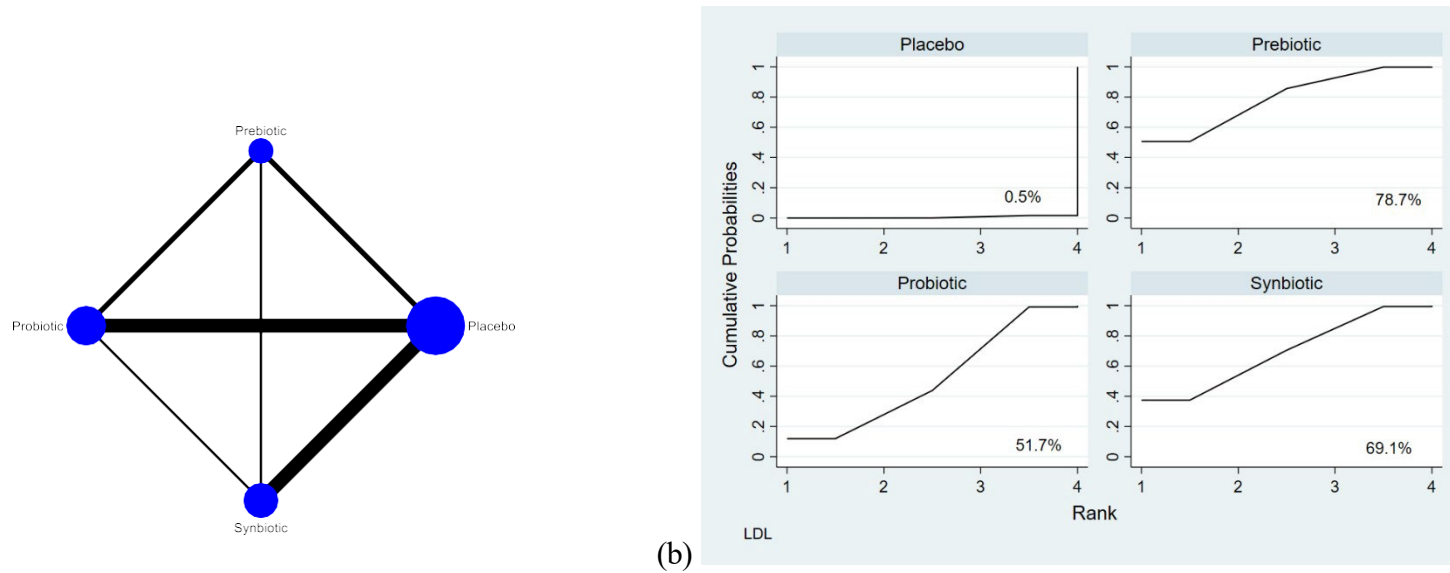

**Figure S58** Sensitivity analysis of the reduction in LDL duration of treatment not less than 12 weeks among NAFLD patients. (a) network graph and (b) SUCRA curves

**Table S47** Network-estimated, weighted mean difference of options for reduction in LDL duration of treatment not less than 12 weeks among NAFLD patients.

|                                      |                                      |                                      |         |
|--------------------------------------|--------------------------------------|--------------------------------------|---------|
| Prebiotics                           |                                      |                                      |         |
| -1.55 (-15.77, 12.68)                | Synbiotics                           |                                      |         |
| -4.51 (-16.33, 7.30)                 | -2.97 (-17.05, 11.12)                | Probiotics                           |         |
| <b><u>-16.40 (-27.16, -5.63)</u></b> | <b><u>-14.85 (-26.31, -3.38)</u></b> | <b><u>-11.88 (-21.69, -2.08)</u></b> | Placebo |

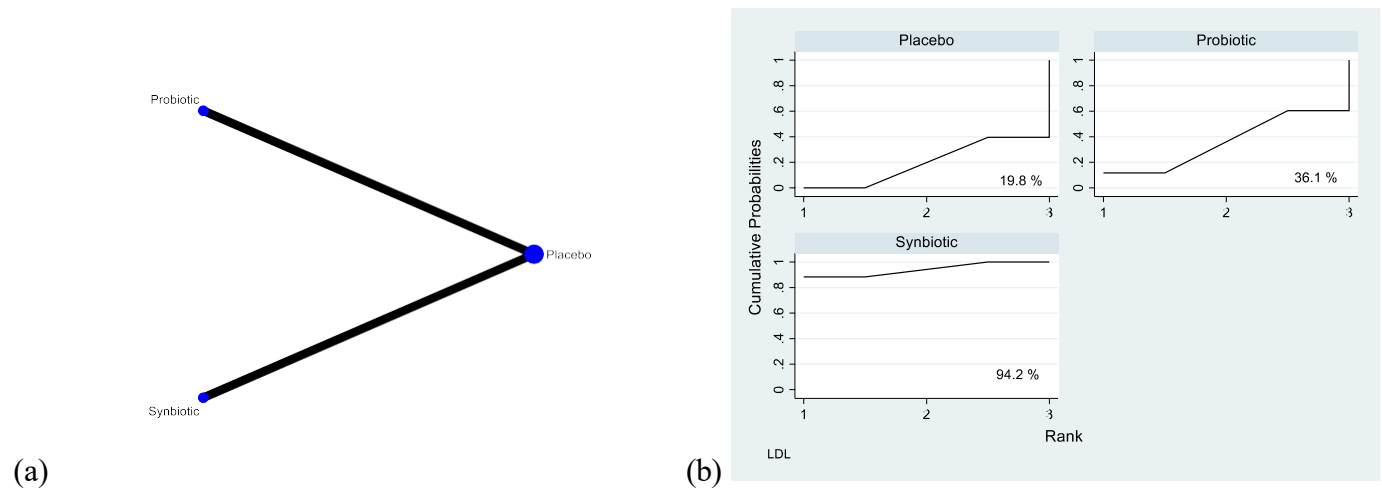

**Figure S59** Sensitivity analysis of the reduction in LDL duration of treatment less than 12 weeks among NAFLD patients. (a) network graph and (b) SUCRA curves

**Table S48** Network-estimated, weighted mean difference of options for reduction in LDL duration of treatment less than 12 weeks among NAFLD patients.

|                                       |                       |         |
|---------------------------------------|-----------------------|---------|
| Synbiotics                            |                       |         |
| -18.38 (-48.09, 11.33)                | Probiotics            |         |
| <b><u>-22.24 (-31.56, -12.91)</u></b> | -3.86 (-32.07, 24.35) | Placebo |

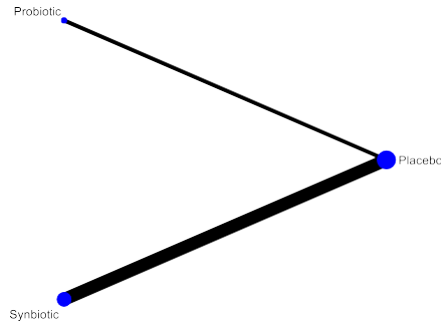

(a)

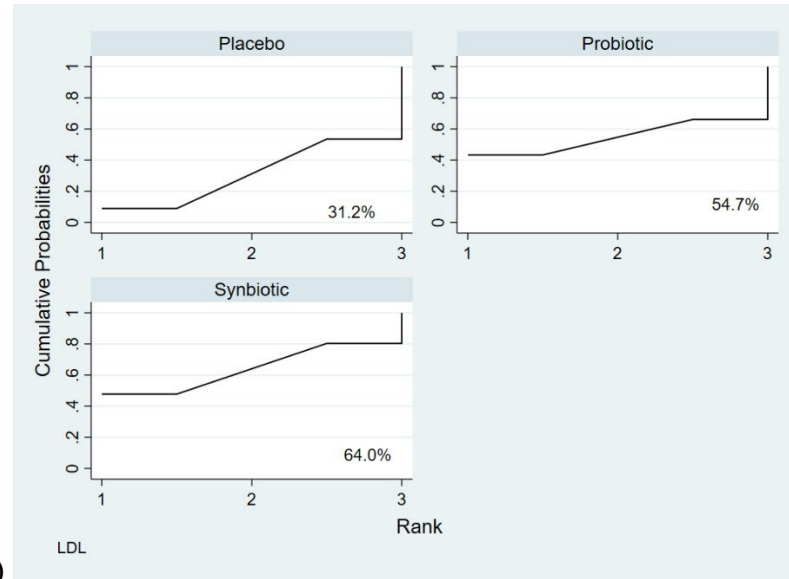

(b)

**Figure S60** Sensitivity analysis of the reduction in LDL duration of treatment not less than 12 weeks among NASH patients. (a) network graph and (b) SUCRA curves

**Table S49** Network-estimated, weighted mean difference of options for reduction in LDL duration of treatment not less than 12 weeks among NASH patients.

|                        |                       |         |
|------------------------|-----------------------|---------|
| Synbiotics             |                       |         |
| -2.71 (-56.92, 51.51)  | Probiotics            |         |
| -10.46 (-41.14, 20.23) | -7.75 (-52.44, 36.94) | Placebo |



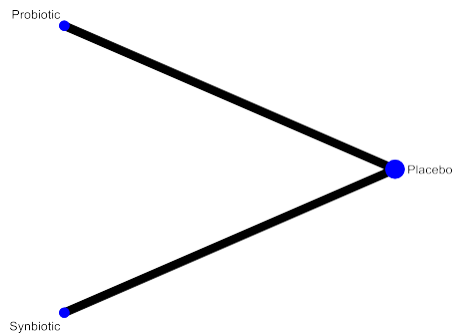

a)

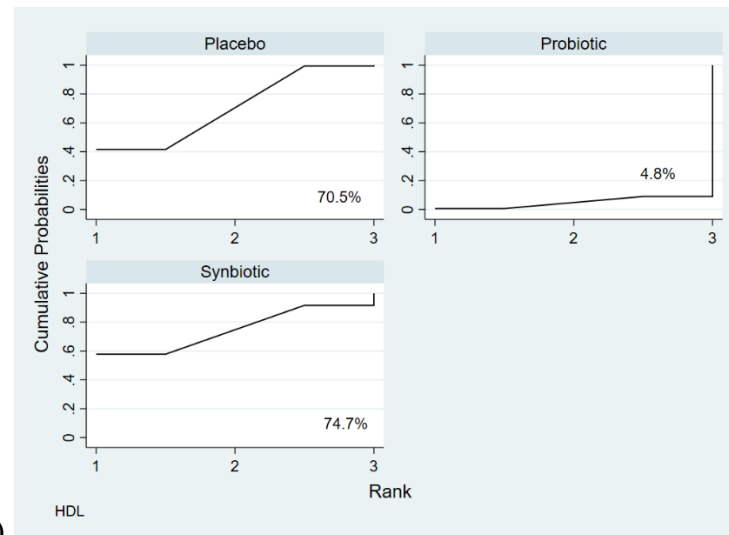

(b)

**Figure S61** Sensitivity analysis of the increasing in HDL among biopsy-proven NASH patients. (a) network graph and (b) SUCRA curves

**Table S50** Network-estimated, weighted mean difference of options for increasing in HDL among biopsy-proven NASH patients.

|                     |                             |         |
|---------------------|-----------------------------|---------|
| Synbiotics          |                             |         |
| 4.42 (-1.94, 10.78) | Probiotics                  |         |
| 0.56 (-4.81, 5.94)  | <u>-3.86 (-7.25, -0.47)</u> | Placebo |

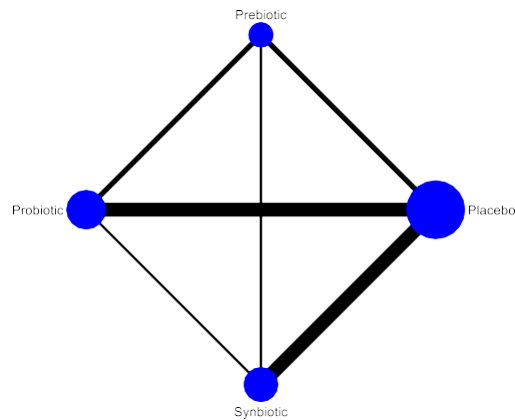

(a)

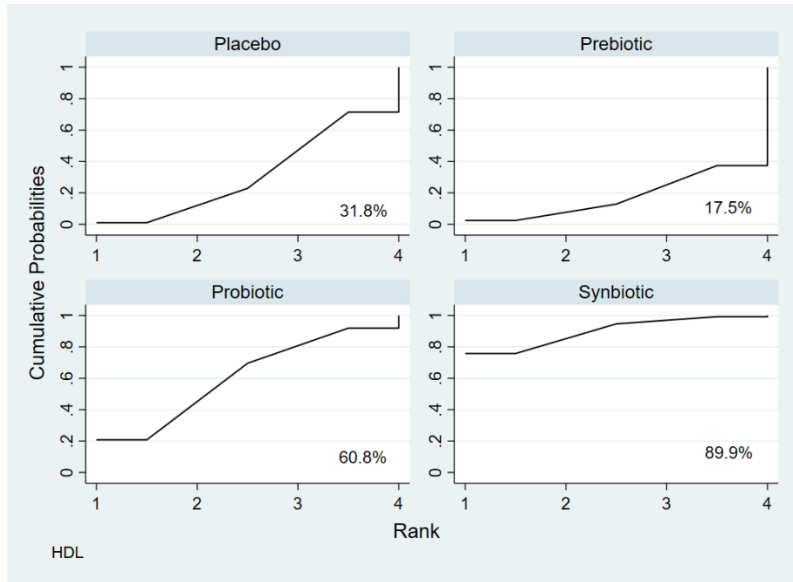

(b)

**Figure S62** Sensitivity analysis of the increasing in HDL duration of treatment not less than 12 weeks among NAFLD patients. (a) network graph and (b) SUCRA curves

**Table S51** Network-estimated, weighted mean difference of options for increasing in HDL duration of treatment not less than 12 weeks among NAFLD patients.

|                    |                    |                     |         |
|--------------------|--------------------|---------------------|---------|
| Synbiotics         |                    |                     |         |
| 1.45 (-2.24, 5.14) | Probiotics         |                     |         |
| 3.22 (-0.72, 7.15) | 1.77 (-1.51, 5.04) | Prebiotics          |         |
| 2.48 (-0.05, 5.01) | 1.03 (-2.00, 4.05) | -0.74 (-4.05, 2.57) | Placebo |

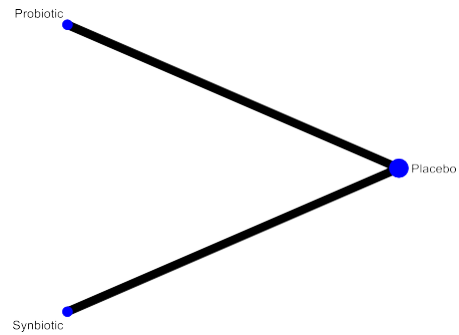

(a)

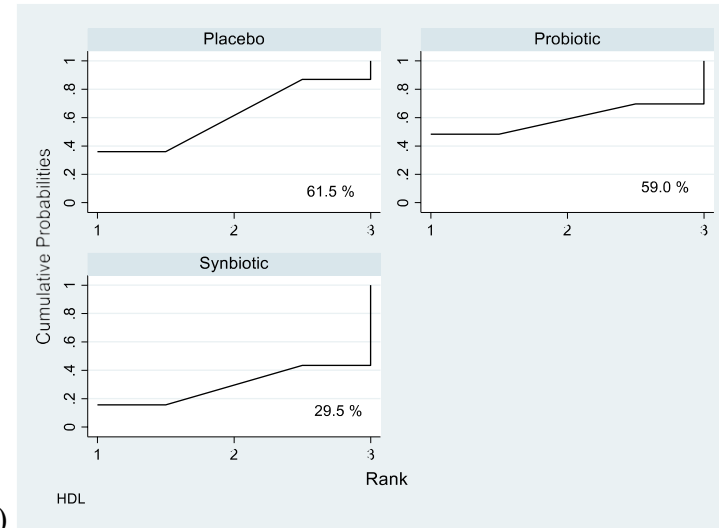

(b)

**Figure S63** Sensitivity analysis of the increasing in HDL duration of treatment less than 12 weeks among NAFLD patients. (a) network graph and (b) SUCRA curves

**Table S52** Network-estimated, weighted mean difference of options for increasing in HDL duration of treatment less than 12 weeks among NAFLD patients.

|                       |                      |         |
|-----------------------|----------------------|---------|
| Synbiotics            |                      |         |
| -3.81 (-22.19, 14.56) | Probiotics           |         |
| -3.43 (-13.26, 6.40)  | 0.38 (-15.14, 15.90) | Placebo |

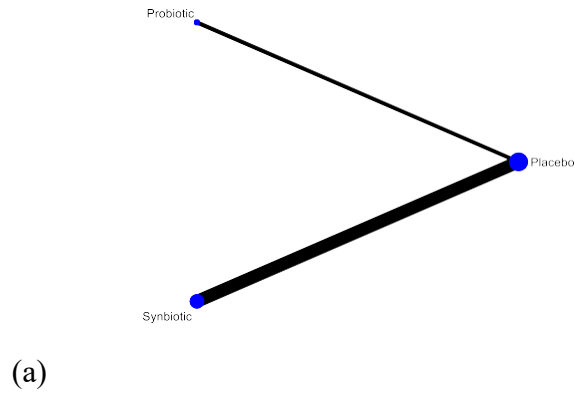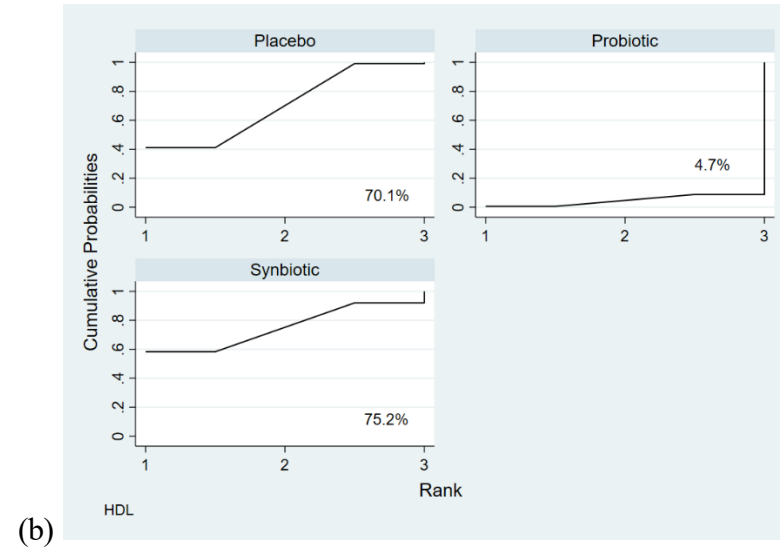

**Figure S64** Sensitivity analysis of the increasing in HDL duration of treatment not less than 12 weeks among NASH patients. (a) network graph and (b) SUCRA curves

**Table S53** Network-estimated, weighted mean difference of options for increasing in HDL duration of treatment not less than 12 weeks among NASH patients.

|                     |                                    |         |
|---------------------|------------------------------------|---------|
| Synbiotics          |                                    |         |
| 4.42 (-1.94, 10.78) | Probiotics                         |         |
| 0.56 (-4.81, 5.94)  | <b><u>-3.86 (-7.25, -0.47)</u></b> | Placebo |

### Appendix 18: Sensitivity analyses of FBS outcome

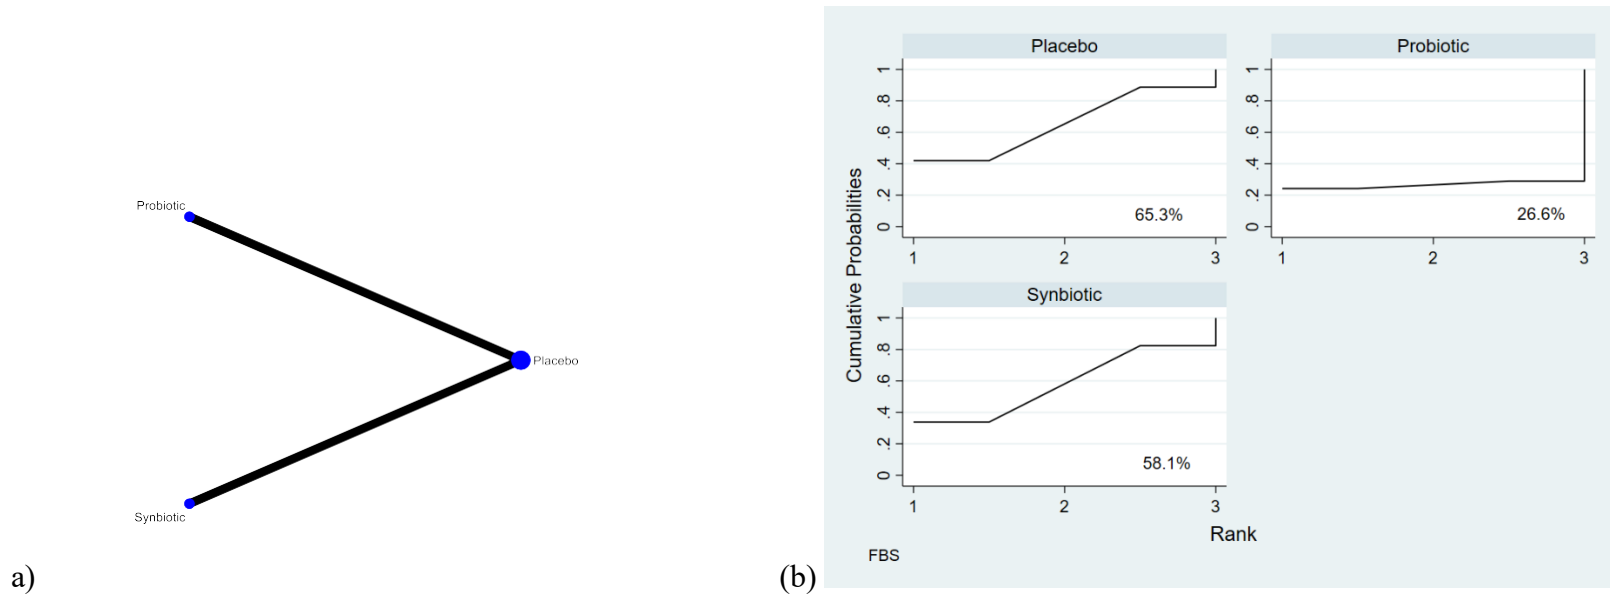

**Figure S65** Sensitivity analysis of the reduction in FBS among biopsy-proven NASH patients. (a) network graph and (b) SUCRA curves

**Table S54** Network-estimated, weighted mean difference of options for reduction in FBS among biopsy-proven NASH patients.

|                        |                        |            |
|------------------------|------------------------|------------|
| Placebo                |                        |            |
| -0.46 (-6.20, 5.28)    | Synbiotics             |            |
| -10.80 (-44.08, 22.48) | -10.34 (-44.12, 23.43) | Probiotics |

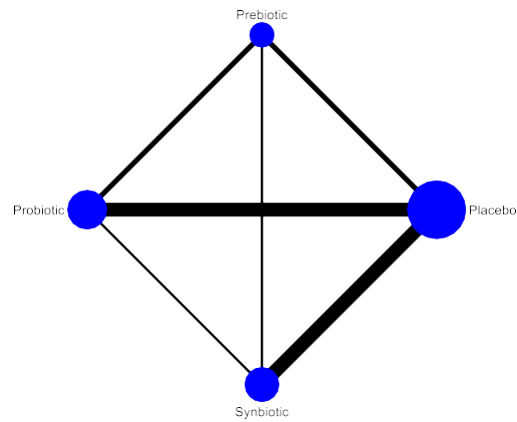

(a)

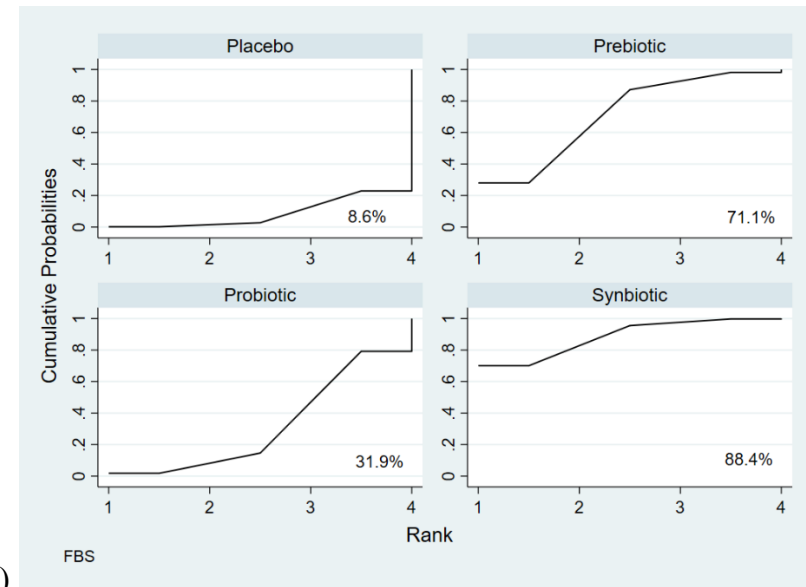

(b)

**Figure S66** Sensitivity analysis of the reduction in FBS duration of treatment not less than 12 weeks among NAFLD patients. (a) network graph and (b) SUCRA curves

**Table S55** Network-estimated, weighted mean difference of options for reduction in FBS duration of treatment not less than 12 weeks among NAFLD patients.

|                                    |                     |                     |         |
|------------------------------------|---------------------|---------------------|---------|
| Synbiotics                         |                     |                     |         |
| -1.34 (-6.00, 3.32)                | Prebiotics          |                     |         |
| -3.68 (-8.09, 0.74)                | -2.34 (-6.24, 1.57) | Probiotics          |         |
| <b><u>-5.15 (-9.18, -1.12)</u></b> | -3.81 (-8.00, 0.38) | -1.47 (-5.18, 2.23) | Placebo |

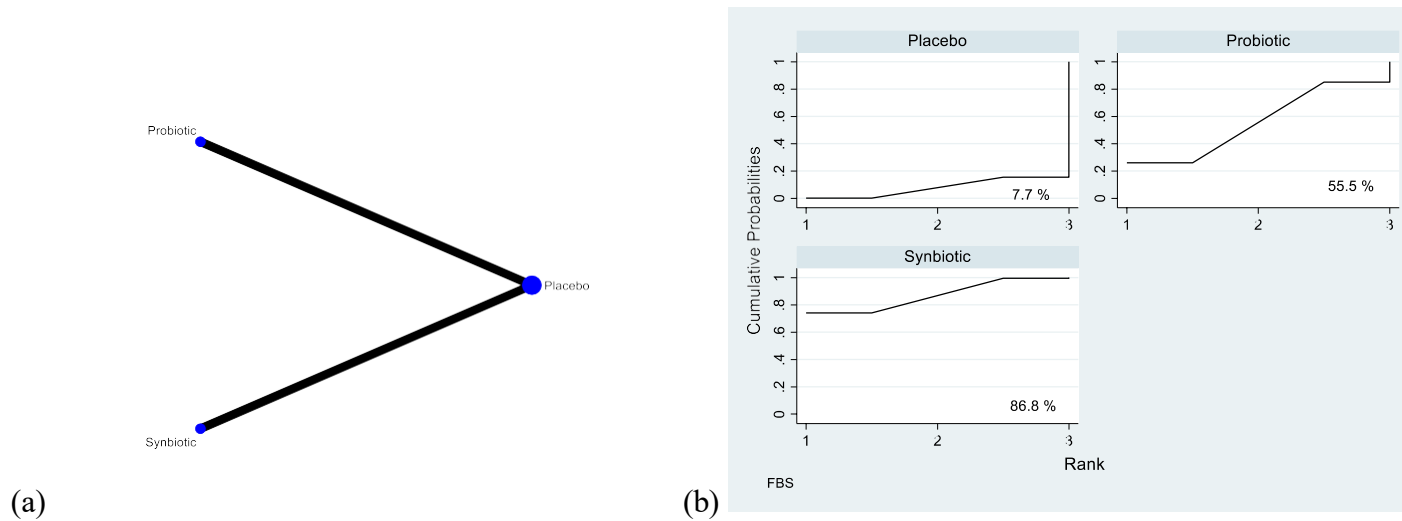

**Figure S67** Sensitivity analysis of the reduction in FBS duration of treatment less than 12 weeks among NAFLD patients. (a) network graph and (b) SUCRA curves

**Table S56** Network-estimated, weighted mean difference of options for reduction in FBS duration of treatment less than 12 weeks among NAFLD patients.

|                                      |                      |         |
|--------------------------------------|----------------------|---------|
| Synbiotics                           |                      |         |
| -5.45 (-21.88, 10.99)                | Probiotics           |         |
| <b><u>-12.60 (-22.28, -2.92)</u></b> | -7.15 (-20.44, 6.14) | Placebo |

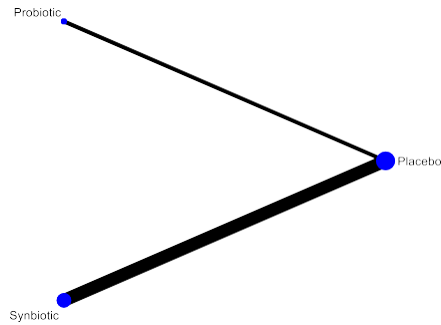

(a)

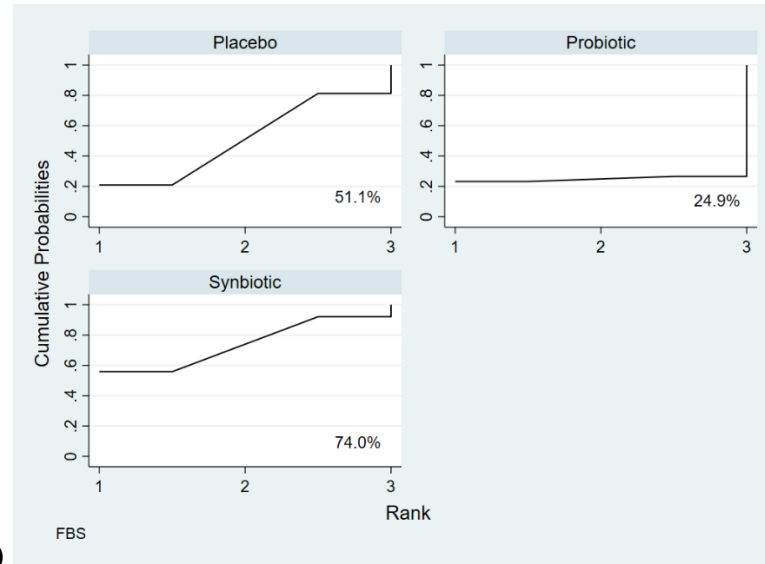

(b)

**Figure S68** Sensitivity analysis of the reduction in FBS duration of treatment not less than 12 weeks among NASH patients. (a) network graph and (b) SUCRA curves

**Table S57** Network-estimated, weighted mean difference of options for reduction in FBS duration of treatment not less than 12 weeks among NASH patients.

|                        |                       |         |
|------------------------|-----------------------|---------|
| Synbiotics             |                       |         |
| -11.92 (-45.42, 21.57) | Probiotics            |         |
| -1.12 (-4.87, 2.63)    | 10.80 (-22.48, 44.08) | Placebo |



### Appendix 19: Sensitivity analyses of HOMA-IR outcomes

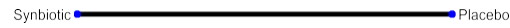

a)

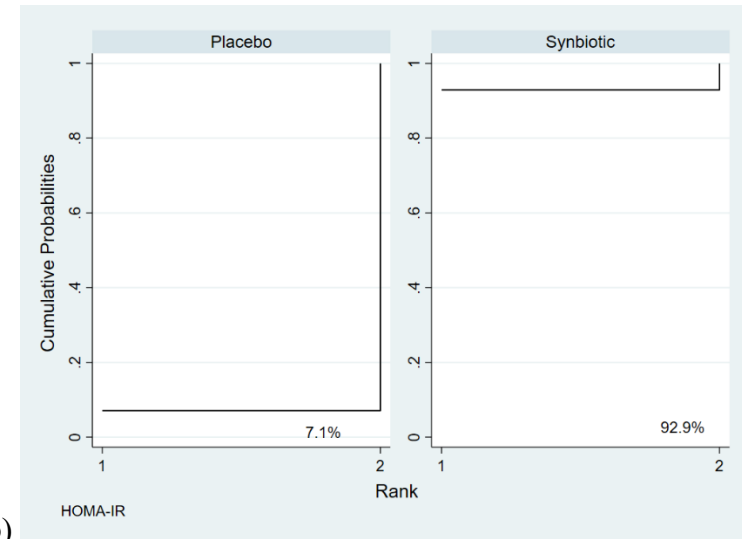

(b)

**Figure S69** Sensitivity analysis of the reduction in HOMA-IR among biopsy-proven NASH patients. (a) network graph and (b) SUCRA curves

**Table S58** Network-estimated, weighted mean difference of options for reduction in HOMA-IR among biopsy-proven NASH patients.

|                     |         |
|---------------------|---------|
| Synbiotics          |         |
| -1.70 (-3.99, 0.59) | Placebo |

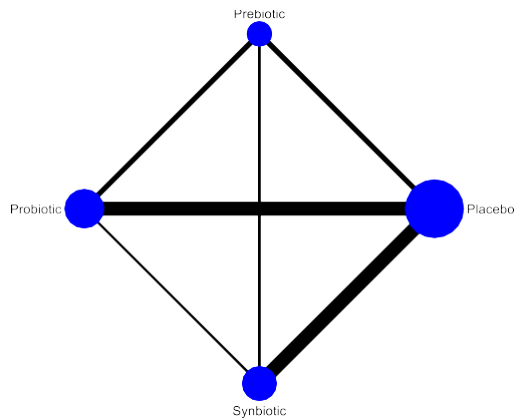

(a)

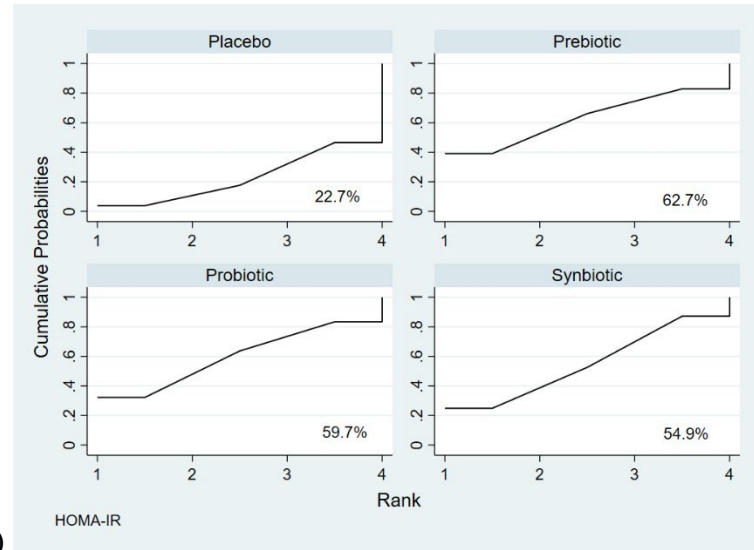

(b)

**Figure S70** Sensitivity analysis of the reduction in HOMA-IR duration of treatment not less than 12 weeks among NAFLD patients. (a) network graph and (b) SUCRA curves

**Table S59** Network-estimated, weighted mean difference of options for reduction in HOMA-IR duration of treatment not less than 12 weeks among NAFLD patients.

|                     |                     |                     |         |
|---------------------|---------------------|---------------------|---------|
| Prebiotics          |                     |                     |         |
| -0.05 (-1.21, 1.11) | Probiotics          |                     |         |
| -0.14 (-1.37, 1.08) | -0.10 (-1.27, 1.08) | Synbiotics          |         |
| -0.44 (-1.62, 0.74) | -0.39 (-1.51, 0.73) | -0.30 (-1.01, 0.41) | Placebo |

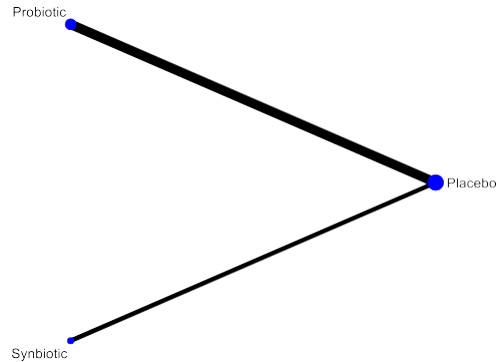

(a)

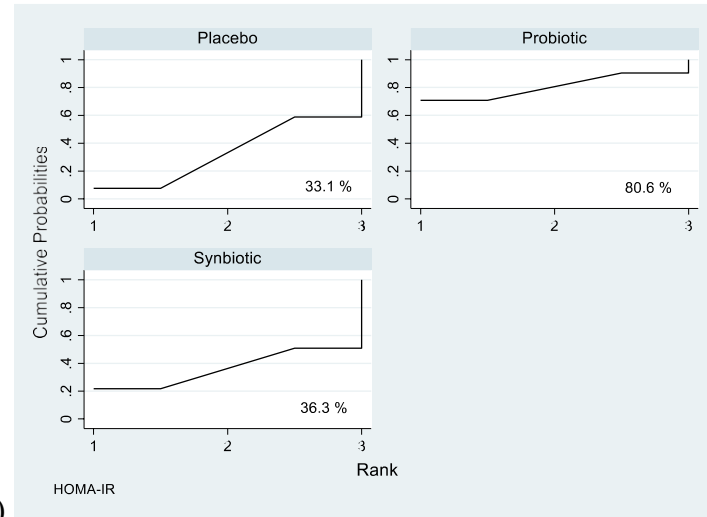

(b)

**Figure S71** Sensitivity analysis of the reduction in HOMA-IR duration of treatment less than 12 weeks among NAFLD patients. (a) network graph and (b) SUCRA curves

**Table S60** Network-estimated, weighted mean difference of options for reduction in HOMA-IR duration of treatment less than 12 weeks among NAFLD patients.

|                     |                    |         |
|---------------------|--------------------|---------|
| Probiotics          |                    |         |
| -0.60 (-2.29, 1.08) | Synbiotics         |         |
| -0.58 (-1.68, 0.51) | 0.02 (-1.26, 1.30) | Placebo |

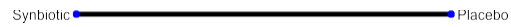

(a)

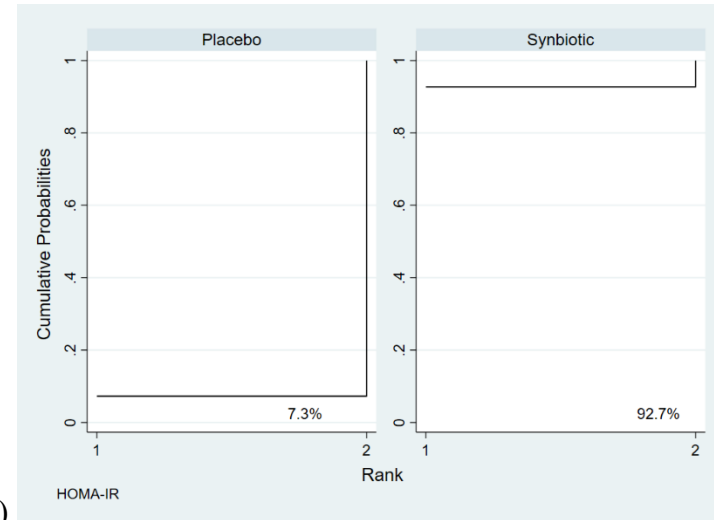

(b)

**Figure S72** Sensitivity analysis of the reduction in HOMA-IR duration of treatment not less than 12 weeks among NASH patients. (a) network graph and (b) SUCRA curves

**Table S61** Network-estimated, weighted mean difference of options for reduction in HOMA-IR duration of treatment not less than 12 weeks among NASH patients.

|                     |         |
|---------------------|---------|
| Synbiotics          |         |
| -1.70 (-3.99, 0.59) | Placebo |
